# Supplementary material for: Systems Biology-Based Investigation of Cellular Antiviral Drug Targets Identified by Gene-Trap Insertional Mutagenesis
Source: PubMed Central journal article supplement (PMC5025164; doi:10.1371/journal.pcbi.1005074), 2016-09-15

**S1 Fig.** Venn diagram showing the relationship between 712 host genes (trapped genes) identified by gene-trap insertional mutagenesis and (A) innate immunity genes and (B) human essential genes.

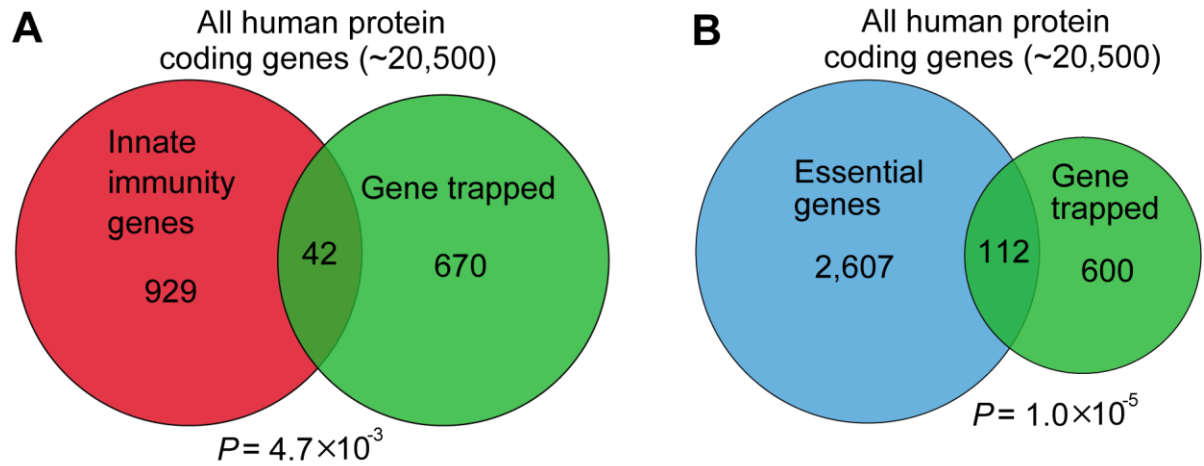

Supplement: pcbi.1005074.s001.pdf [file pcbi.1005074.s001.pdf]
