# Supplementary material for: Systems Biology-Based Investigation of Cellular Antiviral Drug Targets Identified by Gene-Trap Insertional Mutagenesis
Source: PubMed Central journal article supplement (PMC5025164; doi:10.1371/journal.pcbi.1005074), 2016-09-15
Supplement: pcbi.1005074.s003.pdf [file pcbi.1005074.s003.pdf]

**S2 Table.** Top 20 significantly enriched Reactome pathways for 712 host genes identified by gene-trap insertional mutagenesis.

| Pathway Source      | GO Term                                                           | Term <i>P</i> value    | Adjust <i>P</i> value<br>(Bonferroni correction) |
|---------------------|-------------------------------------------------------------------|------------------------|--------------------------------------------------|
| REACTOME_21.03.2014 | Translation                                                       | $2.10 \times 10^{-10}$ | $4.80 \times 10^{-8}$                            |
| REACTOME_21.03.2014 | GTP hydrolysis and joining of the 60S ribosomal subunit           | $2.09 \times 10^{-10}$ | $4.82 \times 10^{-8}$                            |
| REACTOME_21.03.2014 | Gene Expression                                                   | $4.32 \times 10^{-10}$ | $9.86 \times 10^{-8}$                            |
| REACTOME_21.03.2014 | Cap-dependent Translation Initiation                              | $5.71 \times 10^{-10}$ | $1.30 \times 10^{-7}$                            |
| REACTOME_21.03.2014 | Eukaryotic Translation Initiation                                 | $5.71 \times 10^{-10}$ | $1.30 \times 10^{-7}$                            |
| REACTOME_21.03.2014 | L13a-mediated translational silencing of Ceruloplasmin expression | $9.46 \times 10^{-10}$ | $2.13 \times 10^{-7}$                            |
| REACTOME_21.03.2014 | Formation of a pool of free 40S subunits                          | $9.43 \times 10^{-10}$ | $2.13 \times 10^{-7}$                            |
| REACTOME_21.03.2014 | Peptide chain elongation                                          | $1.04 \times 10^{-9}$  | $2.34 \times 10^{-7}$                            |
| REACTOME_21.03.2014 | SRP-dependent cotranslational protein targeting to membrane       | $1.36 \times 10^{-9}$  | $3.04 \times 10^{-7}$                            |
| REACTOME_21.03.2014 | mRNA Splicing - Major Pathway                                     | $1.63 \times 10^{-9}$  | $3.61 \times 10^{-7}$                            |
| REACTOME_21.03.2014 | mRNA Splicing                                                     | $1.63 \times 10^{-9}$  | $3.61 \times 10^{-7}$                            |
| REACTOME_21.03.2014 | Eukaryotic Translation Elongation                                 | $3.30 \times 10^{-9}$  | $7.29 \times 10^{-7}$                            |
| REACTOME_21.03.2014 | Eukaryotic Translation Termination                                | $4.79 \times 10^{-9}$  | $1.05 \times 10^{-6}$                            |
| REACTOME_21.03.2014 | Viral mRNA Translation                                            | $4.79 \times 10^{-9}$  | $1.05 \times 10^{-6}$                            |

---

|                     |                                                                        |                       |                       |
|---------------------|------------------------------------------------------------------------|-----------------------|-----------------------|
| REACTOME_21.03.2014 | Nonsense Mediated Decay<br>Independent of the Exon Junction<br>Complex | $1.00 \times 10^{-8}$ | $2.19 \times 10^{-6}$ |
| REACTOME_21.03.2014 | Influenza Viral RNA<br>Transcription and Replication                   | $3.18 \times 10^{-8}$ | $6.92 \times 10^{-6}$ |
| REACTOME_21.03.2014 | Influenza Infection                                                    | $3.60 \times 10^{-8}$ | $7.81 \times 10^{-6}$ |
| REACTOME_21.03.2014 | Influenza Life Cycle                                                   | $8.11 \times 10^{-8}$ | $1.75 \times 10^{-5}$ |
| REACTOME_21.03.2014 | Nonsense Mediated Decay<br>Enhanced by the Exon Junction<br>Complex    | $8.36 \times 10^{-8}$ | $1.80 \times 10^{-5}$ |
| REACTOME_21.03.2014 | Nonsense-Mediated Decay                                                | $8.36 \times 10^{-8}$ | $1.80 \times 10^{-5}$ |

---
