# Supplementary material for: Systems Biology-Based Investigation of Cellular Antiviral Drug Targets Identified by Gene-Trap Insertional Mutagenesis
Source: PubMed Central journal article supplement (PMC5025164; doi:10.1371/journal.pcbi.1005074), 2016-09-15
Supplement: pcbi.1005074.s004.pdf [file pcbi.1005074.s004.pdf]

**S3 Table.** Top 20 significantly enriched Reactome pathways for 2,443 host genes identified in previously published RNAi screening studies.

| Pathway Source      | GO Term                                                          | Term <i>P</i> value    | Adjust <i>P</i> value<br>(Bonferroni correction) |
|---------------------|------------------------------------------------------------------|------------------------|--------------------------------------------------|
| REACTOME_21.03.2014 | HIV Infection                                                    | $3.13 \times 10^{-23}$ | $1.57 \times 10^{-20}$                           |
| REACTOME_21.03.2014 | HIV Life Cycle                                                   | $3.38 \times 10^{-15}$ | $1.69 \times 10^{-12}$                           |
| REACTOME_21.03.2014 | Host Interactions of HIV factors                                 | $5.20 \times 10^{-14}$ | $2.60 \times 10^{-11}$                           |
| REACTOME_21.03.2014 | Disease                                                          | $1.09 \times 10^{-13}$ | $5.42 \times 10^{-11}$                           |
| REACTOME_21.03.2014 | Processing of Capped Intron-Containing Pre-mRNA                  | $2.25 \times 10^{-13}$ | $1.12 \times 10^{-10}$                           |
| REACTOME_21.03.2014 | Late Phase of HIV Life Cycle                                     | $1.33 \times 10^{-12}$ | $6.63 \times 10^{-10}$                           |
| REACTOME_21.03.2014 | Immune System                                                    | $1.10 \times 10^{-11}$ | $5.46 \times 10^{-9}$                            |
| REACTOME_21.03.2014 | Antiviral mechanism by IFN-stimulated genes                      | $7.60 \times 10^{-11}$ | $3.76 \times 10^{-8}$                            |
| REACTOME_21.03.2014 | ISG15 antiviral mechanism                                        | $7.60 \times 10^{-11}$ | $3.76 \times 10^{-8}$                            |
| REACTOME_21.03.2014 | Nuclear Envelope Breakdown                                       | $3.42 \times 10^{-10}$ | $1.69 \times 10^{-7}$                            |
| REACTOME_21.03.2014 | mRNA Splicing - Minor Pathway                                    | $6.57 \times 10^{-10}$ | $3.24 \times 10^{-7}$                            |
| REACTOME_21.03.2014 | Latent infection of Homo sapiens with Mycobacterium tuberculosis | $1.08 \times 10^{-9}$  | $5.31 \times 10^{-7}$                            |
| REACTOME_21.03.2014 | Phagosomal maturation (early endosomal stage)                    | $1.08 \times 10^{-9}$  | $5.31 \times 10^{-7}$                            |
| REACTOME_21.03.2014 | Nuclear Pore Complex (NPC) Disassembly                           | $4.37 \times 10^{-9}$  | $2.15 \times 10^{-6}$                            |
| REACTOME_21.03.2014 | Insulin receptor recycling                                       | $5.06 \times 10^{-9}$  | $2.48 \times 10^{-6}$                            |
| REACTOME_21.03.2014 | Transcriptional Regulation of White Adipocyte Differentiation    | $5.44 \times 10^{-9}$  | $2.66 \times 10^{-6}$                            |

---

|                     |                                                                     |                       |                       |
|---------------------|---------------------------------------------------------------------|-----------------------|-----------------------|
| REACTOME_21.03.2014 | Activation of NF-kappaB in B Cells                                  | $7.31 \times 10^{-9}$ | $3.57 \times 10^{-6}$ |
| REACTOME_21.03.2014 | Regulation of mRNA Stability by Proteins that Bind AU-rich Elements | $7.74 \times 10^{-9}$ | $3.77 \times 10^{-6}$ |
| REACTOME_21.03.2014 | Cytokine Signaling in Immune system                                 | $9.45 \times 10^{-9}$ | $4.59 \times 10^{-6}$ |
| REACTOME_21.03.2014 | Transport of Ribonucleoproteins into the Host Nucleus               | $1.55 \times 10^{-8}$ | $7.51 \times 10^{-6}$ |

---
