# Supplementary material for: Systems Biology-Based Investigation of Cellular Antiviral Drug Targets Identified by Gene-Trap Insertional Mutagenesis
Source: PubMed Central journal article supplement (PMC5025164; doi:10.1371/journal.pcbi.1005074), 2016-09-15
Supplement: pcbi.1005074.s007.pdf [file pcbi.1005074.s007.pdf]

**S6 Table.** Top 20 significantly enriched KEGG pathways for 615 potentially druggable host genes identified in previous RNAi screens and our gene-trap insertional mutagenesis studies.

| Pathway Source  | GO Term                                      | Term <i>P</i> value    | Adjust <i>P</i> value<br>(Bonferroni correction) |
|-----------------|----------------------------------------------|------------------------|--------------------------------------------------|
| KEGG_09.11.2015 | Epstein-Barr virus infection                 | $9.75 \times 10^{-15}$ | $2.01 \times 10^{-12}$                           |
| KEGG_09.11.2015 | Chronic myeloid leukemia                     | $2.28 \times 10^{-12}$ | $4.68 \times 10^{-10}$                           |
| KEGG_09.11.2015 | Pathways in cancer                           | $2.50 \times 10^{-11}$ | $5.10 \times 10^{-9}$                            |
| KEGG_09.11.2015 | Proteasome                                   | $4.27 \times 10^{-11}$ | $8.67 \times 10^{-9}$                            |
| KEGG_09.11.2015 | Prostate cancer                              | $6.30 \times 10^{-11}$ | $1.27 \times 10^{-8}$                            |
| KEGG_09.11.2015 | Pancreatic cancer                            | $7.28 \times 10^{-11}$ | $1.46 \times 10^{-8}$                            |
| KEGG_09.11.2015 | Prolactin signaling pathway                  | $5.38 \times 10^{-10}$ | $1.08 \times 10^{-7}$                            |
| KEGG_09.11.2015 | Osteoclast differentiation                   | $5.50 \times 10^{-10}$ | $1.10 \times 10^{-7}$                            |
| KEGG_09.11.2015 | Estrogen signaling pathway                   | $9.18 \times 10^{-10}$ | $1.82 \times 10^{-7}$                            |
| KEGG_09.11.2015 | Neurotrophin signaling pathway               | $1.06 \times 10^{-9}$  | $2.09 \times 10^{-7}$                            |
| KEGG_09.11.2015 | ErbB signaling pathway                       | $1.17 \times 10^{-9}$  | 2.30E-07                                         |
| KEGG_09.11.2015 | T cell receptor signaling pathway            | $3.02 \times 10^{-9}$  | $5.90 \times 10^{-7}$                            |
| KEGG_09.11.2015 | Central carbon metabolism in cancer          | $4.53 \times 10^{-9}$  | $8.79 \times 10^{-7}$                            |
| KEGG_09.11.2015 | Non-alcoholic fatty liver disease<br>(NAFLD) | $6.27 \times 10^{-9}$  | $1.21 \times 10^{-6}$                            |
| KEGG_09.11.2015 | Proteoglycans in cancer                      | $1.25 \times 10^{-8}$  | $2.40 \times 10^{-6}$                            |
| KEGG_09.11.2015 | Glioma                                       | $1.52 \times 10^{-8}$  | $2.90 \times 10^{-6}$                            |
| KEGG_09.11.2015 | PI3K-Akt signaling pathway                   | $1.55 \times 10^{-8}$  | $2.94 \times 10^{-6}$                            |

---

|                 |                        |                       |                       |
|-----------------|------------------------|-----------------------|-----------------------|
| KEGG_09.11.2015 | Influenza A            | $2.47 \times 10^{-8}$ | $4.67 \times 10^{-6}$ |
| KEGG_09.11.2015 | MAPK signaling pathway | $4.52 \times 10^{-8}$ | $8.50 \times 10^{-6}$ |
| KEGG_09.11.2015 | Viral carcinogenesis   | $5.28 \times 10^{-8}$ | $9.88 \times 10^{-6}$ |

---
