# Supplementary material for: Systems Biology-Based Investigation of Cellular Antiviral Drug Targets Identified by Gene-Trap Insertional Mutagenesis
Source: PubMed Central journal article supplement (PMC5025164; doi:10.1371/journal.pcbi.1005074), 2016-09-15
Supplement: pcbi.1005074.s010.pdf [file pcbi.1005074.s010.pdf]

**S9 Table.** Anti-HIV activities of top 20 predicted candidates based on the evidence from literatures.

| Predicted drug names   | p-value   | Adjusted p-value | Refs of Anti-HIV activity | Ranks |
|------------------------|-----------|------------------|---------------------------|-------|
| camptothecin           | 0.0000609 | 0.003715         | [1,2]                     | Top1  |
| sertaconazole          | 0.0000939 | 0.005728         | NA                        | Top2  |
| alsterpaullone         | 0.0001745 | 0.010642         | [3]                       | Top3  |
| lycorine               | 0.0002327 | 0.014195         | [4]                       | Top4  |
| sanguinarine           | 0.000319  | 0.01946          | [5]                       | Top5  |
| testosterone           | 0.0006199 | 0.037815         | NA                        | Top6  |
| amylocaine             | 0.000741  | 0.045201         | NA                        | Top7  |
| 2,6-dimethylpiperidine | 0.0007523 | 0.04589          | NA                        | Top8  |
| triprolidine           | 0.0009069 | 0.055322         | NA                        | Top9  |
| fursultiamine          | 0.0009652 | 0.058877         | [6]                       | Top10 |
| trichostatin A         | 0.0011253 | 0.068646         | [7]                       | Top11 |
| doxorubicin            | 0.0011878 | 0.071269         | [8]                       | Top12 |
| cobalt chloride        | 0.0012114 | 0.073893         | NA                        | Top13 |
| fulvestrant            | 0.0012775 | 0.07793          | NA                        | Top14 |
| promethazine           | 0.0013481 | 0.080886         | [9,10]                    | Top15 |
| viomycin               | 0.0013504 | 0.082375         | NA                        | Top16 |
| 8-azaguanine           | 0.0016932 | 0.103283         | [11]                      | Top17 |
| 0179445-0000           | 0.0019612 | 0.119631         | NA                        | Top18 |
| chlorphenesin          | 0.0022216 | 0.135518         | NA                        | Top19 |
| staurosporine          | 0.0023821 | 0.145307         | [12,13]                   | Top20 |

## References

1. Priel E, Showalter SD, Blair DG (1991) Inhibition of human immunodeficiency virus (HIV-1) replication in vitro by noncytotoxic doses of camptothecin, a topoisomerase I inhibitor. *AIDS Res Hum Retroviruses* 7: 65-72.
2. Li CJ, Wang C, Pardee AB (1994) Camptothecin inhibits Tat-mediated transactivation of type 1 human immunodeficiency virus. *J Biol Chem* 269: 7051-7054.
3. Guendel I, Agbottah ET, Kehn-Hall K, Kashanchi F (2010) Inhibition of human immunodeficiency virus type-1 by cdk inhibitors. *AIDS Res Ther* 7: 7. doi: 10.1186/1742-6405-7-7 PMID: 2852372.
4. Szlavik L, Gyuris A, Minarovits J, Forgo P, Molnar J, et al. (2004) Alkaloids from *Leucosium vernum* and antiretroviral activity of Amaryllidaceae alkaloids. *Planta Med* 70: 871-873. doi: 10.1055/s-2004-827239
5. Tan GT, Pezzuto JM, Kinghorn AD, Hughes SH (1991) Evaluation of natural products as inhibitors of human immunodeficiency virus type 1 (HIV-1) reverse transcriptase. *J Nat Prod* 54: 143-154.
6. Shoji S, Furuishi K, Misumi S, Miyazaki T, Kino M, et al. (1994) Thiamine disulfide as a potent inhibitor of human immunodeficiency virus (type-1) production. *Biochem Biophys Res Commun* 205: 967-975. doi: 10.1006/bbrc.1994.2760.
7. Kiernan RE, Vanhulle C, Schiltz L, Adam E, Xiao H, et al. (1999) HIV-1 tat transcriptional activity is regulated by acetylation. *EMBO J* 18: 6106-6118. doi: 10.1093/emboj/18.21.6106 PMID: 1171675.
8. Johansson S, Goldenberg DM, Griffiths GL, Wahren B, Hinkula J (2006) Elimination of HIV-1 infection by treatment with a doxorubicin-conjugated anti-envelope antibody. *AIDS* 20: 1911-1915. doi: 10.1097/01.aids.0000247111.58961.60.
9. Lu W, Achour A, Arlie M, Cao L, Andrieu JM (2001) Enhanced dendritic cell-driven proliferation and anti-HIV activity of CD8(+) T cells by a new phenothiazine derivative, aminoperazine. *J Immunol* 167: 2929-2935.
10. Aszalos A (2003) Phenothiazines in treatment of HIV infection (a review). *Acta Microbiol Immunol Hung* 50: 43-53. doi: 10.1556/AMicr.50.2003.1.5.
11. Wong RW, Balachandran A, Haaland M, Stoilov P, Cochrane A (2013) Characterization of novel inhibitors of HIV-1 replication that function via alteration of viral RNA processing and rev function. *Nucleic Acids Res* 41: 9471-9483. doi: 10.1093/nar/gkt727 PMID: 3814367.
12. Anizon F, Moreau P, Sancelme M, Voltaire A, Prudhomme M, et al. (1998) Syntheses,

biochemical and biological evaluation of staurosporine analogues from the microbial metabolite rebeccamycin. *Bioorg Med Chem* 6: 1597-1604.

13. Aranda-Anzaldo A, Viza D (1992) Human immunodeficiency virus type 1 productive infection in staurosporine-blocked quiescent cells. *FEBS Lett* 308: 170-174.
