# Supplementary material for: Systems Biology-Based Investigation of Cellular Antiviral Drug Targets Identified by Gene-Trap Insertional Mutagenesis
Source: PLoS Comput Biol. 2016 Sep 15;12(9):e1005074. doi: 10.1371/journal.pcbi.1005074 (PMC5025164; doi:10.1371/journal.pcbi.1005074)
Supplement: S5 Table — (XLSX) [file pcbi.1005074.s006.xlsx]

## Sheet: Virus cancer
Gene symbol	Cancer type abbreviations	Cancer names	References
ABCB1	GBM	Glioblastoma_multiforme	doi:10.1016/j.cell.2013.09.034
AKT1	BRCA	Breast	doi:10.1038/nature11412
AKT1	UCEC	Endometrial	doi:10.1038/nature12113
CD70	DLBCL	Diffuse_large_B-cell_lymphoma	doi:10.1038/nature12912
CDH9	GBM	Glioblastoma_multiforme	doi:10.1016/j.cell.2013.09.034
CTCF	BRCA	Breast	doi:10.1038/nature11412
CTCF	HNSC	Head_and_neck	doi:10.1126/science.1208130
CTCF	UCEC	Endometrial	doi:10.1038/nature12113
CUX1	UCEC	Endometrial	doi:10.1038/nature12113
DDX5	GBM	Glioblastoma_multiforme	doi:10.1016/j.cell.2013.09.034
EGFR	GBM	Glioblastoma_multiforme	doi:10.1016/j.cell.2013.09.034
EGFR	LUAD	Lung_adenocarcinoma	doi:10.1016/j.cell.2012.08.024
GPS2	BRCA	Breast	doi:10.1038/nature11412
HNRNPK	LAML	Acute_myeloid_leukemia	doi:10.1056/NEJMoa1301689
IDH1	GBM	Glioblastoma_multiforme	doi:10.1016/j.cell.2013.09.034
IDH1	LAML	Acute_myeloid_leukemia	doi:10.1056/NEJMoa1301689
IDH1	MM	Multiple_myeloma	doi:10.1038/nature12912
INTS12	MM	Multiple_myeloma	doi:10.1038/nature12912
KEL	GBM	Glioblastoma_multiforme	doi:10.1016/j.cell.2013.09.034
LIMCH1	UCEC	Endometrial	doi:10.1038/nature12113
MICALCL	UCEC	Endometrial	doi:10.1038/nature12113
MTOR	KIRC	Kidney_clear_cell	doi:10.1038/nature12222
NCOR1	BRCA	Breast	doi:10.1038/nature11412
PARD6B	GBM	Glioblastoma_multiforme	doi:10.1016/j.cell.2013.09.034
PBRM1	KIRC	Kidney_clear_cell	doi:10.1038/nature12222
PCBP1	CRC	Colorectal	doi:10.1038/nature12912
RBMX	UCEC	Endometrial	doi:10.1038/nature12113
RHOA	BLCA	Bladder	doi:10.1038/nature12965
RHOA	HNSC	Head_and_neck	doi:10.1126/science.1208130
RHOA	Gastric	Gastric	doi:10.1038/ng.2983
SEMA3C	GBM	Glioblastoma_multiforme	doi:10.1016/j.cell.2013.09.034
SLC1A3	UCEC	Endometrial	doi:10.1038/nature12113
SLC44A3	UCEC	Endometrial	doi:10.1038/nature12113
SPEN	BRCA	Breast	doi:10.1038/nature11412
TAF1	UCEC	Endometrial	doi:10.1038/nature12113
TBL1XR1	BRCA	Breast	doi:10.1038/nature11412
TBL1XR1	UCEC	Endometrial	doi:10.1038/nature12113
USP9X	UCEC	Endometrial	doi:10.1038/nature12113
WBSCR17	COAD	Colorectal	doi:10.1038/nature11252
XPO1	CLL	Chronic_lymphocytic_leukemia	doi:10.1038/nature12912

## Sheet: virus-host
Gene symbol	HUGO gene ID	Gene name	Cellular localization	Associated pathogen
ABCB1	5243	ATP-binding cassette, sub-family B (MDR/TAP), member 1	Plasma-Membrane	Reovirus
AKT1	207	v-akt murine thymoma viral oncogene homolog 1	Cytoplasm	HIV-1
CD70	970	CD70 molecule	Extracellular-Space	Polio
CDH9	1007	cadherin 9, type 2 (T1-cadherin)	Plasma-Membrane	HSV-2
CDH9	1007	cadherin 9, type 2 (T1-cadherin)	Plasma-Membrane	Rhinovirus-16
CTCF	10664	CCCTC-binding factor (zinc finger protein)	Nucleus	Reovirus
CUX1	1523	cut-like homeobox 1	Nucleus	Reovirus
DDX5	1655	DEAD (Asp-Glu-Ala-Asp) box helicase 5	Nucleus	HSV-2
EGFR	1956	epidermal growth factor receptor	Plasma-Membrane	HIV-1
GPS2	2874	G protein pathway suppressor 2	Nucleus	HIV-1
HNRNPK	3190	heterogeneous nuclear ribonucleoprotein K	Nucleus	HSV-2
IDH1	3417	isocitrate dehydrogenase 1 (NADP+), soluble	Cytoplasm	HIV-1
KEL	3792	Kell blood group, metallo-endopeptidase	Plasma-Membrane	HIV-1
LIMCH1	22998	LIM and calponin homology domains 1	Unknown	Rhinovirus-16
MICALCL	84953	MICAL C-terminal like	Cytoplasm	Reovirus
MTOR	2475	mechanistic target of rapamycin (serine/threonine kinase)	Ubiquitous	HSV-2
PARD6B	84612	par-6 partitioning defective 6 homolog beta (C. elegans)	Plasma-Membrane	HSV-2
PBRM1	55193	polybromo 1	Nucleus	Marburg
RBMX	27316	RNA binding motif protein, X-linked	Nucleus	HSV-2
RHOA	387	ras homolog family member A	Cytoplasm	Cowpox
RHOA	387	ras homolog family member A	Cytoplasm	HSV-2
SEMA3C	10512	sema domain, immunoglobulin domain (Ig), short basic domain, secreted, (semaphorin) 3C	Extracellular-Space	HSV-2
SLC1A3	6507	solute carrier family 1 (glial high affinity glutamate transporter), member 3	Plasma-Membrane	Rhinovirus-16
SLC44A3	126969	solute carrier family 44, member 3	Membrane	HIV-1
SLC44A3	126969	solute carrier family 44, member 3	Membrane	Marburg
SPEN	23013	spen homolog, transcriptional regulator (Drosophila)	Nucleus	Polio
TAF1	6872	TAF1 RNA polymerase II, TATA box binding protein (TBP)-associated factor, 250kDa	Nucleus	Rhinovirus-16
USP9X	8239	ubiquitin specific peptidase 9, X-linked	Cytoplasm	Marburg
WBSCR17	64409	Williams-Beuren syndrome chromosome region 17	Cytoplasm	HIV-1
XPO1	7514	exportin 1 (CRM1 homolog, yeast)	Nucleus	C.perfringens-epsilon-toxin

## Sheet: Innate PPI
Virus target gene symbol	Interacting proteins from INPIN network (Nucleic Acids Res, 2013, 41, D1228-1233).
AKAP13	RHOA
AKT1	IRAK1
AKT1	IL1R1
AKT1	GSK3B
AKT1	MAPK8IP1
AKT1	MAP2K4
AKT1	BAD
AKT1	CHUK
AKT1	PDK1
AKT1	PAK1
AKT1	PTPN1
AKT1	ACAP1
AKT1	MAPKAP1
AKT1	APPL1
AKT1	PHLPP2
AKT1	SETDB1
AKT1	PLEKHO1
AKT1	SH3RF1
AKT1	WEE1
AKT1	NPM1
AKT1	PAWR
AKT1	CCDC88A
AKT1	IMPDH2
AKT1	HSP90AB1
AKT1	AK1
AKT1	YBX1
AKT1	SRC
AKT1	PRKCD
AKT1	METTL1
AKT1	BCL10
AKT1	SMARCC2
AKT1	SMARCC1
AKT1	CTNNB1
AKT1	GAB2
AKT1	MAP3K11
AKT1	MAP3K5
AKT1	CLIP3
AKT1	TBC1D4
AKT1	AKT1S1
AKT1	ATXN1
AKT1	YWHAZ
AKT1	AR
AKT1	BAX
AKT1	GATA1
AKT1	GATA2
AKT1	NUAK1
AKT1	PDCD4
AKT1	PEA15
AKT1	PFKFB3
AKT1	TP53RK
AKT1	SYTL1
AKT1	BCL2L11
AKT1	FOXO1
AKT1	FOXO4
AKT1	MDM2
AKT1	PTK6
AKT1	THEM4
AKT1	CASP3
AKT1	STK4
AKT1	IRF3
AKT1	TBK1
AKT1	STAU1
AKT1S1	MTOR
ATG13	MTOR
CALM1	EGFR
CARHSP1	AKT1
CD40	NCOR1
CDKN1B	CDK2
CDKN1B	SGK1
CDKN1B	TSC2
CDKN1B	TSC1
CDKN1B	YWHAQ
CDKN1B	YWHAB
CDKN1B	AKT1
CDKN1B	SFN
CDKN1B	GRB2
CDKN1B	PIN1
CLIP1	MTOR
CSDC2	AKT1
CTNNB1	RBMX
CTNND2	AKT1
DAP	MTOR
EGFR	TLR2
EGFR	TLR4
EGFR	CDH1
EGFR	PTPN11
EGFR	STAT1
EGFR	STAT3
EGFR	JAK1
EGFR	JAK2
EGFR	PTK2B
EGFR	SRC
EGFR	SOCS5
EGFR	PTPN1
EGFR	CASP1
EGFR	CASP3
EGFR	CASP7
EGFR	ERRFI1
EGFR	MUC1
EGFR	GRB2
EGFR	CAV1
EGFR	CAV2
EGFR	CLTA
EGFR	HOXC10
EGFR	LYN
EGFR	S100A7
EGFR	S100A9
EGFR	SEC13
EGFR	SFN
EGFR	SLC3A2
EGFR	ATP1A1
EGFR	ATP1B1
EGFR	ALCAM
EGFR	ICAM1
EGFR	TUBA1A
EIF3B	MTOR
EIF4EBP1	MTOR
ERAP1	RBMX
FKBP1A	MTOR
FKBP8	MTOR
GAPDH	XPO1
GAPDH	EGFR
GPHN	MTOR
GPS2	EMD
GRB10	AKT1
GZMA	HNRNPK
GZMK	HNRNPK
HNRNPK	MDM2
HNRNPK	TP53
HSP90AA1	AKT1
HSPA1B	MTOR
HTT	AKT1
IRAK2	AKT1
IRF5	XPO1
IRS1	MTOR
ITGB1	AKT1
ITGB4	EGFR
KRT10	AKT1
MAPKAP1	MTOR
MAVS	PCBP1
MLST8	MTOR
MTOR	TRAF2
MTOR	RRAGC
MTOR	SGK1
MTOR	ABL1
MTOR	CHUK
MTOR	IKBKB
MTOR	IKBKG
NCOR1	TAB2
NCOR1	ERBB4
NCOR1	SQSTM1
NCOR1	EMD
NFKBIA	NCOR1
PAK1	SPEN
PARD6B	PRKCZ
PARD6B	CDC42
PCBP1	GFI1
PCBP1	DDX58
PCBP1	IFIH1
PHLPP1	AKT1
PML	MTOR
PPARGC1A	AKT1
PREX1	MTOR
PREX2	MTOR
PRKAR1A	MTOR
PRKCD	MTOR
PRKCI	PARD6B
PRKCZ	AKT1
PRR5	MTOR
PRR5L	MTOR
RAC1	PARD6B
RAF1	AKT1
RAP1GDS1	RHOA
RBMX	KHDRBS2
RHEB	MTOR
RHEBL1	MTOR
RHOA	RTKN
RHOA	ARHGDIA
RICTOR	AKT1
RICTOR	MTOR
RPS6KB1	MTOR
RPTOR	MTOR
RRAGB	MTOR
SKP2	CDKN1B
SMARCB1	AKT1
SOCS4	EGFR
STAT1	MTOR
STAT3	MTOR
TBL1XR1	EMD
TBL1XR1	SKI
TCL1A	AKT1
TELO2	MTOR
TSC2	AKT1
TSC2	MTOR
UBQLN1	MTOR
ULK1	MTOR
ULK2	MTOR
USP9X	ITCH
USP9X	IKBKAP
XPO1	FOXO4
XPO1	NFKBIE
XPO1	IRF3
YWHAE	PCBP1
YWHAE	CDKN1B
YWHAH	CDKN1B
YWHAQ	MTOR
YWHAZ	MTOR

## Sheet: 384 cancer mutated genes
Gene_symbol	Entrez_ID	Cancer type abbreviations	Cancer names	DOI
ABCB1	5243	GBM	Glioblastoma_multiforme	doi:10.1016/j.cell.2013.09.034
ABCB5	340273	LUAD	Lung_adenocarcinoma	doi:10.1016/j.cell.2012.08.024
ABCC9	10060	GBM	Glioblastoma_multiforme	doi:10.1016/j.cell.2013.09.034
ACO1	48	MEL	Melanoma	doi:10.1038/nature12912
ACVR1B	91	COAD	Colorectal	doi:10.1038/nature11252
ACVR1B	91	CRC	Colorectal	doi:10.1038/nature12912
ACVR2A	92	Gastric	Gastric	doi:10.1038/ng.2983
ADAM29	11086	GBM	Glioblastoma_multiforme	doi:10.1016/j.cell.2013.09.034
ADNP	23394	UCEC	Endometrial	doi:10.1038/nature12113
AFF2	2334	BRCA	Breast	doi:10.1038/nature11412
AFM	173	GBM	Glioblastoma_multiforme	doi:10.1016/j.cell.2013.09.034
AJUBA	84962	HNSC	Head_and_neck	doi:10.1126/science.1208130
AKAP3	10566	BRCA	Breast	doi:10.1038/nature11412
AKT1	207	BRCA	Breast	doi:10.1038/nature11412
AKT1	207	UCEC	Endometrial	doi:10.1038/nature12113
ALKBH6	84964	UCEC	Endometrial	doi:10.1038/nature12113
ALPK2	115701	MEL	Melanoma	doi:10.1038/nature12912
AMER1	139285	COAD	Colorectal	doi:10.1038/nature11252
AMY2B	280	UCEC	Endometrial	doi:10.1038/nature12113
ANK3	288	UCEC	Endometrial	doi:10.1038/nature12113
ANKRD36	375248	GBM	Glioblastoma_multiforme	doi:10.1016/j.cell.2013.09.034
APC	324	COAD	Colorectal	doi:10.1038/nature11252
APC	324	CRC	Colorectal	doi:10.1038/nature12912
ARHGAP35	2909	UCEC	Endometrial	doi:10.1038/nature12113
ARID1A	8289	BLCA	Bladder	doi:10.1038/nature12965
ARID1A	8289	BRCA	Breast	doi:10.1038/nature11412
ARID1A	8289	CRC	Colorectal	doi:10.1038/nature12912
ARID1A	8289	KIRC	Kidney_clear_cell	doi:10.1038/nature12222
ARID1A	8289	LUAD	Lung_adenocarcinoma	doi:10.1016/j.cell.2012.08.024
ARID1A	8289	LUSC	Lung_squamous_cell_carcinoma	doi:10.1038/nature11404
ARID1A	8289	UCEC	Endometrial	doi:10.1038/nature12113
ARID1A	8289	Gastric	Gastric	doi:10.1038/ng.2983
ARID5B	84159	UCEC	Endometrial	doi:10.1038/nature12113
ATM	472	KIRC	Kidney_clear_cell	doi:10.1038/nature12222
ATM	472	LUAD	Lung_adenocarcinoma	doi:10.1016/j.cell.2012.08.024
ATM	472	PRAD	Prostate	doi:10.1038/nature12912
ATN1	1822	BRCA	Breast	doi:10.1038/nature11412
ATP2B2	491	BRCA	Breast	doi:10.1038/nature11412
ATP6V0D2	245972	COAD	Colorectal	doi:10.1038/nature11252
ATR	545	UCEC	Endometrial	doi:10.1038/nature12113
ATRX	546	GBM	Glioblastoma_multiforme	doi:10.1016/j.cell.2013.09.034
AXIN2	8313	CRC	Colorectal	doi:10.1038/nature12912
AZGP1	563	GBM	Glioblastoma_multiforme	doi:10.1016/j.cell.2013.09.034
B2M	567	CRC	Colorectal	doi:10.1038/nature12912
B2M	567	HNSC	Head_and_neck	doi:10.1126/science.1208130
BAP1	8314	KIRC	Kidney_clear_cell	doi:10.1038/nature12222
BCLAF1	9774	MEL	Melanoma	doi:10.1038/nature12912
BCOR	54880	UCEC	Endometrial	doi:10.1038/nature12113
BRAF	673	COAD	Colorectal	doi:10.1038/nature11252
BRAF	673	CRC	Colorectal	doi:10.1038/nature12912
BRAF	673	DLBCL	Diffuse_large_B-cell_lymphoma	doi:10.1038/nature12912
BRAF	673	GBM	Glioblastoma_multiforme	doi:10.1016/j.cell.2013.09.034
BRAF	673	LUAD	Lung_adenocarcinoma	doi:10.1016/j.cell.2012.08.024
BRAF	673	MEL	Melanoma	doi:10.1038/nature12912
BRAF	673	MM	Multiple_myeloma	doi:10.1038/nature12912
BRCA1	672	OV	Ovarian	doi:10.1038/nature10166
BRCA2	675	OV	Ovarian	doi:10.1038/nature10166
BTG2	7832	BLCA	Bladder	doi:10.1038/nature12965
BTNL3	10917	KIRC	Kidney_clear_cell	doi:10.1038/nature12222
C3orf70	285382	BLCA	Bladder	doi:10.1038/nature12965
CALCR	799	GBM	Glioblastoma_multiforme	doi:10.1016/j.cell.2013.09.034
CAP2	10486	UCEC	Endometrial	doi:10.1038/nature12113
CARD11	84433	DLBCL	Diffuse_large_B-cell_lymphoma	doi:10.1038/nature12912
CARD6	84674	GBM	Glioblastoma_multiforme	doi:10.1016/j.cell.2013.09.034
CASP8	841	BRCA	Breast	doi:10.1038/nature11412
CASP8	841	COAD	Colorectal	doi:10.1038/nature11252
CASP8	841	CRC	Colorectal	doi:10.1038/nature12912
CASP8	841	HNSC	Head_and_neck	doi:10.1126/science.1208130
CBFB	865	BRCA	Breast	doi:10.1038/nature11412
CCDC120	90060	KIRC	Kidney_clear_cell	doi:10.1038/nature12222
CCDC6	8030	UCEC	Endometrial	doi:10.1038/nature12113
CCNB2	9133	KIRC	Kidney_clear_cell	doi:10.1038/nature12222
CCND1	595	UCEC	Endometrial	doi:10.1038/nature12113
CCND3	896	BLCA	Bladder	doi:10.1038/nature12965
CCND3	896	BRCA	Breast	doi:10.1038/nature11412
CD1D	912	GBM	Glioblastoma_multiforme	doi:10.1016/j.cell.2013.09.034
CD3EAP	10849	GBM	Glioblastoma_multiforme	doi:10.1016/j.cell.2013.09.034
CD70	970	DLBCL	Diffuse_large_B-cell_lymphoma	doi:10.1038/nature12912
CD79B	974	DLBCL	Diffuse_large_B-cell_lymphoma	doi:10.1038/nature12912
CDC27	996	COAD	Colorectal	doi:10.1038/nature11252
CDC27	996	CRC	Colorectal	doi:10.1038/nature12912
CDH1	999	BRCA	Breast	doi:10.1038/nature11412
CDH1	999	Gastric	Gastric	doi:10.1038/ng.2983
CDH18	1016	GBM	Glioblastoma_multiforme	doi:10.1016/j.cell.2013.09.034
CDH19	28513	UCEC	Endometrial	doi:10.1038/nature12113
CDH9	1007	GBM	Glioblastoma_multiforme	doi:10.1016/j.cell.2013.09.034
CDHR3	222256	GBM	Glioblastoma_multiforme	doi:10.1016/j.cell.2013.09.034
CDK12	51755	OV	Ovarian	doi:10.1038/nature10166
CDK4	1019	MEL	Melanoma	doi:10.1038/nature12912
CDKN1A	1026	BLCA	Bladder	doi:10.1038/nature12965
CDKN1A	1026	LUAD	Lung_adenocarcinoma	doi:10.1016/j.cell.2012.08.024
CDKN1B	1027	BRCA	Breast	doi:10.1038/nature11412
CDKN2A	1029	BLCA	Bladder	doi:10.1038/nature12965
CDKN2A	1029	ESO	Esophageal_adenocarcinoma	doi:10.1038/nature12912
CDKN2A	1029	HNSC	Head_and_neck	doi:10.1126/science.1208130
CDKN2A	1029	LUAD	Lung_adenocarcinoma	doi:10.1016/j.cell.2012.08.024
CDKN2A	1029	LUSC	Lung_squamous_cell_carcinoma	doi:10.1038/nature11404
CDKN2A	1029	MEL	Melanoma	doi:10.1038/nature12912
CDX4	1046	GBM	Glioblastoma_multiforme	doi:10.1016/j.cell.2013.09.034
CEBPA	1050	LAML	Acute_myeloid_leukemia	doi:10.1056/NEJMoa1301689
CHD4	1108	UCEC	Endometrial	doi:10.1038/nature12113
CHD8	57680	GBM	Glioblastoma_multiforme	doi:10.1016/j.cell.2013.09.034
CLEC19A	728276	BRCA	Breast	doi:10.1038/nature11412
COL11A1	1301	UCEC	Endometrial	doi:10.1038/nature12113
COL1A2	1278	GBM	Glioblastoma_multiforme	doi:10.1016/j.cell.2013.09.034
COL5A1	1289	ESO	Esophageal_adenocarcinoma	doi:10.1038/nature12912
CREBBP	1387	BLCA	Bladder	doi:10.1038/nature12965
CREBBP	1387	DLBCL	Diffuse_large_B-cell_lymphoma	doi:10.1038/nature12912
CSDE1	7812	UCEC	Endometrial	doi:10.1038/nature12113
CSMD3	114788	OV	Ovarian	doi:10.1038/nature10166
CSMD3	114788	UCEC	Endometrial	doi:10.1038/nature12113
CTCF	10664	BRCA	Breast	doi:10.1038/nature11412
CTCF	10664	HNSC	Head_and_neck	doi:10.1126/science.1208130
CTCF	10664	UCEC	Endometrial	doi:10.1038/nature12113
CTNNA2	1496	Gastric	Gastric	doi:10.1038/ng.2983
CTNNB1	1499	COAD	Colorectal	doi:10.1038/nature11252
CTNNB1	1499	UCEC	Endometrial	doi:10.1038/nature12113
CUL4B	8450	BRCA	Breast	doi:10.1038/nature11412
CUX1	1523	UCEC	Endometrial	doi:10.1038/nature12113
CXorf22	170063	GBM	Glioblastoma_multiforme	doi:10.1016/j.cell.2013.09.034
DACH1	1602	LUAD	Lung_adenocarcinoma	doi:10.1016/j.cell.2012.08.024
DCAF12L2	340578	GBM	Glioblastoma_multiforme	doi:10.1016/j.cell.2013.09.034
DCAF4L2	138009	BRCA	Breast	doi:10.1038/nature11412
DCLK1	9201	Gastric	Gastric	doi:10.1038/ng.2983
DDX5	1655	GBM	Glioblastoma_multiforme	doi:10.1016/j.cell.2013.09.034
DGKG	1608	BRCA	Breast	doi:10.1038/nature11412
DIAPH1	1729	UCEC	Endometrial	doi:10.1038/nature12113
DIS3	22894	MM	Multiple_myeloma	doi:10.1038/nature12912
DMD	1756	COAD	Colorectal	doi:10.1038/nature11252
DNER	92737	UCEC	Endometrial	doi:10.1038/nature12113
DNMT3A	1788	LAML	Acute_myeloid_leukemia	doi:10.1056/NEJMoa1301689
DRD5	1816	GBM	Glioblastoma_multiforme	doi:10.1016/j.cell.2013.09.034
DYNC1I1	1780	GBM	Glioblastoma_multiforme	doi:10.1016/j.cell.2013.09.034
EDNRB	1910	COAD	Colorectal	doi:10.1038/nature11252
EGFR	1956	GBM	Glioblastoma_multiforme	doi:10.1016/j.cell.2013.09.034
EGFR	1956	LUAD	Lung_adenocarcinoma	doi:10.1016/j.cell.2012.08.024
EIF2S2	8894	UCEC	Endometrial	doi:10.1038/nature12113
ELF3	1999	BLCA	Bladder	doi:10.1038/nature12965
ELF3	1999	CRC	Colorectal	doi:10.1038/nature12912
ELF3	1999	Gastric	Gastric	doi:10.1038/ng.2983
EP300	2033	BLCA	Bladder	doi:10.1038/nature12965
EP300	2033	HNSC	Head_and_neck	doi:10.1126/science.1208130
EP300	2033	UCEC	Endometrial	doi:10.1038/nature12113
EPHA2	1969	HNSC	Head_and_neck	doi:10.1126/science.1208130
EPHA3	2042	LUAD	Lung_adenocarcinoma	doi:10.1016/j.cell.2012.08.024
ERBB2	2064	BRCA	Breast	doi:10.1038/nature11412
ERBB2	2064	LUAD	Lung_adenocarcinoma	doi:10.1016/j.cell.2012.08.024
ERBB3	2065	BLCA	Bladder	doi:10.1038/nature12965
ERBB3	2065	CRC	Colorectal	doi:10.1038/nature12912
ERBB3	2065	UCEC	Endometrial	doi:10.1038/nature12113
ERCC2	2068	BLCA	Bladder	doi:10.1038/nature12965
ESR1	2099	UCEC	Endometrial	doi:10.1038/nature12113
EZH2	2146	DLBCL	Diffuse_large_B-cell_lymphoma	doi:10.1038/nature12912
EZH2	2146	LAML	Acute_myeloid_leukemia	doi:10.1056/NEJMoa1301689
EZR	7430	BLCA	Bladder	doi:10.1038/nature12965
FAM135B	51059	UCEC	Endometrial	doi:10.1038/nature12113
FAM157B	100132403	BRCA	Breast	doi:10.1038/nature11412
FAM46C	54855	MM	Multiple_myeloma	doi:10.1038/nature12912
FAM47C	442444	BRCA	Breast	doi:10.1038/nature11412
FAM5C	339479	LAML	Acute_myeloid_leukemia	doi:10.1056/NEJMoa1301689
FAT1	2195	HNSC	Head_and_neck	doi:10.1126/science.1208130
FAT1	2195	UCEC	Endometrial	doi:10.1038/nature12113
FAT3	120114	OV	Ovarian	doi:10.1038/nature10166
FAT3	120114	UCEC	Endometrial	doi:10.1038/nature12113
FBXW7	55294	BLCA	Bladder	doi:10.1038/nature12965
FBXW7	55294	COAD	Colorectal	doi:10.1038/nature11252
FBXW7	55294	CRC	Colorectal	doi:10.1038/nature12912
FBXW7	55294	LUSC	Lung_squamous_cell_carcinoma	doi:10.1038/nature11404
FBXW7	55294	UCEC	Endometrial	doi:10.1038/nature12113
FGA	2243	GBM	Glioblastoma_multiforme	doi:10.1016/j.cell.2013.09.034
FGFR2	2263	UCEC	Endometrial	doi:10.1038/nature12113
FGFR3	2261	BLCA	Bladder	doi:10.1038/nature12965
FLG	2312	ESO	Esophageal_adenocarcinoma	doi:10.1038/nature12912
FLT3	2322	LAML	Acute_myeloid_leukemia	doi:10.1056/NEJMoa1301689
FOXA1	3169	BLCA	Bladder	doi:10.1038/nature12965
FOXA1	3169	BRCA	Breast	doi:10.1038/nature11412
FOXQ1	94234	BLCA	Bladder	doi:10.1038/nature12965
FOXR2	139628	GBM	Glioblastoma_multiforme	doi:10.1016/j.cell.2013.09.034
FRMD7	90167	GBM	Glioblastoma_multiforme	doi:10.1016/j.cell.2013.09.034
FRMD7	90167	MEL	Melanoma	doi:10.1038/nature12912
FZD3	7976	COAD	Colorectal	doi:10.1038/nature11252
GABRA1	2554	GBM	Glioblastoma_multiforme	doi:10.1016/j.cell.2013.09.034
GABRA6	2559	GBM	Glioblastoma_multiforme	doi:10.1016/j.cell.2013.09.034
GABRA6	2559	OV	Ovarian	doi:10.1038/nature10166
GABRB2	2561	GBM	Glioblastoma_multiforme	doi:10.1016/j.cell.2013.09.034
GATA3	2625	BRCA	Breast	doi:10.1038/nature11412
GCSAML	148823	GBM	Glioblastoma_multiforme	doi:10.1016/j.cell.2013.09.034
GIGYF2	26058	UCEC	Endometrial	doi:10.1038/nature12113
GLI3	2737	Gastric	Gastric	doi:10.1038/ng.2983
GNA13	10672	DLBCL	Diffuse_large_B-cell_lymphoma	doi:10.1038/nature12912
GNPTAB	79158	UCEC	Endometrial	doi:10.1038/nature12113
GOT1	2805	CRC	Colorectal	doi:10.1038/nature12912
GPC5	2262	BLCA	Bladder	doi:10.1038/nature12965
GPC6	10082	COAD	Colorectal	doi:10.1038/nature11252
GPR32	2854	BRCA	Breast	doi:10.1038/nature11412
GPS2	2874	BRCA	Breast	doi:10.1038/nature11412
GPX5	2880	GBM	Glioblastoma_multiforme	doi:10.1016/j.cell.2013.09.034
GRIK3	2899	COAD	Colorectal	doi:10.1038/nature11252
GUSB	2990	KIRC	Kidney_clear_cell	doi:10.1038/nature12222
HIST1H1C	3006	BRCA	Breast	doi:10.1038/nature11412
HIST1H1E	3008	CLL	Chronic_lymphocytic_leukemia	doi:10.1038/nature12912
HIST1H2BC	8347	BRCA	Breast	doi:10.1038/nature11412
HIST1H3B	8358	BRCA	Breast	doi:10.1038/nature11412
HLA-A	3105	DLBCL	Diffuse_large_B-cell_lymphoma	doi:10.1038/nature12912
HLA-A	3105	HNSC	Head_and_neck	doi:10.1126/science.1208130
HLA-A	3105	LUSC	Lung_squamous_cell_carcinoma	doi:10.1038/nature11404
HLA-B	3106	HNSC	Head_and_neck	doi:10.1126/science.1208130
HNRNPK	3190	LAML	Acute_myeloid_leukemia	doi:10.1056/NEJMoa1301689
HORMAD1	84072	BLCA	Bladder	doi:10.1038/nature12965
HOXA7	3204	UCEC	Endometrial	doi:10.1038/nature12113
HPD	3242	UCEC	Endometrial	doi:10.1038/nature12113
HRAS	3265	BLCA	Bladder	doi:10.1038/nature12965
HRAS	3265	HNSC	Head_and_neck	doi:10.1126/science.1208130
HRAS	3265	LUSC	Lung_squamous_cell_carcinoma	doi:10.1038/nature11404
IDH1	3417	GBM	Glioblastoma_multiforme	doi:10.1016/j.cell.2013.09.034
IDH1	3417	LAML	Acute_myeloid_leukemia	doi:10.1056/NEJMoa1301689
IDH1	3417	MM	Multiple_myeloma	doi:10.1038/nature12912
IDH2	3418	LAML	Acute_myeloid_leukemia	doi:10.1056/NEJMoa1301689
IL18RAP	8807	GBM	Glioblastoma_multiforme	doi:10.1016/j.cell.2013.09.034
IL7R	3575	ESO	Esophageal_adenocarcinoma	doi:10.1038/nature12912
ING1	3621	UCEC	Endometrial	doi:10.1038/nature12113
INPP4A	3631	UCEC	Endometrial	doi:10.1038/nature12113
INPPL1	3636	UCEC	Endometrial	doi:10.1038/nature12113
INTS12	57117	MM	Multiple_myeloma	doi:10.1038/nature12912
IPO7	10527	HNSC	Head_and_neck	doi:10.1126/science.1208130
IRF4	3662	MM	Multiple_myeloma	doi:10.1038/nature12912
ITPKB	3707	DLBCL	Diffuse_large_B-cell_lymphoma	doi:10.1038/nature12912
KCNB2	9312	BRCA	Breast	doi:10.1038/nature11412
KDM5C	8242	KIRC	Kidney_clear_cell	doi:10.1038/nature12222
KDM6A	7403	BLCA	Bladder	doi:10.1038/nature12965
KEAP1	9817	LUAD	Lung_adenocarcinoma	doi:10.1016/j.cell.2012.08.024
KEAP1	9817	LUSC	Lung_squamous_cell_carcinoma	doi:10.1038/nature11404
KEL	3792	GBM	Glioblastoma_multiforme	doi:10.1016/j.cell.2013.09.034
KIAA1804	84451	COAD	Colorectal	doi:10.1038/nature11252
KIT	3815	LAML	Acute_myeloid_leukemia	doi:10.1056/NEJMoa1301689
KLF5	688	BLCA	Bladder	doi:10.1038/nature12965
KLHL8	57563	UCEC	Endometrial	doi:10.1038/nature12113
KMT2A	4297	BRCA	Breast	doi:10.1038/nature11412
KMT2C	58508	BRCA	Breast	doi:10.1038/nature11412
KMT2D	8085	BLCA	Bladder	doi:10.1038/nature12965
KMT2D	8085	DLBCL	Diffuse_large_B-cell_lymphoma	doi:10.1038/nature12912
KMT2D	8085	HNSC	Head_and_neck	doi:10.1126/science.1208130
KMT2D	8085	LUSC	Lung_squamous_cell_carcinoma	doi:10.1038/nature11404
KMT2D	8085	UCEC	Endometrial	doi:10.1038/nature12113
KRAS	3845	BRCA	Breast	doi:10.1038/nature11412
KRAS	3845	COAD	Colorectal	doi:10.1038/nature11252
KRAS	3845	CRC	Colorectal	doi:10.1038/nature12912
KRAS	3845	LAML	Acute_myeloid_leukemia	doi:10.1056/NEJMoa1301689
KRAS	3845	LUAD	Lung_adenocarcinoma	doi:10.1016/j.cell.2012.08.024
KRAS	3845	MM	Multiple_myeloma	doi:10.1038/nature12912
KRAS	3845	UCEC	Endometrial	doi:10.1038/nature12113
KRTAP20-2	337976	GBM	Glioblastoma_multiforme	doi:10.1016/j.cell.2013.09.034
LCE4A	199834	GBM	Glioblastoma_multiforme	doi:10.1016/j.cell.2013.09.034
LCTL	197021	MEL	Melanoma	doi:10.1038/nature12912
LIMCH1	22998	UCEC	Endometrial	doi:10.1038/nature12113
LOC100129108	100129108	LUAD	Lung_adenocarcinoma	doi:10.1016/j.cell.2012.08.024
LRRC55	219527	GBM	Glioblastoma_multiforme	doi:10.1016/j.cell.2013.09.034
LUM	4060	GBM	Glioblastoma_multiforme	doi:10.1016/j.cell.2013.09.034
LZTR1	8216	GBM	Glioblastoma_multiforme	doi:10.1016/j.cell.2013.09.034
MAP2K1	5604	LUAD	Lung_adenocarcinoma	doi:10.1016/j.cell.2012.08.024
MAP2K4	6416	BRCA	Breast	doi:10.1038/nature11412
MAP3K1	4214	BRCA	Breast	doi:10.1038/nature11412
MAP3K1	4214	GBM	Glioblastoma_multiforme	doi:10.1016/j.cell.2013.09.034
MAP4K3	8491	HNSC	Head_and_neck	doi:10.1126/science.1208130
MAP7	9053	COAD	Colorectal	doi:10.1038/nature11252
MECOM	2122	UCEC	Endometrial	doi:10.1038/nature12113
MED12	9968	PRAD	Prostate	doi:10.1038/nature12912
MED23	9439	BRCA	Breast	doi:10.1038/nature11412
MET	4233	LUAD	Lung_adenocarcinoma	doi:10.1016/j.cell.2012.08.024
METTL14	57721	UCEC	Endometrial	doi:10.1038/nature12113
MGA	23269	BLCA	Bladder	doi:10.1038/nature12965
MICA	100507436	BRCA	Breast	doi:10.1038/nature11412
MICALCL	84953	UCEC	Endometrial	doi:10.1038/nature12113
MIER3	166968	COAD	Colorectal	doi:10.1038/nature11252
MIR1277	100302214	UCEC	Endometrial	doi:10.1038/nature12113
MKI67	4288	UCEC	Endometrial	doi:10.1038/nature12113
MMP13	4322	GBM	Glioblastoma_multiforme	doi:10.1016/j.cell.2013.09.034
MORC4	79710	UCEC	Endometrial	doi:10.1038/nature12113
MPO	4353	KIRC	Kidney_clear_cell	doi:10.1038/nature12222
MROH2B	133558	GBM	Glioblastoma_multiforme	doi:10.1016/j.cell.2013.09.034
MSR1	4481	KIRC	Kidney_clear_cell	doi:10.1038/nature12222
MTOR	2475	KIRC	Kidney_clear_cell	doi:10.1038/nature12222
MUC17	140453	GBM	Glioblastoma_multiforme	doi:10.1016/j.cell.2013.09.034
MUC6	4588	Gastric	Gastric	doi:10.1038/ng.2983
MYB	4602	BRCA	Breast	doi:10.1038/nature11412
MYCN	4613	UCEC	Endometrial	doi:10.1038/nature12113
MYD88	4615	CLL	Chronic_lymphocytic_leukemia	doi:10.1038/nature12912
MYD88	4615	DLBCL	Diffuse_large_B-cell_lymphoma	doi:10.1038/nature12912
MYO1B	4430	COAD	Colorectal	doi:10.1038/nature11252
MYOCD	93649	MEL	Melanoma	doi:10.1038/nature12912
NBPF1	55672	LUAD	Lung_adenocarcinoma	doi:10.1016/j.cell.2012.08.024
NCOR1	9611	BRCA	Breast	doi:10.1038/nature11412
NF1	4763	BRCA	Breast	doi:10.1038/nature11412
NF1	4763	GBM	Glioblastoma_multiforme	doi:10.1016/j.cell.2013.09.034
NF1	4763	LUAD	Lung_adenocarcinoma	doi:10.1016/j.cell.2012.08.024
NF1	4763	OV	Ovarian	doi:10.1038/nature10166
NFE2L2	4780	BLCA	Bladder	doi:10.1038/nature12965
NFE2L2	4780	HNSC	Head_and_neck	doi:10.1126/science.1208130
NFE2L2	4780	KIRC	Kidney_clear_cell	doi:10.1038/nature12222
NFE2L2	4780	LUSC	Lung_squamous_cell_carcinoma	doi:10.1038/nature11404
NFE2L2	4780	UCEC	Endometrial	doi:10.1038/nature12113
NLRP5	126206	GBM	Glioblastoma_multiforme	doi:10.1016/j.cell.2013.09.034
NOTCH1	4851	HNSC	Head_and_neck	doi:10.1126/science.1208130
NOTCH1	4851	LUSC	Lung_squamous_cell_carcinoma	doi:10.1038/nature11404
NPM1	4869	LAML	Acute_myeloid_leukemia	doi:10.1056/NEJMoa1301689
NPNT	255743	KIRC	Kidney_clear_cell	doi:10.1038/nature12222
NRAS	4893	COAD	Colorectal	doi:10.1038/nature11252
NRAS	4893	CRC	Colorectal	doi:10.1038/nature12912
NRAS	4893	LAML	Acute_myeloid_leukemia	doi:10.1056/NEJMoa1301689
NRAS	4893	MEL	Melanoma	doi:10.1038/nature12912
NRAS	4893	MM	Multiple_myeloma	doi:10.1038/nature12912
NRAS	4893	UCEC	Endometrial	doi:10.1038/nature12113
NSD1	64324	HNSC	Head_and_neck	doi:10.1126/science.1208130
NTN4	59277	CRC	Colorectal	doi:10.1038/nature12912
NUP210L	91181	GBM	Glioblastoma_multiforme	doi:10.1016/j.cell.2013.09.034
ODF4	146852	GBM	Glioblastoma_multiforme	doi:10.1016/j.cell.2013.09.034
OR2G3	81469	BRCA	Breast	doi:10.1038/nature11412
OR2L2	26246	BRCA	Breast	doi:10.1038/nature11412
OR4A16	81327	MEL	Melanoma	doi:10.1038/nature12912
OR52N1	79473	MEL	Melanoma	doi:10.1038/nature12912
OR6A2	8590	BRCA	Breast	doi:10.1038/nature11412
OTUD7A	161725	HNSC	Head_and_neck	doi:10.1126/science.1208130
PAIP1	10605	BLCA	Bladder	doi:10.1038/nature12965
PARD6B	84612	GBM	Glioblastoma_multiforme	doi:10.1016/j.cell.2013.09.034
PBRM1	55193	KIRC	Kidney_clear_cell	doi:10.1038/nature12222
PCBP1	5093	CRC	Colorectal	doi:10.1038/nature12912
PDGFRA	5156	GBM	Glioblastoma_multiforme	doi:10.1016/j.cell.2013.09.034
PHF6	84295	LAML	Acute_myeloid_leukemia	doi:10.1056/NEJMoa1301689
PIK3CA	5290	BLCA	Bladder	doi:10.1038/nature12965
PIK3CA	5290	BRCA	Breast	doi:10.1038/nature11412
PIK3CA	5290	COAD	Colorectal	doi:10.1038/nature11252
PIK3CA	5290	CRC	Colorectal	doi:10.1038/nature12912
PIK3CA	5290	ESO	Esophageal_adenocarcinoma	doi:10.1038/nature12912
PIK3CA	5290	GBM	Glioblastoma_multiforme	doi:10.1016/j.cell.2013.09.034
PIK3CA	5290	HNSC	Head_and_neck	doi:10.1126/science.1208130
PIK3CA	5290	KIRC	Kidney_clear_cell	doi:10.1038/nature12222
PIK3CA	5290	LUAD	Lung_adenocarcinoma	doi:10.1016/j.cell.2012.08.024
PIK3CA	5290	LUSC	Lung_squamous_cell_carcinoma	doi:10.1038/nature11404
PIK3CA	5290	UCEC	Endometrial	doi:10.1038/nature12113
PIK3R1	5295	BRCA	Breast	doi:10.1038/nature11412
PIK3R1	5295	GBM	Glioblastoma_multiforme	doi:10.1016/j.cell.2013.09.034
PIK3R1	5295	UCEC	Endometrial	doi:10.1038/nature12113
PIWIL1	9271	BRCA	Breast	doi:10.1038/nature11412
PLCH2	9651	GBM	Glioblastoma_multiforme	doi:10.1016/j.cell.2013.09.034
PNN	5411	UCEC	Endometrial	doi:10.1038/nature12113
PNPLA3	80339	BRCA	Breast	doi:10.1038/nature11412
PODNL1	79883	GBM	Glioblastoma_multiforme	doi:10.1016/j.cell.2013.09.034
POLE	5426	UCEC	Endometrial	doi:10.1038/nature12113
POU2AF1	5450	DLBCL	Diffuse_large_B-cell_lymphoma	doi:10.1038/nature12912
POU2F2	5452	DLBCL	Diffuse_large_B-cell_lymphoma	doi:10.1038/nature12912
PPM1D	8493	UCEC	Endometrial	doi:10.1038/nature12113
PPP2R1A	5518	UCEC	Endometrial	doi:10.1038/nature12113
PPP6C	5537	MEL	Melanoma	doi:10.1038/nature12912
PRDM1	639	MM	Multiple_myeloma	doi:10.1038/nature12912
PTEN	5728	BRCA	Breast	doi:10.1038/nature11412
PTEN	5728	GBM	Glioblastoma_multiforme	doi:10.1016/j.cell.2013.09.034
PTEN	5728	HNSC	Head_and_neck	doi:10.1126/science.1208130
PTEN	5728	KIRC	Kidney_clear_cell	doi:10.1038/nature12222
PTEN	5728	LUSC	Lung_squamous_cell_carcinoma	doi:10.1038/nature11404
PTEN	5728	MEL	Melanoma	doi:10.1038/nature12912
PTEN	5728	UCEC	Endometrial	doi:10.1038/nature12113
PTPN11	5781	LAML	Acute_myeloid_leukemia	doi:10.1056/NEJMoa1301689
PTPN12	5782	COAD	Colorectal	doi:10.1038/nature11252
PTPN22	26191	BRCA	Breast	doi:10.1038/nature11412
PTPRD	5789	BRCA	Breast	doi:10.1038/nature11412
QKI	9444	GBM	Glioblastoma_multiforme	doi:10.1016/j.cell.2013.09.034
RAB40A	142684	BRCA	Breast	doi:10.1038/nature11412
RAC1	5879	HNSC	Head_and_neck	doi:10.1126/science.1208130
RAC1	5879	MEL	Melanoma	doi:10.1038/nature12912
RAD21	5885	LAML	Acute_myeloid_leukemia	doi:10.1056/NEJMoa1301689
RASA1	5921	HNSC	Head_and_neck	doi:10.1126/science.1208130
RB1	5925	BLCA	Bladder	doi:10.1038/nature12965
RB1	5925	BRCA	Breast	doi:10.1038/nature11412
RB1	5925	GBM	Glioblastoma_multiforme	doi:10.1016/j.cell.2013.09.034
RB1	5925	LUAD	Lung_adenocarcinoma	doi:10.1016/j.cell.2012.08.024
RB1	5925	LUSC	Lung_squamous_cell_carcinoma	doi:10.1038/nature11404
RB1	5925	OV	Ovarian	doi:10.1038/nature10166
RBM10	8241	LUAD	Lung_adenocarcinoma	doi:10.1016/j.cell.2012.08.024
RBMX	27316	UCEC	Endometrial	doi:10.1038/nature12113
RELN	5649	LUAD	Lung_adenocarcinoma	doi:10.1016/j.cell.2012.08.024
RFX6	222546	GBM	Glioblastoma_multiforme	doi:10.1016/j.cell.2013.09.034
RHEB	6009	KIRC	Kidney_clear_cell	doi:10.1038/nature12222
RHOA	387	BLCA	Bladder	doi:10.1038/nature12965
RHOA	387	HNSC	Head_and_neck	doi:10.1126/science.1208130
RHOA	387	Gastric	Gastric	doi:10.1038/ng.2983
RHOB	388	BLCA	Bladder	doi:10.1038/nature12965
RIMS2	9699	Gastric	Gastric	doi:10.1038/ng.2983
RIT1	6016	LUAD	Lung_adenocarcinoma	doi:10.1016/j.cell.2012.08.024
RNF43	54894	Gastric	Gastric	doi:10.1038/ng.2983
RPGR	6103	BRCA	Breast	doi:10.1038/nature11412
RPL22	6146	UCEC	Endometrial	doi:10.1038/nature12113
RPL5	6125	GBM	Glioblastoma_multiforme	doi:10.1016/j.cell.2013.09.034
RPS15	6209	CLL	Chronic_lymphocytic_leukemia	doi:10.1038/nature12912
RPS2	6187	CLL	Chronic_lymphocytic_leukemia	doi:10.1038/nature12912
RRN3P2	653390	UCEC	Endometrial	doi:10.1038/nature12113
RSBN1L	222194	UCEC	Endometrial	doi:10.1038/nature12113
RUNX1	861	BRCA	Breast	doi:10.1038/nature11412
RUNX1	861	LAML	Acute_myeloid_leukemia	doi:10.1056/NEJMoa1301689
RXRA	6256	BLCA	Bladder	doi:10.1038/nature12965
RYR2	6262	BRCA	Breast	doi:10.1038/nature11412
SACS	26278	UCEC	Endometrial	doi:10.1038/nature12113
SCN9A	6335	GBM	Glioblastoma_multiforme	doi:10.1016/j.cell.2013.09.034
SELP	6403	UCEC	Endometrial	doi:10.1038/nature12113
SEMA3C	10512	GBM	Glioblastoma_multiforme	doi:10.1016/j.cell.2013.09.034
SEMA3E	9723	GBM	Glioblastoma_multiforme	doi:10.1016/j.cell.2013.09.034
SEMG1	6406	GBM	Glioblastoma_multiforme	doi:10.1016/j.cell.2013.09.034
SEPT7P2	641977	BRCA	Breast	doi:10.1038/nature11412
SETD2	29072	GBM	Glioblastoma_multiforme	doi:10.1016/j.cell.2013.09.034
SETD2	29072	KIRC	Kidney_clear_cell	doi:10.1038/nature12222
SF3B1	23451	BRCA	Breast	doi:10.1038/nature11412
SF3B1	23451	CLL	Chronic_lymphocytic_leukemia	doi:10.1038/nature12912
SGK1	6446	UCEC	Endometrial	doi:10.1038/nature12113
SIGLEC8	27181	GBM	Glioblastoma_multiforme	doi:10.1016/j.cell.2013.09.034
SIN3A	25942	UCEC	Endometrial	doi:10.1038/nature12113
SIRT4	23409	CRC	Colorectal	doi:10.1038/nature12912
SLC1A3	6507	UCEC	Endometrial	doi:10.1038/nature12113
SLC26A3	1811	GBM	Glioblastoma_multiforme	doi:10.1016/j.cell.2013.09.034
SLC44A3	126969	UCEC	Endometrial	doi:10.1038/nature12113
SLC4A5	57835	LUAD	Lung_adenocarcinoma	doi:10.1016/j.cell.2012.08.024
SLC9A9	285195	COAD	Colorectal	doi:10.1038/nature11252
SLC9C2	284525	UCEC	Endometrial	doi:10.1038/nature12113
SLITRK6	84189	KIRC	Kidney_clear_cell	doi:10.1038/nature12222
SMAD2	4087	COAD	Colorectal	doi:10.1038/nature11252
SMAD2	4087	CRC	Colorectal	doi:10.1038/nature12912
SMAD4	4089	COAD	Colorectal	doi:10.1038/nature11252
SMAD4	4089	CRC	Colorectal	doi:10.1038/nature12912
SMAD4	4089	Gastric	Gastric	doi:10.1038/ng.2983
SMARCA4	6597	ESO	Esophageal_adenocarcinoma	doi:10.1038/nature12912
SMARCA4	6597	LUAD	Lung_adenocarcinoma	doi:10.1016/j.cell.2012.08.024
SMARCB1	6598	ESO	Esophageal_adenocarcinoma	doi:10.1038/nature12912
SMC1A	8243	LAML	Acute_myeloid_leukemia	doi:10.1056/NEJMoa1301689
SMC3	9126	LAML	Acute_myeloid_leukemia	doi:10.1056/NEJMoa1301689
SNX25	83891	BLCA	Bladder	doi:10.1038/nature12965
SOS1	6654	UCEC	Endometrial	doi:10.1038/nature12113
SOX17	64321	UCEC	Endometrial	doi:10.1038/nature12113
SOX9	6662	COAD	Colorectal	doi:10.1038/nature11252
SPEN	23013	BRCA	Breast	doi:10.1038/nature11412
SPOP	8405	PRAD	Prostate	doi:10.1038/nature12912
SPOP	8405	UCEC	Endometrial	doi:10.1038/nature12113
SPTA1	6708	GBM	Glioblastoma_multiforme	doi:10.1016/j.cell.2013.09.034
SPTA1	6708	UCEC	Endometrial	doi:10.1038/nature12113
SPTA1	6708	Gastric	Gastric	doi:10.1038/ng.2983
SRPR	6734	BRCA	Breast	doi:10.1038/nature11412
STAG2	10735	BLCA	Bladder	doi:10.1038/nature12965
STAG2	10735	BRCA	Breast	doi:10.1038/nature11412
STAG2	10735	GBM	Glioblastoma_multiforme	doi:10.1016/j.cell.2013.09.034
STAG2	10735	LAML	Acute_myeloid_leukemia	doi:10.1056/NEJMoa1301689
STK11	6794	LUAD	Lung_adenocarcinoma	doi:10.1016/j.cell.2012.08.024
STK19	8859	MEL	Melanoma	doi:10.1038/nature12912
STX2	2054	LUAD	Lung_adenocarcinoma	doi:10.1016/j.cell.2012.08.024
SULT1B1	27284	GBM	Glioblastoma_multiforme	doi:10.1016/j.cell.2013.09.034
TAF1	6872	UCEC	Endometrial	doi:10.1038/nature12113
TAP1	6890	UCEC	Endometrial	doi:10.1038/nature12113
TBC1D12	23232	BLCA	Bladder	doi:10.1038/nature12965
TBL1XR1	79718	BRCA	Breast	doi:10.1038/nature11412
TBL1XR1	79718	UCEC	Endometrial	doi:10.1038/nature12113
TBX3	6926	BRCA	Breast	doi:10.1038/nature11412
TCEB1	6921	KIRC	Kidney_clear_cell	doi:10.1038/nature12222
TCERG1	10915	COAD	Colorectal	doi:10.1038/nature11252
TCF7L2	6934	COAD	Colorectal	doi:10.1038/nature11252
TCF7L2	6934	CRC	Colorectal	doi:10.1038/nature12912
TCHH	7062	GBM	Glioblastoma_multiforme	doi:10.1016/j.cell.2013.09.034
TCP11L2	255394	UCEC	Endometrial	doi:10.1038/nature12113
TET2	54790	LAML	Acute_myeloid_leukemia	doi:10.1056/NEJMoa1301689
TGFBR2	7048	HNSC	Head_and_neck	doi:10.1126/science.1208130
TGFBR2	7048	Gastric	Gastric	doi:10.1038/ng.2983
THBS1	7057	Gastric	Gastric	doi:10.1038/ng.2983
THSD7B	80731	Gastric	Gastric	doi:10.1038/ng.2983
TLR4	7099	BRCA	Breast	doi:10.1038/nature11412
TMEM147	10430	GBM	Glioblastoma_multiforme	doi:10.1016/j.cell.2013.09.034
TNF	7124	DLBCL	Diffuse_large_B-cell_lymphoma	doi:10.1038/nature12912
TNFAIP6	7130	UCEC	Endometrial	doi:10.1038/nature12113
TNFRSF14	8764	DLBCL	Diffuse_large_B-cell_lymphoma	doi:10.1038/nature12912
TP53	7157	BLCA	Bladder	doi:10.1038/nature12965
TP53	7157	BRCA	Breast	doi:10.1038/nature11412
TP53	7157	CLL	Chronic_lymphocytic_leukemia	doi:10.1038/nature12912
TP53	7157	COAD	Colorectal	doi:10.1038/nature11252
TP53	7157	CRC	Colorectal	doi:10.1038/nature12912
TP53	7157	DLBCL	Diffuse_large_B-cell_lymphoma	doi:10.1038/nature12912
TP53	7157	ESO	Esophageal_adenocarcinoma	doi:10.1038/nature12912
TP53	7157	GBM	Glioblastoma_multiforme	doi:10.1016/j.cell.2013.09.034
TP53	7157	HNSC	Head_and_neck	doi:10.1126/science.1208130
TP53	7157	KIRC	Kidney_clear_cell	doi:10.1038/nature12222
TP53	7157	LAML	Acute_myeloid_leukemia	doi:10.1056/NEJMoa1301689
TP53	7157	LUAD	Lung_adenocarcinoma	doi:10.1016/j.cell.2012.08.024
TP53	7157	LUSC	Lung_squamous_cell_carcinoma	doi:10.1038/nature11404
TP53	7157	MEL	Melanoma	doi:10.1038/nature12912
TP53	7157	MM	Multiple_myeloma	doi:10.1038/nature12912
TP53	7157	OV	Ovarian	doi:10.1038/nature10166
TP53	7157	PRAD	Prostate	doi:10.1038/nature12912
TP53	7157	UCEC	Endometrial	doi:10.1038/nature12113
TP53	7157	Gastric	Gastric	doi:10.1038/ng.2983
TPRX1	284355	BRCA	Breast	doi:10.1038/nature11412
TPTE2	93492	GBM	Glioblastoma_multiforme	doi:10.1016/j.cell.2013.09.034
TPX2	22974	UCEC	Endometrial	doi:10.1038/nature12113
TRAF3	7187	MM	Multiple_myeloma	doi:10.1038/nature12912
TRIM23	373	CRC	Colorectal	doi:10.1038/nature12912
TRIM51BP	399937	GBM	Glioblastoma_multiforme	doi:10.1016/j.cell.2013.09.034
TRIM53AP	642569	BRCA	Breast	doi:10.1038/nature11412
TRIM6-TRIM34	445372	BRCA	Breast	doi:10.1038/nature11412
TRPV6	55503	GBM	Glioblastoma_multiforme	doi:10.1016/j.cell.2013.09.034
TSC1	7248	BLCA	Bladder	doi:10.1038/nature12965
TTLL9	164395	UCEC	Endometrial	doi:10.1038/nature12113
TTN	7273	COAD	Colorectal	doi:10.1038/nature11252
TXNDC8	255220	UCEC	Endometrial	doi:10.1038/nature12113
TXNIP	10628	BLCA	Bladder	doi:10.1038/nature12965
TXNIP	10628	KIRC	Kidney_clear_cell	doi:10.1038/nature12222
U2AF1	7307	LAML	Acute_myeloid_leukemia	doi:10.1056/NEJMoa1301689
U2AF1	7307	LUAD	Lung_adenocarcinoma	doi:10.1016/j.cell.2012.08.024
UGT2A3	79799	GBM	Glioblastoma_multiforme	doi:10.1016/j.cell.2013.09.034
USH2A	7399	BRCA	Breast	doi:10.1038/nature11412
USH2A	7399	UCEC	Endometrial	doi:10.1038/nature12113
USP9X	8239	UCEC	Endometrial	doi:10.1038/nature12113
VHL	7428	KIRC	Kidney_clear_cell	doi:10.1038/nature12222
WASF3	10810	MEL	Melanoma	doi:10.1038/nature12912
WBSCR17	64409	COAD	Colorectal	doi:10.1038/nature11252
WNT2	7472	GBM	Glioblastoma_multiforme	doi:10.1016/j.cell.2013.09.034
WNT7A	7476	BRCA	Breast	doi:10.1038/nature11412
WT1	7490	LAML	Acute_myeloid_leukemia	doi:10.1056/NEJMoa1301689
XIRP2	129446	MEL	Melanoma	doi:10.1038/nature12912
XPO1	7514	CLL	Chronic_lymphocytic_leukemia	doi:10.1038/nature12912
ZFHX3	463	UCEC	Endometrial	doi:10.1038/nature12113
ZFHX4	79776	LUAD	Lung_adenocarcinoma	doi:10.1016/j.cell.2012.08.024
ZFP36L1	677	BLCA	Bladder	doi:10.1038/nature12965
ZFP36L1	677	BRCA	Breast	doi:10.1038/nature11412
ZFR2	23217	BLCA	Bladder	doi:10.1038/nature12965
ZIC4	84107	Gastric	Gastric	doi:10.1038/ng.2983
ZNF471	57573	UCEC	Endometrial	doi:10.1038/nature12113
ZNF620	253639	UCEC	Endometrial	doi:10.1038/nature12113
ZNF750	79755	HNSC	Head_and_neck	doi:10.1126/science.1208130
ZNF770	54989	UCEC	Endometrial	doi:10.1038/nature12113
ZNF844	284391	GBM	Glioblastoma_multiforme	doi:10.1016/j.cell.2013.09.034
ZNF99	7652	GBM	Glioblastoma_multiforme	doi:10.1016/j.cell.2013.09.034
ZRANB3	84083	UCEC	Endometrial	doi:10.1038/nature12113
