# Supplementary material for: Systems Biology-Based Investigation of Cellular Antiviral Drug Targets Identified by Gene-Trap Insertional Mutagenesis
Source: PLoS Comput Biol. 2016 Sep 15;12(9):e1005074. doi: 10.1371/journal.pcbi.1005074 (PMC5025164; doi:10.1371/journal.pcbi.1005074)
Supplement: S8 Table — (XLSX) [file pcbi.1005074.s009.xlsx]

## Sheet: All predicted candidates
Drug ID	Associated Pathogen	Predicted drugs for anti-HIV-1 indications	p-value (Fisher'e exact test)	Adjusted p-value	Tested drug concentration in CMap database
2439	Rhinovirus-16	menadione	2.2e-06	0.0001342	2.32e-05
7503	HSV-2	trichostatin A	2.44e-06	0.00014884	1e-06
1769	HSV-2	ipratropium bromide	2.7e-06	0.0001647	9.8e-06
1885	Influenza-A	troleandomycin	3.01e-06	0.00018361	5e-06
3184	Tularensis	mepyramine	3.04e-06	0.00018544	1e-05
5354	HSV-2	mitoxantrone	6.05e-06	0.00036905	7.8e-06
124	HSV-2	mesalazine	7.26e-06	0.00044286	0.0001
4781	HSV-2	benperidol	7.28e-06	0.00044408	1.04e-05
7078	Influenza-A	alsterpaullone	1.34e-05	0.0008174	1e-05
1783	HSV-2	epivincamine	2.14e-05	0.0013054	1.12e-05
7085	HSV-2	GW-8510	2.29e-05	0.0013969	1e-05
1749	Ebola	ajmaline	3.39e-05	0.0020679	1.22e-05
941	Rhinovirus-16	rottlerin	4.02e-05	0.0024522	1e-05
2915	HSV-2	etamsylate	4.54e-05	0.0027694	1.52e-05
6328	Influenza-A	tribenoside	4.69e-05	0.0028609	8.4e-06
2321	HIV-1	camptothecin	6.09e-05	0.0037149	1.14e-05
4162	Rhinovirus-16	tobramycin	6.47e-05	0.0039467	8.6e-06
6717	Rhinovirus-16	promethazine	6.85e-05	0.0041785	1.24e-05
3014	Borna-disease-virus	carbenoxolone	7.18e-05	0.0043798	6.6e-06
6578	HSV-2	PHA-00665752	7.21e-05	0.0043981	1e-05
1005	Tularensis	tanespimycin	8.37e-05	0.0051057	1e-06
4475	HIV-1	sertaconazole	9.39e-05	0.0057279	8e-06
2530	T.cruzi	terazosin	9.69e-05	0.0059109	9.4e-06
166	Rhinovirus-2	rofecoxib	9.93e-05	0.0060573	1e-05
4729	HSV-2	meclofenoxate	0.000102042	0.00622456	1.36e-05
5222	Rhinovirus-16	tanespimycin	0.000103322	0.00630264	1e-06
7190	Borna-disease-virus	cinchonidine	0.000119131	0.00726699	1.36e-05
5354	Rhinovirus-16	mitoxantrone	0.000121302	0.00727812	7.8e-06
2505	Ebola	ricinine	0.000123851	0.00755491	2.44e-05
5515	EBV	bufexamac	0.000128022	0.00780934	1.8e-05
6793	HSV-2	nocodazole	0.000134616	0.00821158	1.32e-05
2915	RSV	etamsylate	0.000139142	0.00834852	1.52e-05
6253	HSV-2	ellipticine	0.000143841	0.0087743	1.62e-05
5362	HSV-2	nilutamide	0.000147349	0.00898829	1.26e-05
1171	HSV-2	thioridazine	0.000149957	0.00914738	1e-05
6811	Influenza-A	sertaconazole	0.000150085	0.00915518	8e-06
3824	Rhinovirus-16	PHA-00745360	0.000165207	0.0100776	1e-05
2571	C.perfringens-epsilon-toxin	lithocholic acid	0.000170737	0.010415	1.06e-05
942	Borna-disease-virus	prazosin	0.000172048	0.0104949	1e-05
7051	HIV-1	alsterpaullone	0.000174467	0.0106425	1e-05
6221	HSV-2	calycanthine	0.000179753	0.0109649	1.16e-05
3291	Influenza-A	doxorubicin	0.000180037	0.0109823	6.8e-06
5022	Rhinovirus-16	maprotiline	0.000181834	0.0110919	1.28e-05
6912	HSV-2	PF-00562151-00	0.000208325	0.0127078	1e-05
3808	HIV-1	lycorine	0.000232709	0.0141952	1.24e-05
5569	Influenza-A	valproic acid	0.000237544	0.0144902	0.001
3220	Ebola	clopamide	0.000256447	0.0156433	1.16e-05
3780	HCV	proglumide	0.000265141	0.0161736	1.2e-05
5925	Rhinovirus-16	pioglitazone	0.000265618	0.0162027	1e-05
5663	T.cruzi	procainamide	0.000267042	0.0162896	1.48e-05
5356	Rhinovirus-16	fluoxetine	0.000269956	0.0164673	1.16e-05
5856	Influenza-A	milrinone	0.00028344	0.0172898	1.9e-05
4732	Rhinovirus-16	cloperastine	0.000288736	0.0176129	1.1e-05
5105	Tularensis	parthenolide	0.000294572	0.0179689	1.62e-05
2927	HIV-1	sanguinarine	0.00031902	0.0194602	1.2e-05
7241	EBV	mesalazine	0.000319077	0.0194637	2.62e-05
6173	HSV-2	valproic acid	0.000319763	0.0195055	0.0002
4454	Rhinovirus-16	thioridazine	0.000324483	0.0197935	1e-05
4801	HSV-2	digitoxigenin	0.000350972	0.0214093	1.06e-05
5671	HSV-2	doxorubicin	0.000363679	0.0221844	6.8e-06
6294	Borna-disease-virus	aminohippuric acid	0.000393566	0.0240075	2.06e-05
1520	HSV-2	azacyclonol	0.000398777	0.0243254	1.5e-05
2296	HSV-2	sulfamethoxazole	0.000428888	0.0261622	1.58e-05
4995	WNV	ketanserin	0.000433687	0.0264549	7e-06
6972	C.difficile-toxin	trichostatin A	0.000436124	0.0266036	1e-07
2808	EBV	solanine	0.000438091	0.0267236	4.6e-06
1103	Rhinovirus-2	demecolcine	0.000459833	0.0280498	1.17e-05
6482	Borna-disease-virus	benserazide	0.000475808	0.0290243	1.36e-05
7445	Ebola	piroxicam	0.000476497	0.0290663	1.2e-05
7527	Tularensis	CP-645525-01	0.000491877	0.0300045	1e-05
1835	Rhinovirus-16	trichostatin A	0.000494161	0.0301438	1e-07
7351	Influenza-A	tocainide	0.000495021	0.0301963	1.74e-05
4845	WNV	primaquine	0.000507839	0.0309782	8.8e-06
6297	RSV	nicardipine	0.000510287	0.0311275	7.8e-06
6893	WNV	pioglitazone	0.000516445	0.0315031	1e-05
338	WNV	azathioprine	0.000522101	0.0318482	0.0001
7045	Reovirus	lomustine	0.000522301	0.0318604	0.0001
2848	HCV	methoxamine	0.000531883	0.0324449	1.62e-05
6210	RSV	disulfiram	0.000537581	0.0327924	1.34e-05
5070	WNV	prenylamine	0.000546646	0.0333454	9.6e-06
4140	Influenza-A	benzathine benzylpenicillin	0.000550498	0.0335804	4.2e-06
1172	Rhinovirus-16	15-delta prostaglandin J2	0.000551467	0.0336395	1e-05
6896	C.perfringens-epsilon-toxin	scriptaid	0.000561555	0.0342549	1e-05
3131	Echovirus-1	scopoletin	0.000575486	0.0351046	2.08e-05
3279	Tularensis	primaquine	0.000575676	0.0351162	8.8e-06
2061	Rhinovirus-16	acetylsalicylsalicylic acid	0.000587811	0.0358565	1.34e-05
6446	Vaccinia-virus	butyl hydroxybenzoate	0.00060086	0.0366525	2.06e-05
5405	Influenza-A	nitrendipine	0.000604503	0.0368747	1.1e-05
4221	HCV	tolnaftate	0.000611231	0.0372851	1.3e-05
6905	HSV-2	orlistat	0.000615715	0.0375586	1e-05
5271	HIV-1	testosterone	0.000619918	0.037815	1.16e-05
2321	Influenza-A	camptothecin	0.000632668	0.0379601	1.14e-05
2891	RSV	scoulerine	0.000626139	0.0381945	1.22e-05
2756	HCV	diclofenac	0.000641389	0.0391247	1.26e-05
4289	Rhinovirus-16	0179445-0000	0.000652013	0.0397728	1e-05
966	C.perfringens-epsilon-toxin	tretinoin	0.000656983	0.040076	1e-06
2861	HSV-2	piracetam	0.000661202	0.0403333	2.82e-05
6477	EBV	promethazine	0.000669935	0.040866	1.24e-05
7498	HSV-2	irinotecan	0.000674451	0.0411415	0.0001
7100	HSV-2	thapsigargin	0.000686053	0.0418492	1e-07
2531	HCV	butamben	0.000692851	0.0422639	2.06e-05
3426	HSV-2	cefazolin	0.000715113	0.0436219	8.4e-06
3144	HSV-2	deptropine	0.000715553	0.0436487	7.6e-06
6301	Polio	clopamide	0.000723843	0.0441544	1.16e-05
455	Rhinovirus-16	prochlorperazine	0.000735453	0.0448626	1e-05
4089	HIV-1	amylocaine	0.000740992	0.0452005	1.48e-05
5761	Marburg	cefepime	0.000748115	0.045635	7.4e-06
6049	HIV-1	2,6-dimethylpiperidine	0.000752301	0.0458904	2.68e-05
2449	HCV	serotonin	0.000755661	0.0460953	1.88e-05
7417	HCV	homochlorcyclizine	0.000755822	0.0461051	1.04e-05
1772	HBV	hydrocotarnine	0.000759581	0.0463344	1.32e-05
7382	H.pylori	Prestwick-685	0.000766193	0.0467378	1.06e-05
2036	Tularensis	baclofen	0.000774812	0.0472635	1.88e-05
6886	Influenza-A	trichostatin A	0.000789653	0.0473792	1e-06
6906	WNV	STOCK1N-28457	0.000778181	0.047469	2e-05
5493	HCV	chlorpromazine	0.000778251	0.0474733	1.12e-05
2491	C.parvum	colistin	0.000778865	0.0475108	3e-06
5284	Polio	hydrocortisone	0.00078104	0.0476434	1.1e-05
6660	Influenza-A	hydroxyzine	0.000790448	0.0482173	9e-06
579	HSV-2	fisetin	0.000796455	0.0485838	5e-05
1923	HCV	apomorphine	0.000798939	0.0487353	6.4e-06
1132	Rhinovirus-16	BW-B70C	0.000809096	0.0493549	3.16e-05
1604	dengue-2	clorgiline	0.000820008	0.0500205	1.3e-05
1923	HSV-2	apomorphine	0.000857361	0.0514417	6.4e-06
3016	Hendra-virus	Prestwick-857	0.000859697	0.0524415	1.22e-05
3016	Nipah-virus	Prestwick-857	0.000859697	0.0524415	1.22e-05
2038	Ebola	danazol	0.000869437	0.0530357	1.18e-05
5439	EBV	pyrvinium	0.000878691	0.0536002	3.4e-06
7051	HSV-2	alsterpaullone	0.000911539	0.0537808	1e-05
4493	Rhinovirus-16	securinine	0.000894725	0.0545782	1.84e-05
3800	C.parvum	ciclacillin	0.000900938	0.0549572	1.18e-05
5936	HSV-2	H-7	0.000903178	0.0550939	0.0001
7408	HIV-1	triprolidine	0.000906921	0.0553222	1.28e-05
1783	EBV	epivincamine	0.000931214	0.0558728	1.12e-05
6763	C.perfringens-epsilon-toxin	nilutamide	0.000920983	0.05618	1.26e-05
3534	Rhinovirus-16	penbutolol	0.000929066	0.056673	5.8e-06
1103	Rhinovirus-16	demecolcine	0.000946719	0.0568031	1.17e-05
5338	Influenza-A	oxantel	0.000937413	0.0571822	6.6e-06
2929	HIV-1	fursultiamine	0.0009652	0.0588772	9.2e-06
168	Rhinovirus-2	sulindac	0.000966877	0.0589795	0.0001
1334	Rhinovirus-16	myricetin	0.000978894	0.0597125	1.26e-05
2447	Rhinovirus-16	ceforanide	0.000978894	0.0597125	7.6e-06
1509	Influenza-A	verapamil	0.00098735	0.0602283	8.2e-06
3034	C.perfringens-epsilon-toxin	capsaicin	0.00103896	0.0633763	1.3e-05
2026	RSV	midecamycin	0.00104024	0.0634549	5e-06
3929	Polio	metamizole sodium	0.00104221	0.0635749	1.2e-05
1548	Hendra-virus	tretinoin	0.00106285	0.0648338	1.34e-05
1548	Nipah-virus	tretinoin	0.00106285	0.0648338	1.34e-05
3679	Hendra-virus	fludroxycortide	0.00106285	0.0648338	9.2e-06
3679	Nipah-virus	fludroxycortide	0.00106285	0.0648338	9.2e-06
205	Reovirus	rofecoxib	0.00106859	0.065184	1e-05
2533	Hendra-virus	naproxen	0.00108976	0.0664752	1.58e-05
2533	Nipah-virus	naproxen	0.00108976	0.0664752	1.58e-05
1931	HSV-2	amoxapine	0.0011	0.0670998	1.28e-05
6916	HIV-1	trichostatin A	0.00112535	0.0686463	1e-06
3516	SARS	rimexolone	0.00114458	0.0698194	1.08e-05
6427	Rhinovirus-16	STOCK1N-35215	0.0011601	0.0707663	1e-05
3291	HIV-1	doxorubicin	0.00118782	0.0712692	6.8e-06
5743	Rhinovirus-16	cicloheximide	0.00116978	0.0713565	1.42e-05
1114	RSV	tyrphostin AG-825	0.00118854	0.0725011	2.52e-05
2369	Polio	dantrolene	0.00119358	0.0728083	1.18e-05
383	HIV-1	cobalt chloride	0.00121136	0.0738929	0.0001
6056	SARS	benzamil	0.00122934	0.0749897	1.12e-05
1997	HPV-16	4-hydroxyphenazone	0.00123001	0.0750307	1.96e-05
6078	HCV	trioxysalen	0.00123191	0.0751463	1.76e-05
6451	HSV-2	phenoxybenzamine	0.00123823	0.0755323	1.18e-05
7052	WNV	0316684-0000	0.00124087	0.0756928	1e-05
5026	Tularensis	ouabain	0.00124364	0.0758622	5.4e-06
2631	Tularensis	dequalinium chloride	0.0012477	0.0761094	7.6e-06
3416	HSV-2	eucatropine	0.00124835	0.0761494	1.22e-05
2747	EBV	papaverine	0.00124841	0.0761533	1.06e-05
5094	HSV-2	oxolinic acid	0.00124911	0.0761955	1.54e-05
4360	Influenza-A	phenelzine	0.00125641	0.0766409	1.7e-05
6867	HIV-1	fulvestrant	0.00127753	0.0779296	1e-06
3479	EBV	doxycycline	0.00130932	0.0798684	8.4e-06
6477	HIV-1	promethazine	0.00134809	0.0808857	1.24e-05
2161	HSV-2	picrotoxinin	0.0013297	0.0811115	1.36e-05
3480	HSV-2	raloxifene	0.00133776	0.0816035	7.8e-06
4840	Influenza-A	buflomedil	0.00134917	0.0822994	1.16e-05
3541	HIV-1	viomycin	0.00135041	0.0823748	5.2e-06
7513	HCV	IC-86621	0.00135685	0.082768	1e-06
2753	EBV	syrosingopine	0.00138352	0.0843948	6e-06
1598	Reovirus	colchicine	0.00139261	0.084949	1e-05
6175	Marburg	LY-294002	0.00139587	0.0851478	1e-07
5868	SARS	cefmetazole	0.00140794	0.0858843	8.2e-06
3408	Tularensis	cloperastine	0.00142976	0.0872152	1.1e-05
1652	Rhinovirus-16	LY-294002	0.00144437	0.0881065	1e-05
2279	Influenza-A	chlorphenesin	0.00145515	0.0887641	1.62e-05
6263	Influenza-A	hydroquinine	0.00145515	0.0887641	9.4e-06
2363	Hendra-virus	proglumide	0.00147016	0.0896799	1.2e-05
2363	Nipah-virus	proglumide	0.00147016	0.0896799	1.2e-05
4996	Vaccinia-virus	amoxapine	0.00147655	0.0900696	1.28e-05
3198	Tularensis	chlortalidone	0.00149526	0.0912107	1.18e-05
1233	S.aureus-toxin	rosiglitazone	0.00150255	0.0916557	1e-05
3706	Borna-disease-virus	demeclocycline	0.00150665	0.0919057	8e-06
2020	Ebola	azacyclonol	0.00150862	0.0920256	1.5e-05
5666	WNV	naringin	0.00151752	0.0925687	6.6e-06
4371	Influenza-A	guaifenesin	0.00152344	0.0929299	2.02e-05
1402	Ebola	ampyrone	0.00152618	0.0930968	1.96e-05
1858	EBV	metformin	0.00152765	0.0931869	2.42e-05
5244	Rhinovirus-16	meclozine	0.0015394	0.0939032	8.6e-06
6438	Rhinovirus-16	5707885	0.00155505	0.0948583	5e-05
5344	HSV-2	metergoline	0.00155764	0.0950158	1e-05
7080	Influenza-A	GW-8510	0.00157388	0.0960067	1e-05
2303	T.cruzi	nitrofurantoin	0.00158619	0.0967575	1.68e-05
3098	Rhinovirus-16	prazosin	0.00159915	0.0975483	9.6e-06
7045	Dengue-2	lomustine	0.00163831	0.0982984	0.0001
6224	HBV	amodiaquine	0.00162352	0.0990345	8.6e-06
7474	Tularensis	fenofibrate	0.00162756	0.0992812	1.1e-05
2564	C.perfringens-epsilon-toxin	cefazolin	0.00162937	0.0993913	8.4e-06
4653	EBV	phthalylsulfathiazole	0.0016324	0.0995763	1e-05
2805	HSV-2	harmaline	0.0016338	0.0996617	1.4e-05
6085	Reovirus	trichostatin A	0.00163825	0.0999331	1e-07
1388	HPV-16	pirenzepine	0.00164002	0.100041	9.4e-06
7035	HSV-2	disopyramide	0.00164098	0.1001	1.18e-05
2915	HBV	etamsylate	0.0016999	0.100294	1.52e-05
7188	HSV-2	fendiline	0.00165843	0.101164	1.14e-05
4847	HSV-2	succinylsulfathiazole	0.00165843	0.101164	1.12e-05
7085	WNV	GW-8510	0.00169103	0.101462	1e-05
2812	RSV	hydroxyachillin	0.0016747	0.102157	1.42e-05
7353	RSV	decamethonium bromide	0.00168251	0.102633	9.6e-06
3046	Reovirus	(+)-isoprenaline	0.00169159	0.103187	1.1e-05
1791	HIV-1	8-azaguanine	0.00169316	0.103283	2.62e-05
7430	EBV	niflumic acid	0.0017363	0.105914	1.42e-05
5826	HSV-2	strophanthidin	0.00174949	0.106719	9.8e-06
7015	Reovirus	moxisylyte	0.00175259	0.106908	1.26e-05
1069	Vaccinia-virus	15-delta prostaglandin J2	0.00175638	0.107139	1e-05
6563	RSV	PNU-0293363	0.00177464	0.108253	1e-05
6993	S.aureus-toxin	trichostatin A	0.0017766	0.108372	1e-06
6198	C.perfringens-epsilon-toxin	LY-294002	0.00179701	0.109618	1e-05
2651	Rhinovirus-16	suloctidil	0.00179982	0.109789	1.18e-05
5329	HSV-2	erythromycin	0.00180359	0.110019	5.4e-06
2812	Polio	hydroxyachillin	0.00183948	0.110369	1.42e-05
1673	Salmonella	sulfaphenazole	0.00181673	0.11082	1.28e-05
4221	HSV-2	tolnaftate	0.00184793	0.110876	1.3e-05
4713	HSV-2	0175029-0000	0.0018183	0.110916	1e-05
1167	HSV-2	tanespimycin	0.00183325	0.111828	1e-06
4977	Influenza-A	SR-95639A	0.00186941	0.114034	1e-05
3013	RSV	propantheline bromide	0.00187713	0.114505	9e-06
913	C.difficile-toxin	colforsin	0.00188052	0.114712	5e-05
2799	HCV	gramine	0.00188467	0.114965	2.3e-05
5316	Influenza-A	glycocholic acid	0.0018884	0.115192	8.6e-06
1041	EBV	haloperidol	0.00189154	0.115384	1e-05
5805	WNV	ifosfamide	0.00190046	0.115928	1.54e-05
889	Reovirus	5286656	0.00190566	0.116245	5e-05
2977	Reovirus	quinpirole	0.00192105	0.117184	1.56e-05
2886	Rhinovirus-16	prenylamine	0.00192227	0.117259	9.6e-06
4264	WNV	quercetin	0.0019346	0.11801	1.18e-05
5994	C.parvum	lymecycline	0.00193776	0.118203	6.6e-06
6201	Polio	sirolimus	0.00194213	0.11847	1e-07
4457	SARS	rosiglitazone	0.0019434	0.118547	1e-05
7295	Rhinovirus-16	homochlorcyclizine	0.00194615	0.118715	1.04e-05
4145	Influenza-A	corticosterone	0.00195755	0.119411	1.16e-05
5541	Rhinovirus-16	mometasone	0.0019576	0.119414	7.6e-06
5803	Rhinovirus-16	propidium iodide	0.0019576	0.119414	6e-06
3630	HIV-1	0179445-0000	0.00196116	0.119631	1e-05
4361	HSV-2	flutamide	0.00196531	0.119884	1.44e-05
2087	Influenza-A	midodrine	0.0019974	0.121841	1.38e-05
3262	HSV-2	N-acetylmuramic acid	0.00201682	0.123026	1.36e-05
4830	Rhinovirus-16	piperine	0.00202548	0.123554	1.4e-05
1790	BK-virus	folic acid	0.00205002	0.125051	9e-06
7422	Tularensis	nortriptyline	0.00206044	0.125687	1.34e-05
3423	Tularensis	dicoumarol	0.00206044	0.125687	1.18e-05
22	Measles	phenyl biguanide	0.00206262	0.12582	1e-05
4156	Polio	metrizamide	0.00207014	0.126279	5e-06
6098	Influenza-A	streptozocin	0.0020856	0.127222	1.5e-05
4413	HCV	vitexin	0.00209798	0.127977	9.2e-06
4810	HSV-2	salsolidin	0.00211385	0.128945	1.64e-05
6059	Borna-disease-virus	karakoline	0.00211929	0.129277	1.06e-05
2258	Salmonella	thalidomide	0.00212648	0.129716	1.54e-05
2915	Influenza-A	etamsylate	0.00223994	0.129917	1.52e-05
6079	H.pylori	cefalotin	0.0021664	0.13215	9.6e-06
3871	Tularensis	nialamide	0.00217638	0.132759	1.34e-05
2544	HSV-2	medrysone	0.00219988	0.134193	1.16e-05
2758	Influenza-A	ellipticine	0.00220516	0.134515	1.62e-05
7353	HSV-2	decamethonium bromide	0.00225226	0.135135	9.6e-06
1432	HIV-1	chlorphenesin	0.0022216	0.135518	1.62e-05
4624	Influenza-A	ketoconazole	0.00223019	0.136042	7.6e-06
7512	HSV-2	CP-863187	0.00223614	0.136405	1e-05
1182	Vaccinia-virus	estradiol	0.00224934	0.13721	1e-08
1468	Influenza-A	minaprine	0.00225422	0.137508	1.08e-05
2809	Influenza-A	glimepiride	0.00225422	0.137508	8.2e-06
5077	C.parvum	minocycline	0.00225708	0.137682	8e-06
2224	Rhinovirus-16	nomifensine	0.00227357	0.138688	1.12e-05
4296	C.difficile-toxin	gossypol	0.00228169	0.139183	7.8e-06
7481	Dengue-2	quinpirole	0.00228394	0.13932	1.56e-05
6874	C.perfringens-epsilon-toxin	trichostatin A	0.00228736	0.139529	1e-06
7169	Tularensis	benzydamine	0.00229539	0.140019	1.16e-05
5388	Rhinovirus-16	butoconazole	0.00231318	0.141104	8.4e-06
6563	HSV-2	PNU-0293363	0.00236032	0.141619	1e-05
3387	Polio	pentetic acid	0.00232511	0.141831	1.02e-05
6449	WNV	rolipram	0.00232968	0.14211	1.46e-05
5018	HSV-2	metixene	0.00233723	0.142571	1.16e-05
3608	HCV	cloperastine	0.00236186	0.144074	1.1e-05
2456	Rhinovirus-16	ciclopirox	0.0023699	0.144564	1.5e-05
3004	Rhinovirus-16	trimipramine	0.00237777	0.145044	9.8e-06
1850	Rhinovirus-16	acetazolamide	0.00237828	0.145075	1.8e-05
1295	Rhinovirus-16	testosterone	0.00237828	0.145075	1.16e-05
6268	RSV	methazolamide	0.00237901	0.14512	1.7e-05
312	HIV-1	staurosporine	0.00238209	0.145307	1e-06
2861	Salmonella	piracetam	0.00246012	0.147607	2.82e-05
2915	HIV-1	etamsylate	0.00260251	0.148343	1.52e-05
4603	C.difficile-toxin	practolol	0.00244606	0.149209	1.5e-05
5962	C.perfringens-epsilon-toxin	valinomycin	0.00245116	0.149521	1e-07
1553	Influenza-A	oxytetracycline	0.00245463	0.149732	8e-06
5783	C.perfringens-epsilon-toxin	cinoxacin	0.00245642	0.149842	1.52e-05
1906	Hendra-virus	hydrochlorothiazide	0.00245902	0.15	1.34e-05
1906	Nipah-virus	hydrochlorothiazide	0.00245902	0.15	1.34e-05
1983	BK-virus	dicycloverine	0.00246002	0.150062	1.16e-05
974	Metapneumovirus	ikarugamycin	0.00246002	0.150062	2e-06
974	Newcastle-disease-virus	ikarugamycin	0.00246002	0.150062	2e-06
1423	HPV-16	xylometazoline	0.00246002	0.150062	1.42e-05
5732	Borna-disease-virus	sulfametoxydiazine	0.00246931	0.150628	1.42e-05
3289	HIV-1	biotin	0.00250589	0.152859	1.64e-05
2367	C.perfringens-epsilon-toxin	vincamine	0.00250692	0.152922	1.12e-05
3064	C.parvum	xamoterol	0.0025297	0.154312	5e-06
6835	HSV-2	clobetasol	0.0025503	0.155568	8.6e-06
7330	Vaccinia-virus	gibberellic acid	0.00256365	0.156382	1.16e-05
3063	SARS	2-aminobenzenesulfonamide	0.00256496	0.156463	2.32e-05
2745	EBV	noscapine	0.0025764	0.157161	9.6e-06
839	C.difficile-toxin	5224221	0.00257663	0.157175	1.2e-05
564	HBV	15-delta prostaglandin J2	0.00258097	0.157439	1e-05
5437	C.parvum	propafenone	0.00260024	0.158614	1.06e-05
7269	Influenza-A	aceclofenac	0.00265132	0.161731	1.12e-05
1961	HIV-1	guanabenz	0.00266979	0.162857	1.38e-05
6873	WNV	H-89	0.0027193	0.165878	5e-07
5960	HSV-2	estradiol	0.00271934	0.16588	1e-08
1154	HSV-1	alvespimycin	0.00272043	0.165946	1e-07
2915	Polio	etamsylate	0.00299035	0.167459	1.52e-05
4729	Tularensis	meclofenoxate	0.002802	0.16812	1.36e-05
2509	Borna-disease-virus	fluorometholone	0.00275694	0.168173	1.06e-05
2846	EBV	trimethadione	0.00276345	0.168571	2.8e-05
1838	EBV	procaine	0.00276345	0.168571	1.46e-05
6267	EBV	quinidine	0.00276345	0.168571	1.06e-05
2786	EBV	corynanthine	0.00276345	0.168571	1.02e-05
3351	Influenza-A	(+/-)-catechin	0.00278535	0.169906	1.38e-05
3972	Rhinovirus-16	proglumide	0.00286033	0.17448	1.2e-05
2853	WNV	sisomicin	0.00286095	0.174518	2.8e-06
4206	C.perfringens-epsilon-toxin	pepstatin	0.00286641	0.174851	5.8e-06
1121	EBV	DL-PPMP	0.00287003	0.175072	2e-06
1115	EBV	phenanthridinone	0.00287003	0.175072	5.12e-05
7175	HCV	hecogenin	0.00287402	0.175315	9.2e-06
2865	HSV-2	resveratrol	0.00288088	0.175733	1.76e-05
4225	EBV	carcinine	0.00288259	0.175838	2.2e-05
6728	HCV	betamethasone	0.0028885	0.176198	1.02e-05
4471	Vaccinia-virus	astemizole	0.00288903	0.176231	8.8e-06
6468	C.parvum	megestrol	0.00289186	0.176403	1.04e-05
2813	C.parvum	Prestwick-691	0.00289186	0.176403	1.38e-05
1923	Polio	apomorphine	0.00300541	0.177319	6.4e-06
4827	HSV-2	emetine	0.00291467	0.177795	7.2e-06
4328	Rhinovirus-16	lanatoside C	0.00292368	0.178344	4e-06
972	Rhinovirus-16	geldanamycin	0.00292659	0.178522	1e-06
2546	HIV-1	meclofenoxate	0.00292943	0.178695	1.36e-05
5921	WNV	thioridazine	0.00294379	0.179571	1e-05
4781	RSV	benperidol	0.00300107	0.180064	1.04e-05
5320	HIV-1	paclitaxel	0.00295204	0.180075	4.6e-06
2927	HSV-2	sanguinarine	0.00302526	0.181515	1.2e-05
3808	S.aureus-toxin	lycorine	0.00302549	0.18153	1.24e-05
6920	EBV	AG-012559	0.00297806	0.181662	1e-05
6223	HSV-2	dizocilpine	0.00298535	0.182107	1.18e-05
2564	Measles	cefazolin	0.00304335	0.182601	8.4e-06
4463	HIV-1	LY-294002	0.00305045	0.183027	1e-05
3444	Influenza-A	ribostamycin	0.0030094	0.183573	7.2e-06
1619	Polio	methyldopa	0.00301746	0.184065	1.9e-05
362	EBV	sirolimus	0.00303355	0.185047	1e-07
1883	Rhinovirus-16	sulfathiazole	0.00304171	0.185544	1.56e-05
5354	RSV	mitoxantrone	0.00314829	0.185749	7.8e-06
4218	HSV-2	pregnenolone	0.00304899	0.185989	1.26e-05
965	Rhinovirus-16	felodipine	0.00305122	0.186124	1e-05
5221	Vaccinia-virus	trifluoperazine	0.00306043	0.186686	1e-05
905	Rhinovirus-16	clotrimazole	0.00307424	0.187528	5e-05
6173	RSV	valproic acid	0.00313158	0.187895	0.0002
5043	Influenza-A	piracetam	0.00309192	0.188607	2.82e-05
3538	Borna-disease-virus	Prestwick-1083	0.00310195	0.189219	8.8e-06
4274	HCV	fenoprofen	0.00310575	0.189451	7.2e-06
7074	Rhinovirus-16	MS-275	0.00311094	0.189767	1e-05
2517	HSV-2	cefalotin	0.00311173	0.189815	9.6e-06
6182	Borna-disease-virus	nordihydroguaiaretic acid	0.00317565	0.193715	1e-06
3701	HCV	levomepromazine	0.00319654	0.194989	9e-06
4385	Rhinovirus-16	thiostrepton	0.00322476	0.19671	2.4e-06
1883	HPV-16	sulfathiazole	0.00328003	0.196802	1.56e-05
7067	HIV-1	GW-8510	0.00324839	0.198152	1e-05
1726	Ebola	thiocolchicoside	0.0032508	0.198299	7e-06
1780	HIV-2	cinchonidine	0.00328003	0.200082	1.36e-05
6236	Borna-disease-virus	(+)-chelidonine	0.0032836	0.2003	1.08e-05
2469	C.difficile-toxin	norcyclobenzaprine	0.00328996	0.200688	1.54e-05
1916	Rhinovirus-16	niclosamide	0.00329283	0.200863	1.22e-05
1057	Reovirus	monorden	0.00330445	0.201572	1e-07
3808	Rhinovirus-16	lycorine	0.00342337	0.201979	1.24e-05
5018	Rhinovirus-16	metixene	0.00336874	0.202125	1.16e-05
1435	HSV-2	aztreonam	0.00331911	0.202465	9.2e-06
2934	HCV	memantine	0.00332155	0.202615	1.86e-05
5488	Vaccinia-virus	gemfibrozil	0.00334753	0.204199	1.6e-05
3848	T.cruzi	dicoumarol	0.00335766	0.204817	1.18e-05
6051	C.difficile-toxin	lycorine	0.00336333	0.205163	1.24e-05
2658	HIV-1	anisomycin	0.00337785	0.206049	1.5e-05
4733	HSV-2	sulfamethoxypyridazine	0.00340334	0.207604	1.42e-05
1598	Rhinovirus-16	colchicine	0.00346875	0.208125	1e-05
5799	C.perfringens-epsilon-toxin	tremorine	0.00341221	0.208145	1.5e-05
6958	RSV	sirolimus	0.00342895	0.209166	1e-07
4302	WNV	trichostatin A	0.00349166	0.2095	1e-07
2552	HSV-2	flunixin	0.0034383	0.209736	8.2e-06
1288	Measles	flupentixol	0.00343859	0.209754	7.8e-06
1288	Salmonella	flupentixol	0.00343859	0.209754	7.8e-06
6053	C.difficile-toxin	chlorcyclizine	0.00345767	0.210918	1.18e-05
7397	Hendra-virus	alexidine	0.003463	0.211243	6.8e-06
7397	Nipah-virus	alexidine	0.003463	0.211243	6.8e-06
2918	EBV	sotalol	0.00347672	0.21208	1.3e-05
6027	HSV-2	pempidine	0.00348117	0.212351	1.3e-05
5681	Influenza-A	dehydrocholic acid	0.00351155	0.214204	9.6e-06
1160	Polio	monorden	0.00354271	0.216105	1e-07
5107	Polio	rilmenidine	0.00354271	0.216105	8.4e-06
4718	EBV	cefamandole	0.00357415	0.218023	8.2e-06
7255	EBV	moxisylyte	0.00357415	0.218023	1.26e-05
3579	Influenza-A	kaempferol	0.00357772	0.218241	1.4e-05
4181	Measles	betulinic acid	0.00360327	0.2198	8.8e-06
2129	WNV	retrorsine	0.00361236	0.220354	1.14e-05
1344	HSV-2	amantadine	0.00361458	0.220489	9.6e-06
7333	Vaccinia-virus	fluvoxamine	0.00362331	0.221022	9.2e-06
1841	EBV	todralazine	0.00365622	0.223029	1.48e-05
1905	C.perfringens-epsilon-toxin	thioridazine	0.00365747	0.223106	9.8e-06
7342	Influenza-A	epitiostanol	0.00365748	0.223106	1.3e-05
4371	HIV-1	guaifenesin	0.00372624	0.223574	2.02e-05
1141	HSV-2	tyrphostin AG-1478	0.00367437	0.224137	3.16e-05
2547	RSV	levonorgestrel	0.00368006	0.224484	1.28e-05
5364	Polio	anisomycin	0.00368537	0.224808	1.5e-05
4461	C.parvum	fluphenazine	0.00368702	0.224908	1e-05
1907	BVDV	captopril	0.00369004	0.225092	1.72e-05
1960	Ricin	aciclovir	0.00369004	0.225092	1.78e-05
1385	HPV-16	mianserin	0.00369004	0.225092	1.32e-05
1944	BVDV	moroxydine	0.00369004	0.225092	1.92e-05
6776	Rhinovirus-16	drofenine	0.00369315	0.225282	1.14e-05
1749	HIV-1	ajmaline	0.00376461	0.225876	1.22e-05
4827	WNV	emetine	0.00376884	0.226131	7.2e-06
3202	Cocksackievirus-B3	terbutaline	0.00370854	0.226221	7.2e-06
6306	HIV-1	ascorbic acid	0.00372624	0.227301	2.24e-05
6826	Influenza-A	amrinone	0.00373045	0.227558	2.14e-05
6416	Influenza-A	PF-00539758-00	0.00373848	0.228047	1e-05
4140	Reovirus	benzathine benzylpenicillin	0.00380078	0.228047	4.2e-06
317	RSV	N-phenylanthranilic acid	0.00375086	0.228802	1e-05
6162	T.cruzi	mesalazine	0.00375676	0.229162	2.62e-05
6168	Borna-disease-virus	valproic acid	0.00375856	0.229272	0.001
5074	C.parvum	chlorpromazine	0.00377171	0.230074	1.12e-05
6758	EBV	desoxycortone	0.00377438	0.230237	1.22e-05
2915	HCV	etamsylate	0.00420183	0.2311	1.52e-05
1512	Tularensis	zimeldine	0.00380499	0.232105	9.8e-06
5021	Vaccinia-virus	suloctidil	0.00380865	0.232328	1.18e-05
4835	Vaccinia-virus	nifuroxazide	0.00380865	0.232328	1.46e-05
5430	Vaccinia-virus	procaine	0.00380865	0.232328	1.46e-05
7459	HCV	esculetin	0.00380928	0.232366	2.24e-05
6364	RSV	erastin	0.00382095	0.233078	2e-05
2839	HSV-2	pyrazinamide	0.00384734	0.234688	3.24e-05
3218	HCV	sulfafurazole	0.00385705	0.23528	1.5e-05
4191	C.difficile-toxin	conessine	0.00386202	0.235583	1.12e-05
1546	Ebola	glibenclamide	0.00386733	0.235907	8e-06
3285	HSV-2	meclozine	0.00388136	0.236763	8.6e-06
2176	RSV	citiolone	0.0038886	0.237204	2.52e-05
4361	Hendra-virus	flutamide	0.00396248	0.237749	1.44e-05
4361	Nipah-virus	flutamide	0.00396248	0.237749	1.44e-05
4994	WNV	clomifene	0.0039189	0.239053	6.6e-06
6517	RSV	articaine	0.0039278	0.239596	1.24e-05
4799	RSV	zalcitabine	0.00393921	0.240292	1.9e-05
4448	WNV	trifluoperazine	0.00397207	0.242296	1e-05
7049	HSV-2	AH-6809	0.00398051	0.242811	1e-06
1827	Rhinovirus-16	dapsone	0.00401266	0.244772	1.62e-05
2887	EBV	tubocurarine chloride	0.00401663	0.245014	5.2e-06
973	EBV	quinostatin	0.0040443	0.246702	1e-05
2797	EBV	seneciphylline	0.0040443	0.246702	1.2e-05
1645	S.aureus-toxin	vorinostat	0.00405895	0.247596	1e-05
1420	HIV-1	flufenamic acid	0.00405994	0.247656	1.42e-05
6900	HIV-1	0297417-0002B	0.0040707	0.248312	1e-05
1410	HSV-2	levamisole	0.00407778	0.248745	1.66e-05
5330	HSV-2	rolipram	0.00407778	0.248745	1.46e-05
1977	HPV-16	miconazole	0.00410004	0.250103	9.6e-06
1411	HPV-16	thalidomide	0.00410004	0.250103	1.54e-05
1989	Ricin	phenazone	0.00410004	0.250103	2.12e-05
5663	H.pylori	procainamide	0.00417168	0.250301	1.48e-05
1058	C.perfringens-epsilon-toxin	vorinostat	0.00410557	0.25044	1e-05
6264	Tularensis	tropine	0.00411848	0.251227	2.84e-05
3864	WNV	ethisterone	0.00411851	0.251229	1.28e-05
5013	Polio	megestrol	0.00412094	0.251377	1.04e-05
5076	Influenza-A	harmalol	0.00412263	0.251481	1.46e-05
1833	HSV-2	8-azaguanine	0.00413317	0.252123	2.62e-05
2679	HBV	monorden	0.00414301	0.252723	1e-07
7050	HSV-1	lomustine	0.00417141	0.254456	0.0001
2739	HIV-1	iopromide	0.00418243	0.255128	5e-06
2929	Influenza-A	fursultiamine	0.00425681	0.255409	9.2e-06
4781	HCV	benperidol	0.00434547	0.256383	1.04e-05
7535	Influenza-A	irinotecan	0.00420404	0.256446	0.0001
4841	Influenza-A	R-atenolol	0.00420465	0.256484	1.5e-05
3852	HSV-2	lanatoside C	0.00421684	0.257227	4e-06
6394	RSV	C-75	0.00423445	0.258301	1e-05
2763	HIV-1	lobeline	0.00424638	0.259029	1.06e-05
6842	EBV	iopromide	0.00424706	0.259071	5e-06
2787	EBV	galantamine	0.00424706	0.259071	1.08e-05
4121	HSV-2	ginkgolide A	0.00427818	0.260969	9.8e-06
4124	Tularensis	oxamniquine	0.00427967	0.26106	1.44e-05
61	C.parvum	metformin	0.00429949	0.262269	1e-05
1988	HSV-2	captopril	0.00434696	0.265165	1.72e-05
1844	HCV	dexpanthenol	0.00436236	0.266104	1.94e-05
595	Rhinovirus-16	resveratrol	0.00437971	0.267162	5e-05
5885	Measles	bambuterol	0.00439071	0.267834	1e-05
2805	EBV	harmaline	0.00448984	0.26939	1.4e-05
5460	Influenza-A	acemetacin	0.00442889	0.270162	9.6e-06
2114	Influenza-A	oxymetazoline	0.00444863	0.271366	1.34e-05
5337	Rhinovirus-16	ethaverine	0.00445059	0.271486	9.2e-06
4013	Influenza-A	brompheniramine	0.00445263	0.27161	9.2e-06
7537	Rhinovirus-16	CP-319743	0.0044604	0.272084	1e-05
7011	EBV	tiratricol	0.00448358	0.273498	6.4e-06
3279	Salmonella	primaquine	0.00457597	0.274558	8.8e-06
6402	Influenza-A	3-nitropropionic acid	0.00450832	0.275007	1e-05
7428	Hantaan-virus	enalapril	0.00451004	0.275113	8.2e-06
1727	BK-virus	trimetazidine	0.00451004	0.275113	1.18e-05
2537	Hendra-virus	phenazopyridine	0.00455074	0.277595	1.6e-05
2537	Nipah-virus	phenazopyridine	0.00455074	0.277595	1.6e-05
2686	HSV-1	tanespimycin	0.00458213	0.27951	1e-06
5928	C.parvum	PF-00875133-00	0.00466999	0.284869	1e-05
2540	Rhinovirus-16	podophyllotoxin	0.00467438	0.285137	9.6e-06
1791	KSHV	8-azaguanine	0.00476755	0.286053	2.62e-05
2128	HSV-2	meclofenamic acid	0.00470584	0.287056	1.18e-05
4385	Marburg	thiostrepton	0.00479912	0.287947	2.4e-06
1103	dengue-2	demecolcine	0.00492005	0.290283	1.17e-05
2656	EBV	ouabain	0.00479521	0.292508	5.4e-06
1323	Polio	cefadroxil	0.00479594	0.292552	1.1e-05
3361	Vaccinia-virus	iocetamic acid	0.00485462	0.296132	6.6e-06
2439	HIV-1	menadione	0.0049386	0.296316	2.32e-05
2011	Echovirus-1	cotinine	0.004915	0.299815	2.26e-05
2812	HSV-2	hydroxyachillin	0.00508382	0.299945	1.42e-05
2041	dengue-2	methotrexate	0.00492005	0.300123	8.8e-06
1750	dengue-2	harmol	0.00492005	0.300123	1.58e-05
1390	HPV-16	thioproperazine	0.00492005	0.300123	6.2e-06
1979	BK-virus	amprolium	0.00492005	0.300123	1.26e-05
6757	C.perfringens-epsilon-toxin	fluoxetine	0.00492702	0.300548	1.16e-05
3449	HIV-1	sulfanilamide	0.00494991	0.301945	2.32e-05
6586	Rhinovirus-16	dinoprostone	0.00498188	0.303894	1e-05
3740	Borna-disease-virus	gossypol	0.00498671	0.304189	7.8e-06
5273	C.perfringens-epsilon-toxin	haloperidol	0.00501234	0.305753	1.06e-05
3035	HIV-1	sulconazole	0.0050144	0.305879	8.6e-06
4652	HSV-1	phenoxybenzamine	0.00502038	0.306243	1.18e-05
7154	HCV	vinburnine	0.00503177	0.306938	1.36e-05
4978	Dengue-2	lovastatin	0.00504286	0.307614	9.8e-06
3038	C.perfringens-epsilon-toxin	profenamine	0.00504869	0.30797	1.14e-05
1741	Influenza-A	laudanosine	0.0050752	0.309587	1.12e-05
436	HIV-1	fasudil	0.00507762	0.309735	1e-05
7050	Cowpox	lomustine	0.00516613	0.309968	0.0001
3232	WNV	mitoxantrone	0.00519141	0.311485	7.8e-06
4983	Influenza-A	daunorubicin	0.00513974	0.313524	7e-06
5344	Rhinovirus-16	metergoline	0.00530275	0.318165	1e-05
1237	HCV	fluphenazine	0.00522888	0.318961	1e-05
6254	EBV	methanthelinium bromide	0.00522942	0.318994	9.6e-06
1268	EBV	pentoxyverine	0.00522942	0.318994	7.6e-06
1114	HSV-2	tyrphostin AG-825	0.00532094	0.319256	2.52e-05
3996	EBV	oxybuprocaine	0.00524385	0.319875	1.16e-05
4999	RSV	bezafibrate	0.00525277	0.320419	1.1e-05
5611	WNV	cotinine	0.00525867	0.320779	2.26e-05
2698	HCV	fulvestrant	0.0052686	0.321385	1e-08
5213	Influenza-A	LY-294002	0.00527306	0.321657	1e-07
6003	C.perfringens-epsilon-toxin	nortriptyline	0.0052976	0.323154	1.34e-05
3242	Vaccinia-virus	carcinine	0.00530243	0.323448	2.2e-05
6940	Tularensis	sirolimus	0.00530856	0.323822	1e-07
4220	HSV-2	gabexate	0.00532709	0.324952	9.6e-06
5212	Ebola	prochlorperazine	0.0053271	0.324953	1e-05
1993	BVDV	acebutolol	0.00533005	0.325133	1.08e-05
1397	HIV-2	tetracycline	0.00533005	0.325133	8.4e-06
1397	HPV-16	tetracycline	0.00533005	0.325133	8.4e-06
1721	dengue-2	ceftazidime	0.00533005	0.325133	6.2e-06
1984	BVDV	oxetacaine	0.00533005	0.325133	8.6e-06
1403	HSV-2	midodrine	0.00534659	0.326142	1.38e-05
4846	HSV-2	quercetin	0.00535007	0.326354	1.18e-05
1988	Measles	captopril	0.00545552	0.327331	1.72e-05
6246	HSV-2	saquinavir	0.00538101	0.328242	5.2e-06
4805	RSV	tolnaftate	0.00538308	0.328368	1.3e-05
4082	HIV-1	yohimbic acid	0.00538587	0.328538	1.12e-05
4536	Marburg	ciclacillin	0.00540994	0.330006	1.18e-05
5479	Influenza-A	trimetazidine	0.00541138	0.330094	1.18e-05
5600	SARS	valproic acid	0.00541851	0.330529	0.0005
6780	Vaccinia-virus	pimozide	0.00542078	0.330668	8.6e-06
4651	Rhinovirus-16	cephaeline	0.00543126	0.331307	6e-06
1811	Influenza-A	diprophylline	0.00543675	0.331642	1.58e-05
7338	Influenza-A	sotalol	0.00543675	0.331642	1.3e-05
3877	Polio	santonin	0.00544271	0.332005	1.62e-05
4362	Salmonella	tolbutamide	0.00545552	0.332787	1.48e-05
3515	EBV	talampicillin	0.00549003	0.334892	7.8e-06
4686	EBV	tiapride	0.00549003	0.334892	1.1e-05
2857	Tularensis	mycophenolic acid	0.00549027	0.334906	1.24e-05
6369	Rhinovirus-16	erastin	0.0054998	0.335488	2e-05
3729	HIV-1	ketoprofen	0.00553301	0.337514	1.58e-05
6264	Ebola	tropine	0.0056339	0.338034	2.84e-05
2703	C.perfringens-epsilon-toxin	wortmannin	0.00555398	0.338793	1e-08
6264	RSV	tropine	0.00576594	0.34019	2.84e-05
2750	HIV-1	harmine	0.0055852	0.340697	1.6e-05
6278	HSV-2	lidoflazine	0.00558632	0.340765	8.2e-06
2498	HCV	vancomycin	0.00561081	0.34226	2.6e-06
3031	Borna-disease-virus	rolitetracycline	0.00561134	0.342292	7.6e-06
1783	Polio	epivincamine	0.00580157	0.342293	1.12e-05
1604	Rhinovirus-2	clorgiline	0.00573299	0.34398	1.3e-05
2227	Rhinovirus-16	terfenadine	0.00564	0.34404	8.4e-06
4190	Rhinovirus-16	norcyclobenzaprine	0.00564	0.34404	1.54e-05
266	RSV	thalidomide	0.00564616	0.344416	0.0001
5397	Dengue-2	nicardipine	0.00565796	0.345136	7.8e-06
5470	Dengue-2	roxarsone	0.00565796	0.345136	1.52e-05
3165	Rhinovirus-16	tretinoin	0.00568397	0.346722	1.34e-05
4238	HSV-2	seneciphylline	0.0056978	0.347566	1.2e-05
3887	HSV-2	camptothecin	0.00579867	0.34792	1.14e-05
2670	Rhinovirus-16	alpha-estradiol	0.00572678	0.349334	1e-08
4128	Rhinovirus-16	azacitidine	0.00573087	0.349583	1.64e-05
1946	Hendra-virus	famotidine	0.00573299	0.349713	1.18e-05
1946	Nipah-virus	famotidine	0.00573299	0.349713	1.18e-05
1899	BVDV	idoxuridine	0.00574006	0.350143	1.12e-05
7137	Newcastle-disease-virus	methylprednisolone	0.00574006	0.350143	1.06e-05
2009	dengue-2	verapamil	0.00574006	0.350143	8.2e-06
1893	Ricin	doxylamine	0.00574006	0.350143	1.02e-05
1991	BK-virus	amylocaine	0.00574006	0.350143	1.48e-05
1394	HPV-16	acenocoumarol	0.00574006	0.350143	1.14e-05
959	Newcastle-disease-virus	bucladesine	0.00574006	0.350143	2e-06
3348	Ebola	azacitidine	0.0057539	0.350988	1.64e-05
7339	Vaccinia-virus	tracazolate	0.00576866	0.351888	1.18e-05
4147	Marburg	xylazine	0.00577358	0.352188	1.82e-05
1769	RSV	ipratropium bromide	0.00587642	0.352585	9.8e-06
4782	M.tuberculosis	canavanine	0.00578681	0.352995	1.36e-05
5093	Polio	carbamazepine	0.00580867	0.354329	1.7e-05
1833	Reovirus	8-azaguanine	0.00591333	0.3548	2.62e-05
1160	HSV-1	monorden	0.00592113	0.355268	1e-07
1522	Vaccinia-virus	ciprofloxacin	0.00582739	0.355471	1.08e-05
7439	WNV	disopyramide	0.00586324	0.357658	1.18e-05
6500	RSV	nipecotic acid	0.00586393	0.3577	3.1e-05
3233	RSV	amikacin	0.00586393	0.3577	6.6e-06
2683	C.parvum	nordihydroguaiaretic acid	0.00587044	0.358097	1e-06
325	Rhinovirus-16	monorden	0.00587841	0.358583	1e-07
5515	Measles	bufexamac	0.00597647	0.358588	1.8e-05
6402	C.perfringens-epsilon-toxin	3-nitropropionic acid	0.00598329	0.358997	1e-05
3747	HCV	flunisolide	0.00592856	0.361642	9.2e-06
2809	RSV	glimepiride	0.00603492	0.362095	8.2e-06
2424	Ebola	meclozine	0.00595122	0.363024	8.6e-06
1287	Influenza-A	bisoprolol	0.00596384	0.363794	9e-06
1075	Rhinovirus-16	fluphenazine	0.00596689	0.363981	1e-05
6427	C.perfringens-epsilon-toxin	STOCK1N-35215	0.00606891	0.364135	1e-05
7498	RSV	irinotecan	0.00607641	0.364584	0.0001
4102	HSV-2	tenoxicam	0.00597948	0.364748	1.18e-05
4225	C.parvum	carcinine	0.00608342	0.365005	2.2e-05
3575	Borna-disease-virus	ondansetron	0.00598844	0.365295	1.22e-05
5085	Influenza-A	adipiodone	0.00600224	0.366137	3.6e-06
2957	C.difficile-toxin	pyrvinium	0.00600464	0.366283	3.4e-06
2727	Ebola	azlocillin	0.0060136	0.36683	8.2e-06
1404	C.difficile-toxin	ranitidine	0.00602407	0.367468	1.14e-05
6804	EBV	midodrine	0.00602912	0.367776	1.38e-05
5815	EBV	clindamycin	0.00602912	0.367776	8.6e-06
6215	EBV	gallamine triethiodide	0.00602912	0.367776	4.4e-06
2772	EBV	cinchonidine	0.00602912	0.367776	1.36e-05
1312	Polio	levothyroxine sodium	0.00603864	0.368357	5.2e-06
4108	Tularensis	etofenamate	0.00605274	0.369217	1.08e-05
3267	HIV-1	ciclosporin	0.00605393	0.36929	3.4e-06
6893	C.perfringens-epsilon-toxin	pioglitazone	0.00615538	0.369323	1e-05
2691	HIV-1	15-delta prostaglandin J2	0.00615761	0.369456	1e-05
3412	HIV-1	fenoprofen	0.00606702	0.370088	7.2e-06
2167	HIV-1	benzocaine	0.00606702	0.370088	2.42e-05
1829	KSHV	acetohexamide	0.00610818	0.372599	1.24e-05
1495	Influenza-A	sulfaguanidine	0.00610829	0.372605	1.86e-05
3519	Reovirus	etomidate	0.00611418	0.372965	1.64e-05
2546	Rhinovirus-2	meclofenoxate	0.00622089	0.373253	1.36e-05
5794	Rhinovirus-16	methazolamide	0.00613643	0.374322	1.7e-05
6742	Rhinovirus-16	carbachol	0.00613643	0.374322	2.18e-05
7349	Varicella-zoster-virus	fursultiamine	0.00615006	0.375154	9.2e-06
7355	Metapneumovirus	harpagoside	0.00615006	0.375154	8e-06
2834	Metapneumovirus	pentamidine	0.00615006	0.375154	6.8e-06
3435	HIV-2	atractyloside	0.00615006	0.375154	5e-06
3435	Newcastle-disease-virus	atractyloside	0.00615006	0.375154	5e-06
833	Metapneumovirus	5255229	0.00615006	0.375154	1.3e-05
5778	Dengue-2	ebselen	0.00615765	0.375616	1.46e-05
5832	Polio	iopamidol	0.00618917	0.377539	5.2e-06
4700	Polio	salbutamol	0.00618917	0.377539	1.68e-05
6558	HSV-2	5194442	0.00620852	0.37872	2e-05
411	Ebola	sodium phenylbutyrate	0.00622263	0.37958	0.001
5998	Vaccinia-virus	homochlorcyclizine	0.00625214	0.381381	1.04e-05
3382	HIV-1	3-acetylcoumarin	0.00625585	0.381607	2.12e-05
2094	HCV	levamisole	0.00626016	0.38187	1.66e-05
3835	Influenza-A	metamizole sodium	0.00626304	0.382046	1.2e-05
3926	Salmonella	pempidine	0.00630006	0.384304	1.3e-05
2697	T.cruzi	fluphenazine	0.00630006	0.384304	1e-05
4477	EBV	kinetin	0.00630753	0.384759	1.86e-05
6561	Rhinovirus-16	STOCK1N-35874	0.00630955	0.384883	1.4e-05
4263	C.difficile-toxin	primaquine	0.0063588	0.387887	8.8e-06
5724	Rhinovirus-16	mefloquine	0.00640417	0.390655	9.6e-06
6082	C.parvum	tetrandrine	0.00640976	0.390995	6.4e-06
487	Measles	pirinixic acid	0.00640976	0.390995	0.0001
6666	HIV-1	dicloxacillin	0.0064321	0.392358	8.2e-06
4655	Tularensis	enoxacin	0.00644213	0.39297	1.24e-05
3065	Ebola	primidone	0.00645168	0.393553	1.84e-05
6221	Metapneumovirus	calycanthine	0.00656007	0.393604	1.16e-05
7139	HSV-2	1,4-chrysenequinone	0.00645299	0.393632	1.54e-05
4307	Rhinovirus-16	pempidine	0.0064751	0.394981	1.3e-05
1649	HSV-2	trifluoperazine	0.00648134	0.395362	1e-05
2766	Measles	pseudopelletierine	0.00652037	0.397742	2.1e-05
4271	WNV	cloperastine	0.00664194	0.398516	1.1e-05
2468	Borna-disease-virus	cetirizine	0.00653818	0.398829	8.6e-06
3308	Clostridium-perfringens-toxin	dinoprost	0.00656007	0.400164	8.4e-06
1686	Varicella-zoster-virus	acetazolamide	0.00656007	0.400164	1.8e-05
5302	Newcastle-disease-virus	mimosine	0.00656007	0.400164	2.02e-05
2043	HCV	paclitaxel	0.00656034	0.400181	4.6e-06
7187	C.perfringens-epsilon-toxin	terazosin	0.00656624	0.40054	9.4e-06
4130	EBV	pheniramine	0.00659182	0.402101	1.12e-05
2868	EBV	phenindione	0.00659182	0.402101	1.8e-05
407	HCV	sodium phenylbutyrate	0.00660136	0.402683	0.001
6422	Rhinovirus-2	STOCK1N-35215	0.00662277	0.403989	1e-05
999	Tularensis	monorden	0.00664112	0.405108	1e-07
1051	Rhinovirus-2	alvespimycin	0.00664359	0.405259	1e-07
1051	EBV	alvespimycin	0.00664359	0.405259	1e-07
2853	Vaccinia-virus	sisomicin	0.00675573	0.405344	2.8e-06
6417	Borna-disease-virus	erastin	0.00664505	0.405348	2e-05
4201	C.perfringens-epsilon-toxin	atovaquone	0.00665571	0.405998	1.1e-05
1930	HSV-2	zimeldine	0.00665871	0.406181	9.8e-06
3007	Influenza-A	indoprofen	0.00669949	0.408669	1.42e-05
3973	C.difficile-toxin	mexiletine	0.00671751	0.409768	1.86e-05
6864	HIV-1	STOCK1N-28457	0.00672288	0.410096	2e-05
4156	Tularensis	metrizamide	0.00684296	0.410577	5e-06
5947	WNV	monorden	0.00674714	0.411575	1e-07
5531	Marburg	dropropizine	0.00682392	0.416259	1.7e-05
4806	Borna-disease-virus	amantadine	0.00682411	0.416271	9.6e-06
5860	Influenza-A	pridinol	0.00685933	0.418419	1.02e-05
2748	EBV	tetrahydroalstonine	0.00688197	0.4198	1.14e-05
5275	HSV-2	digoxigenin	0.00688945	0.420257	1.02e-05
1761	HIV-1	syrosingopine	0.0068956	0.420632	6e-06
3712	Rhinovirus-16	flumetasone	0.00692472	0.422408	9.8e-06
5968	Influenza-A	H-7	0.00707405	0.424443	0.0001
6864	Influenza-A	STOCK1N-28457	0.00708291	0.424975	2e-05
1567	BVDV	methylprednisolone	0.00697007	0.425174	1.06e-05
7149	Newcastle-disease-virus	aconitine	0.00697007	0.425174	6.2e-06
1579	BK-virus	tremorine	0.00697007	0.425174	1.5e-05
3457	Metapneumovirus	hecogenin	0.00697007	0.425174	9.2e-06
1731	HIV-2	cyclizine	0.00697007	0.425174	1.32e-05
7346	Metapneumovirus	Prestwick-967	0.00697007	0.425174	2.58e-05
4757	Rhinovirus-16	PNU-0230031	0.00699384	0.426624	1e-06
5399	Polio	carbimazole	0.00699443	0.42666	2.14e-05
6396	HIV-1	F0447-0125	0.00699795	0.426875	1e-05
1414	RSV	antimycin A	0.00700725	0.427442	7.2e-06
6574	Rhinovirus-16	5155877	0.00702043	0.428246	1e-05
1580	Dengue-2	furosemide	0.00702603	0.428588	1.2e-05
4267	Rhinovirus-16	demeclocycline	0.00705217	0.430183	8e-06
3632	Influenza-A	PNU-0230031	0.00706507	0.430969	1e-06
1673	HIV-1	sulfaphenazole	0.0072039	0.432234	1.28e-05
2670	C.perfringens-epsilon-toxin	alpha-estradiol	0.00725328	0.435197	1e-08
7037	Influenza-A	adiphenine	0.00714076	0.435587	1.14e-05
370	HCV	troglitazone	0.00714645	0.435933	1e-05
5296	HSV-2	profenamine	0.00714878	0.436076	1.14e-05
4545	EBV	ethotoin	0.00715647	0.436544	1.96e-05
2330	Dengue-2	trichostatin A	0.00716789	0.437241	1e-07
419	Reovirus	chlorpromazine	0.00717685	0.437788	1e-05
4533	EBV	homosalate	0.00717795	0.437855	1.52e-05
2750	HSV-2	harmine	0.00730102	0.438061	1.6e-05
4983	HIV-1	daunorubicin	0.00730949	0.43857	7e-06
1929	HSV-2	cotinine	0.00720131	0.43928	2.26e-05
4787	Polio	trimethylcolchicinic acid	0.0072021	0.439328	1.16e-05
1853	HBV	diprophylline	0.00722754	0.44088	1.58e-05
831	C.perfringens-epsilon-toxin	tanespimycin	0.00724236	0.441784	1e-06
6845	C.perfringens-epsilon-toxin	ampyrone	0.00724236	0.441784	1.96e-05
4233	Rhinovirus-16	procyclidine	0.00724583	0.441996	1.24e-05
6388	HSV-1	orlistat	0.00725328	0.44245	1e-05
6748	Rhinovirus-16	bisoprolol	0.0072682	0.44336	9e-06
1527	Vaccinia-virus	moroxydine	0.00727625	0.443851	1.92e-05
1295	RSV	testosterone	0.00740149	0.444089	1.16e-05
2227	C.difficile-toxin	terfenadine	0.00740781	0.444468	8.4e-06
6998	Reovirus	LY-294002	0.00730527	0.445621	1e-05
3795	Measles	santonin	0.00732018	0.446531	1.62e-05
1331	Cowpox	ciclosporin	0.00734382	0.447973	3.4e-06
2970	Influenza-A	loracarbef	0.00734598	0.448105	1.08e-05
3928	HCV	famprofazone	0.00736006	0.448964	1.06e-05
5334	C.parvum	metanephrine	0.00736495	0.449262	1.72e-05
1733	C.jejuni	sulfasalazine	0.00736796	0.449446	1e-05
1733	Group-B-streptococcus	sulfasalazine	0.00736796	0.449446	1e-05
1886	HIV-2	naphazoline	0.00738007	0.450185	1.62e-05
5300	BVDV	florfenicol	0.00738007	0.450185	1.12e-05
6698	Vaccinia-virus	tacrine	0.00739491	0.45109	1.58e-05
1055	RSV	chlorpromazine	0.00740762	0.451865	1e-06
1916	HSV-2	niclosamide	0.00753755	0.452253	1.22e-05
3739	HIV-1	foliosidine	0.00741544	0.452342	1.3e-05
4676	Polio	testosterone	0.00741949	0.452589	1.16e-05
2829	Polio	cetirizine	0.00741949	0.452589	8.6e-06
2829	EBV	cetirizine	0.00747973	0.452589	8.6e-06
6184	Reovirus	tanespimycin	0.00742282	0.452792	1e-06
2466	Salmonella	6-azathymine	0.00743808	0.453723	3.14e-05
6246	RSV	saquinavir	0.00756761	0.454056	5.2e-06
5629	HIV-1	pentetic acid	0.00744849	0.454358	1.02e-05
5965	C.difficile-toxin	LY-294002	0.0074671	0.455493	1e-05
6249	EBV	DL-thiorphan	0.00747973	0.456263	1.58e-05
4705	EBV	Prestwick-685	0.00747973	0.456263	1.06e-05
3238	C.difficile-toxin	ambroxol	0.00748762	0.456745	9.6e-06
6957	C.difficile-toxin	estradiol	0.00748762	0.456745	1e-08
1141	Marburg	tyrphostin AG-1478	0.00762154	0.457293	3.16e-05
1373	Ebola	clindamycin	0.00755339	0.460757	8.6e-06
5306	HSV-2	propofol	0.0075555	0.460885	2.24e-05
4713	RSV	0175029-0000	0.00770527	0.462316	1e-05
1630	Rhinovirus-16	fulvestrant	0.00762097	0.464879	1e-06
1764	Tularensis	piperlongumine	0.00762658	0.465221	1.26e-05
5396	Vaccinia-virus	dequalinium chloride	0.00763756	0.465891	7.6e-06
4745	WNV	lomefloxacin	0.00764917	0.4666	1.04e-05
7333	Metapneumovirus	fluvoxamine	0.00779008	0.467405	9.2e-06
942	Metapneumovirus	prazosin	0.00779008	0.467405	1e-05
2722	Polio	cinoxacin	0.00767191	0.467986	1.52e-05
5601	Ebola	estradiol	0.00769901	0.469639	1e-08
4843	C.perfringens-epsilon-toxin	zuclopenthixol	0.00772232	0.471062	9.2e-06
7330	Polio	gibberellic acid	0.00788085	0.472851	1.16e-05
3278	Influenza-A	naringenin	0.00775633	0.473136	1.46e-05
1501	Influenza-A	tolnaftate	0.00777304	0.474156	1.3e-05
4661	Influenza-A	sulfafurazole	0.00777304	0.474156	1.5e-05
1884	RSV	cimetidine	0.00778446	0.474852	1.58e-05
6837	EBV	clidinium bromide	0.00778728	0.475024	9.2e-06
3442	Newcastle-disease-virus	calcium folinate	0.00779008	0.475195	7.8e-06
1864	Newcastle-disease-virus	chlorpromazine	0.00779008	0.475195	1.12e-05
1395	dengue-2	triamcinolone	0.00779008	0.475195	1.02e-05
1395	Newcastle-disease-virus	triamcinolone	0.00779008	0.475195	1.02e-05
1785	Varicella-zoster-virus	trichostatin A	0.00779008	0.475195	1e-07
1894	HPV-16	pyrimethamine	0.00779008	0.475195	1.6e-05
1807	HIV-2	imipramine	0.00779008	0.475195	1.26e-05
3439	Newcastle-disease-virus	merbromin	0.00779008	0.475195	5e-06
1887	BVDV	sulpiride	0.00779008	0.475195	1.18e-05
1887	HIV-2	sulpiride	0.00779008	0.475195	1.18e-05
5908	HCV	trichostatin A	0.00779498	0.475494	1e-06
3175	T.cruzi	cinnarizine	0.00779721	0.47563	1.08e-05
5769	Influenza-A	papaverine	0.00780398	0.476043	1.06e-05
3624	EBV	prilocaine	0.00783102	0.477692	1.56e-05
6549	HSV-2	5155877	0.00783785	0.478109	1e-05
4263	HSV-2	primaquine	0.00798815	0.479289	8.8e-06
6514	Polio	alfaxalone	0.0078597	0.479442	1.2e-05
2807	Vaccinia-virus	quinisocaine	0.00788496	0.480983	1.3e-05
7553	Marburg	CP-863187	0.00788596	0.481043	1e-05
2649	Tularensis	testosterone	0.0078947	0.481577	1.16e-05
4999	HSV-2	bezafibrate	0.0080349	0.482094	1.1e-05
1232	S.aureus-toxin	troglitazone	0.00791586	0.482867	1e-05
3273	RSV	bacampicillin	0.00796529	0.485883	8e-06
1948	Rhinovirus-16	diltiazem	0.00802103	0.489283	8.8e-06
4313	HIV-1	furaltadone	0.00806677	0.492073	1.1e-05
6885	WNV	AH-23848	0.00808332	0.493083	1e-06
390	WNV	tretinoin	0.00808332	0.493083	1e-06
6872	WNV	fulvestrant	0.00809272	0.493656	1e-06
165	Rhinovirus-2	exemestane	0.00810059	0.494136	1e-08
6289	EBV	ganciclovir	0.00810059	0.494136	1.56e-05
2837	EBV	propylthiouracil	0.00810059	0.494136	2.34e-05
7291	Tularensis	lymecycline	0.00811351	0.494924	6.6e-06
2978	Dengue-2	Prestwick-1103	0.00815164	0.49725	1.96e-05
1952	Hendra-virus	baclofen	0.00818495	0.499282	1.88e-05
1952	Nipah-virus	baclofen	0.00818495	0.499282	1.88e-05
6570	WNV	Gly-His-Lys	0.00818592	0.499341	1e-06
3833	Influenza-A	promazine	0.00819688	0.500009	1.24e-05
1716	Newcastle-disease-virus	budesonide	0.00820008	0.500205	9.2e-06
7432	Varicella-zoster-virus	fenofibrate	0.00820008	0.500205	1.1e-05
1974	dengue-2	pyrimethamine	0.00820008	0.500205	1.6e-05
1974	HIV-2	pyrimethamine	0.00820008	0.500205	1.6e-05
1387	BVDV	picotamide	0.00820008	0.500205	1.02e-05
1387	HPV-16	picotamide	0.00820008	0.500205	1.02e-05
3304	Newcastle-disease-virus	ergocalciferol	0.00820008	0.500205	1e-05
2540	Ebola	podophyllotoxin	0.00834392	0.500635	9.6e-06
1533	Rhinovirus-16	loperamide	0.00824657	0.503041	7.8e-06
5225	Reovirus	geldanamycin	0.00827661	0.504874	1e-06
2165	C.perfringens-epsilon-toxin	Prestwick-692	0.00831397	0.507152	7.4e-06
6623	HSV-1	harmaline	0.00831397	0.507152	1.4e-05
6637	Polio	meclocycline	0.00831518	0.507226	5.8e-06
6518	WNV	enilconazole	0.00831609	0.507282	1.34e-05
5777	Rhinovirus-16	spiperone	0.00831852	0.50743	1.02e-05
3297	EBV	bisacodyl	0.00832462	0.507802	1.1e-05
3462	Marburg	trichostatin A	0.00832935	0.50809	1e-07
6290	Tularensis	zoxazolamine	0.00833511	0.508442	2.38e-05
1047	Reovirus	valproic acid	0.00834531	0.509064	0.001
5501	Vaccinia-virus	perhexiline	0.00836059	0.509996	1.02e-05
5990	WNV	thalidomide	0.00836848	0.510477	1.54e-05
2803	Vaccinia-virus	yohimbic acid	0.00837046	0.510598	1.12e-05
3464	Tularensis	cicloheximide	0.0083914	0.511875	1.42e-05
3526	Measles	tridihexethyl	0.00841385	0.513245	1.14e-05
4219	EBV	scopolamine	0.00841694	0.513433	1.18e-05
6210	Rhinovirus-16	disulfiram	0.00856596	0.513957	1.34e-05
6165	Borna-disease-virus	fulvestrant	0.00842601	0.513987	1e-06
6270	RSV	ondansetron	0.00846807	0.516552	1.22e-05
3351	Metapneumovirus	(+/-)-catechin	0.00861009	0.516605	1.38e-05
5730	WNV	etanidazole	0.00847323	0.516867	1.86e-05
4452	Cowpox	geldanamycin	0.00849218	0.518023	1e-06
7068	C.perfringens-epsilon-toxin	MG-262	0.00849652	0.518288	1e-07
6082	Influenza-A	tetrandrine	0.00864911	0.518947	6.4e-06
6177	Marburg	tanespimycin	0.00852527	0.520041	1e-06
2166	C.parvum	succinylsulfathiazole	0.00853989	0.520933	1.12e-05
2516	C.perfringens-epsilon-toxin	trioxysalen	0.00854446	0.521212	1.76e-05
4797	WNV	hydroxyachillin	0.00855068	0.521592	1.42e-05
4776	Influenza-A	norcyclobenzaprine	0.00855536	0.521877	1.54e-05
6547	WNV	dinoprostone	0.0085642	0.522416	1e-05
4781	Cowpox	benperidol	0.00902954	0.523713	1.04e-05
1138	EBV	phentolamine	0.00858891	0.523924	1.15e-05
1571	EBV	alprenolol	0.00858891	0.523924	1.4e-05
3078	HIV-1	urapidil	0.00858902	0.52393	9.4e-06
2684	Rhinovirus-16	trifluoperazine	0.00859892	0.524534	1e-05
2127	dengue-2	pentoxifylline	0.00861009	0.525215	1.44e-05
3460	Metapneumovirus	pipenzolate bromide	0.00861009	0.525215	9.2e-06
1491	Varicella-zoster-virus	amylocaine	0.00861009	0.525215	1.48e-05
1700	Varicella-zoster-virus	chlorpromazine	0.00861009	0.525215	1.12e-05
7421	Varicella-zoster-virus	aminoglutethimide	0.00861009	0.525215	1.72e-05
1380	BK-virus	spironolactone	0.00861009	0.525215	9.6e-06
3463	Metapneumovirus	cinoxacin	0.00861009	0.525215	1.52e-05
4020	SARS	canadine	0.00862758	0.526282	1.18e-05
3742	Influenza-A	etiocholanolone	0.00863778	0.526904	1.38e-05
2925	Vaccinia-virus	Prestwick-967	0.00865598	0.528015	2.58e-05
6474	WNV	prasterone	0.00867962	0.529457	1.22e-05
1373	Cowpox	clindamycin	0.00886798	0.532079	8.6e-06
7509	RSV	16-phenyltetranorprostaglandin E2	0.00873205	0.532655	1e-05
3704	RSV	monensin	0.00873402	0.532775	5.8e-06
1579	Polio	tremorine	0.00888544	0.533126	1.5e-05
1055	HSV-2	chlorpromazine	0.00888763	0.533258	1e-06
2505	HIV-1	ricinine	0.00889784	0.53387	2.44e-05
1770	Borna-disease-virus	lobeline	0.00875524	0.53407	1.06e-05
3379	Rhinovirus-16	luteolin	0.0087624	0.534506	1.4e-05
3641	RSV	finasteride	0.00876548	0.534694	1.08e-05
6948	WNV	15-delta prostaglandin J2	0.00877902	0.53552	1e-05
2299	Salmonella	kawain	0.00879465	0.536474	1.74e-05
141	HIV-1	chlorpropamide	0.00879985	0.536791	0.0001
3583	Influenza-A	propoxycaine	0.00882524	0.53834	1.2e-05
3348	RSV	azacitidine	0.00898837	0.539302	1.64e-05
5052	Borna-disease-virus	allantoin	0.00886112	0.540528	2.52e-05
4816	Rhinovirus-16	salsolinol	0.00886358	0.540679	1.54e-05
1057	dengue-2	monorden	0.00902009	0.541205	1e-07
1057	HIV-2	monorden	0.00902009	0.541205	1e-07
6086	Ebola	cefmetazole	0.00887992	0.541675	8.2e-06
6823	C.perfringens-epsilon-toxin	terfenadine	0.00888763	0.542146	8.4e-06
2998	Marburg	trichlormethiazide	0.00891994	0.544116	1.06e-05
7101	WNV	6-bromoindirubin-3'-oxime	0.00898192	0.547897	5e-07
7507	EBV	daunorubicin	0.00898586	0.548137	1e-06
4786	HSV-2	atovaquone	0.00899443	0.54866	1.1e-05
1558	Hendra-virus	cinnarizine	0.00900159	0.549097	1.08e-05
1558	Nipah-virus	cinnarizine	0.00900159	0.549097	1.08e-05
1238	Hendra-virus	fulvestrant	0.00900159	0.549097	1e-08
1238	Nipah-virus	fulvestrant	0.00900159	0.549097	1e-08
1211	C.jejuni	tretinoin	0.00900159	0.549097	1e-06
1211	Group-B-streptococcus	tretinoin	0.00900159	0.549097	1e-06
3399	Influenza-A	diloxanide	0.00901267	0.549773	1.22e-05
5364	HSV-2	anisomycin	0.009166	0.54996	1.5e-05
2128	Cowpox	meclofenamic acid	0.00917008	0.550205	1.18e-05
1307	Newcastle-disease-virus	corticosterone	0.00902009	0.550225	1.16e-05
1603	BK-virus	sulfafurazole	0.00902009	0.550225	1.5e-05
1603	HIV-2	sulfafurazole	0.00902009	0.550225	1.5e-05
3389	Varicella-zoster-virus	bemegride	0.00902009	0.550225	2.58e-05
1782	BK-virus	racecadotril	0.00902009	0.550225	1.04e-05
1871	dengue-2	diphenhydramine	0.00902009	0.550225	1.38e-05
6983	Metapneumovirus	nordihydroguaiaretic acid	0.00902009	0.550225	1e-06
7345	Varicella-zoster-virus	alcuronium chloride	0.00902009	0.550225	5.4e-06
1824	HIV-2	atracurium besilate	0.00902009	0.550225	3.2e-06
1890	BK-virus	amiloride	0.00902009	0.550225	1.32e-05
6679	Borna-disease-virus	diloxanide	0.0090369	0.551251	1.22e-05
6833	EBV	(-)-isoprenaline	0.00907475	0.55356	1.62e-05
6827	EBV	hydrocotarnine	0.00907475	0.55356	1.32e-05
7193	EBV	streptozocin	0.00907475	0.55356	1.5e-05
4506	Rhinovirus-2	oxyphenbutazone	0.00907475	0.55356	1.24e-05
2148	EBV	boldine	0.00907475	0.55356	1.22e-05
3266	Dengue-2	Chicago Sky Blue 6B	0.00908175	0.553987	4e-06
4524	RSV	levcycloserine	0.00911079	0.555758	3.92e-05
3045	Ebola	hymecromone	0.00912421	0.556577	2.28e-05
2786	HCV	corynanthine	0.00928059	0.556835	1.02e-05
6221	RSV	calycanthine	0.00945469	0.557827	1.16e-05
1565	RSV	etacrynic acid	0.00915913	0.558707	1.32e-05
283	Influenza-A	quercetin	0.00916694	0.559183	1e-06
4102	RSV	tenoxicam	0.00932286	0.559372	1.18e-05
6217	Cowpox	cytisine	0.00917008	0.559375	2.1e-05
3771	S.aureus-toxin	lanatoside C	0.00917995	0.559977	4e-06
7247	HSV-2	artemisinin	0.00920745	0.561654	1.42e-05
832	HSV-2	Y-27632	0.00920745	0.561654	3e-06
1548	HBV	tretinoin	0.00952717	0.562103	1.34e-05
6945	HSV-2	LY-294002	0.00922442	0.56269	1e-05
2084	Hendra-virus	trichostatin A	0.0092478	0.564116	1e-07
2084	Nipah-virus	trichostatin A	0.0092478	0.564116	1e-07
5428	Polio	nabumetone	0.00927247	0.565621	1.76e-05
1414	dengue-2	antimycin A	0.00943009	0.565806	7.2e-06
2064	HSV-2	spironolactone	0.00931101	0.567972	9.6e-06
4997	Dengue-2	velnacrine	0.00932395	0.568761	1.22e-05
977	C.difficile-toxin	wortmannin	0.00934226	0.569878	1e-06
7100	RSV	thapsigargin	0.00952148	0.571289	1e-07
7308	Influenza-A	ethosuximide	0.00936743	0.571413	2.84e-05
2806	EBV	harman	0.0094108	0.574059	1.82e-05
5264	Hantaan-virus	pentetic acid	0.00943009	0.575236	1.02e-05
1981	BK-virus	ethambutol	0.00943009	0.575236	1.44e-05
1145	RSV	acetylsalicylic acid	0.00945469	0.576736	0.0001
1338	RSV	buflomedil	0.00945469	0.576736	1.16e-05
6583	HSV-2	STOCK1N-35874	0.00946433	0.577324	1.4e-05
3994	Influenza-A	Prestwick-864	0.00948221	0.578415	3.5e-05
2896	Tularensis	mometasone	0.00948488	0.578577	7.6e-06
6724	Rhinovirus-16	digoxin	0.00949247	0.579041	5.2e-06
2007	Reovirus	bromocriptine	0.00950849	0.580018	5.4e-06
6210	HSV-2	disulfiram	0.00985693	0.581559	1.34e-05
4591	Vaccinia-virus	diphemanil metilsulfate	0.00953454	0.581607	1.02e-05
920	Vaccinia-virus	decitabine	0.00953454	0.581607	1e-07
1903	HSV-2	oxetacaine	0.00955538	0.582878	8.6e-06
2404	HSV-2	bupivacaine	0.00956637	0.583548	1.24e-05
4182	C.parvum	tenoxicam	0.00958047	0.584409	1.18e-05
3679	Influenza-A	fludroxycortide	0.00990996	0.584688	9.2e-06
2432	HCV	neostigmine bromide	0.00959497	0.585293	1.32e-05
1154	Borna-disease-virus	alvespimycin	0.0097626	0.585756	1e-07
5364	C.perfringens-epsilon-toxin	anisomycin	0.00993401	0.586107	1.5e-05
6735	C.parvum	neostigmine bromide	0.00964716	0.588477	1.32e-05
5729	HIV-1	disulfiram	0.00970932	0.592269	1.34e-05
261	Rhinovirus-16	ciclosporin	0.0097142	0.592566	1e-06
3763	Borna-disease-virus	piperacillin	0.00973848	0.594048	7.4e-06
6700	EBV	ciprofloxacin	0.00975247	0.594901	1.08e-05
7485	Borna-disease-virus	clemastine	0.0097626	0.595518	8.6e-06
6706	HSV-2	cisapride	0.0097738	0.596202	8.6e-06
3890	Polio	beta-escin	0.00977452	0.596246	3.2e-06
5418	Polio	coralyne	0.00977452	0.596246	9.6e-06
1783	RSV	epivincamine	0.0102846	0.596507	1.12e-05
425	HCV	staurosporine	0.00978724	0.597022	1e-08
4822	HCV	seneciphylline	0.00978761	0.597044	1.2e-05
7411	Marburg	lincomycin	0.00981189	0.598526	9e-06
1771	Hendra-virus	calycanthine	0.0098179	0.598892	1.16e-05
1771	Nipah-virus	calycanthine	0.0098179	0.598892	1.16e-05
4784	Reovirus	molindone	0.00983607	0.600001	1.28e-05
1676	dengue-2	morantel	0.0098401	0.600246	1.08e-05
631	Ricin	benserazide	0.0098401	0.600246	1e-05
2001	BVDV	tolnaftate	0.0098401	0.600246	1.3e-05
7030	Metapneumovirus	laudanosine	0.0098401	0.600246	1.12e-05
3374	Hantaan-virus	aminophylline	0.0098401	0.600246	9.6e-06
2931	Varicella-zoster-virus	tocainide	0.0098401	0.600246	1.74e-05
3483	Metapneumovirus	bucladesine	0.0098401	0.600246	7.8e-06
1634	Varicella-zoster-virus	valproic acid	0.0098401	0.600246	0.001
3115	Varicella-zoster-virus	proxyphylline	0.0098401	0.600246	1.68e-05
7185	Varicella-zoster-virus	ticarcillin	0.0098401	0.600246	9.4e-06
6920	HSV-2	AG-012559	0.0100043	0.60026	1e-05
1773	HSV-1	1,4-chrysenequinone	0.00984829	0.600746	1.54e-05
6475	HCV	prazosin	0.00984958	0.600825	9.6e-06
3794	HIV-1	oxaprozin	0.00985627	0.601232	1.36e-05
5026	HSV-2	ouabain	0.0100577	0.603459	5.4e-06
4629	Influenza-A	droperidol	0.00990996	0.604508	1.06e-05
1154	Coxsackievirus	alvespimycin	0.0102501	0.604756	1e-07
1154	Duck-HBV	alvespimycin	0.0102501	0.604756	1e-07
1154	HIV-2	alvespimycin	0.0102501	0.604756	1e-07
6918	HSV-2	fulvestrant	0.00991722	0.60495	1e-06
5983	HSV-2	ozagrel	0.00992113	0.605189	1.52e-05
579	EBV	fisetin	0.0100972	0.605832	5e-05
4337	Dengue-2	proglumide	0.0099463	0.606724	1.2e-05
4173	Tularensis	carbenoxolone	0.00996412	0.607811	6.6e-06
4507	Tularensis	ampyrone	0.00996412	0.607811	1.96e-05
5917	C.parvum	PF-00562151-00	0.00998545	0.609112	1e-05
5515	WNV	bufexamac	0.0103317	0.609573	1.8e-05
2818	Influenza-A	canadine	0.00999787	0.60987	1.18e-05
1164	Influenza-A	nordihydroguaiaretic acid	0.00999787	0.60987	1e-06
2067	Influenza-A	ursolic acid	0.00999787	0.60987	8.8e-06
4578	EBV	apigenin	0.0100247	0.611504	1.48e-05
5104	Vaccinia-virus	flumequine	0.0100385	0.612346	1.54e-05
5419	Rhinovirus-16	methotrexate	0.0100611	0.613727	8.8e-06
1872	HCV	adiphenine	0.010086	0.615244	1.14e-05
7274	WNV	thiamphenicol	0.0100875	0.615336	1.12e-05
6247	Rhinovirus-2	fluorometholone	0.0100997	0.616084	1.06e-05
3889	EBV	2,6-dimethylpiperidine	0.0100997	0.616084	2.68e-05
3369	EBV	rolitetracycline	0.0100997	0.616084	7.6e-06
6124	Borna-disease-virus	cyproterone	0.0101011	0.616165	9.6e-06
2707	Borna-disease-virus	proadifen	0.0101011	0.616165	1.02e-05
7332	HCV	sitosterol	0.0101409	0.618596	9.6e-06
3718	Vaccinia-virus	sulfamerazine	0.0101424	0.618686	1.52e-05
5620	C.difficile-toxin	equilin	0.0101526	0.619311	1.5e-05
2451	HCV	metixene	0.0102107	0.622856	1.16e-05
5487	HIV-1	metformin	0.0102123	0.622952	2.42e-05
4304	EBV	mepenzolate bromide	0.0102467	0.625047	9.6e-06
2959	Newcastle-disease-virus	moracizine	0.0102501	0.625256	8.6e-06
5028	N.gonorrhoeae	lisuride	0.0102501	0.625256	1.18e-05
7442	Varicella-zoster-virus	acemetacin	0.0102501	0.625256	9.6e-06
1544	Hantaan-virus	guanabenz	0.0102501	0.625256	1.38e-05
1269	BVDV	clomifene	0.0102501	0.625256	6.6e-06
4759	Newcastle-disease-virus	myosmine	0.0102501	0.625256	2.74e-05
7463	Newcastle-disease-virus	aminoglutethimide	0.0102501	0.625256	1.72e-05
5401	HSV-1	dextromethorphan	0.0102504	0.625277	1.08e-05
5641	HSV-1	3-hydroxy-DL-kynurenine	0.0102504	0.625277	1.78e-05
6587	Measles	AG-028671	0.0102599	0.625853	1e-05
2173	Polio	promazine	0.0102923	0.627832	1.24e-05
1273	Polio	cefalexin	0.0102923	0.627832	1.1e-05
3047	HCV	nizatidine	0.0103335	0.630341	1.2e-05
2850	HIV-1	nifuroxazide	0.0103856	0.633522	1.46e-05
425	Ebola	staurosporine	0.0105599	0.633595	1e-08
2439	Influenza-A	menadione	0.0107644	0.635101	2.32e-05
3446	Rhinovirus-16	proadifen	0.0104132	0.635204	1.02e-05
4956	Influenza-A	betahistine	0.0104347	0.636519	1.72e-05
6906	HSV-2	STOCK1N-28457	0.0106178	0.637068	2e-05
1416	Ebola	chlorzoxazone	0.0104451	0.637154	2.36e-05
4539	EBV	flutamide	0.0104526	0.637608	1.44e-05
4351	EBV	quinethazone	0.0104526	0.637608	1.38e-05
5875	Tularensis	gabapentin	0.0104543	0.637714	2.34e-05
4810	EBV	salsolidin	0.0106324	0.637943	1.64e-05
1393	HBV	nocodazole	0.0105251	0.642033	1.32e-05
5566	C.parvum	tanespimycin	0.0105379	0.642811	1e-06
3704	Influenza-A	monensin	0.0107144	0.642861	5.8e-06
3710	RSV	cloperastine	0.0105525	0.643704	1.1e-05
2517	C.difficile-toxin	cefalotin	0.0107302	0.643814	9.6e-06
2535	RSV	streptozocin	0.0105739	0.64501	1.5e-05
5701	HCV	domperidone	0.0105837	0.645604	7.4e-06
4321	WNV	ethoxyquin	0.0106056	0.646942	1.84e-05
3784	HCV	vincamine	0.010611	0.64727	1.12e-05
4073	Vaccinia-virus	sitosterol	0.0106261	0.648191	9.6e-06
2027	Hendra-virus	moroxydine	0.0106339	0.648666	1.92e-05
2027	Nipah-virus	moroxydine	0.0106339	0.648666	1.92e-05
952	Influenza-A	carbamazepine	0.0106474	0.649492	1e-07
1207	HSV-1	sirolimus	0.0106599	0.650256	1e-07
4123	Metapneumovirus	suprofen	0.0106601	0.650267	1.54e-05
1547	dengue-2	albendazole	0.0106601	0.650267	1.5e-05
2780	Metapneumovirus	isocorydine	0.0106601	0.650267	1.18e-05
1664	Metapneumovirus	LY-294002	0.0106601	0.650267	1e-05
3456	Varicella-zoster-virus	pridinol	0.0106601	0.650267	1.02e-05
6258	Varicella-zoster-virus	lobeline	0.0106601	0.650267	1.06e-05
5272	Varicella-zoster-virus	methyldopa	0.0106601	0.650267	1.9e-05
7448	Newcastle-disease-virus	bacitracin	0.0106601	0.650267	2.8e-06
1294	BVDV	hesperidin	0.0106601	0.650267	6.6e-06
2113	BVDV	gemfibrozil	0.0106601	0.650267	1.6e-05
3466	Hantaan-virus	carbinoxamine	0.0106601	0.650267	9.8e-06
2214	Coronavirus-NL63	diazoxide	0.0106601	0.650267	1.74e-05
7358	Varicella-zoster-virus	alprostadil	0.0106601	0.650267	1.12e-05
1892	BK-virus	levodopa	0.0106601	0.650267	2.02e-05
1892	BVDV	levodopa	0.0106601	0.650267	2.02e-05
1892	HIV-2	levodopa	0.0106601	0.650267	2.02e-05
1733	C.parvum	sulfasalazine	0.0110338	0.650995	1e-05
1733	Measles	sulfasalazine	0.0110338	0.650995	1e-05
1733	Salmonella	sulfasalazine	0.0110338	0.650995	1e-05
3273	HSV-2	bacampicillin	0.0108587	0.651522	8e-06
3750	HSV-2	eldeline	0.010683	0.651661	7.8e-06
5068	Influenza-A	metformin	0.0106842	0.651736	2.42e-05
5792	HSV-2	butamben	0.0106855	0.651818	2.06e-05
2823	HSV-2	thiostrepton	0.0107217	0.654024	2.4e-06
3687	Dengue-2	glycopyrronium bromide	0.0107353	0.654855	1e-05
1418	Dengue-2	pargyline	0.0107353	0.654855	2.04e-05
908	WNV	5140203	0.0107377	0.654997	1.5e-05
6051	Marburg	lycorine	0.0109187	0.655122	1.24e-05
865	Reovirus	quinostatin	0.0107514	0.655833	1e-05
6160	Influenza-A	oxyphenbutazone	0.0107596	0.656336	1.24e-05
4643	RSV	iohexol	0.0107634	0.656566	4.8e-06
954	C.difficile-toxin	blebbistatin	0.0107672	0.656802	1.7e-05
3362	Influenza-A	iodixanol	0.0107801	0.657588	2.6e-06
5058	HSV-2	homatropine	0.0107981	0.658686	1.12e-05
2800	EBV	protoveratrine A	0.010811	0.65947	5e-06
6975	Rhinovirus-2	prochlorperazine	0.010811	0.65947	1e-05
6875	Influenza-A	0175029-0000	0.0108229	0.660199	1e-05
5792	Borna-disease-virus	butamben	0.0110051	0.660309	2.06e-05
4361	Salmonella	flutamide	0.0113931	0.660802	1.44e-05
2119	Influenza-A	hydrastinine	0.0108401	0.661244	1.64e-05
6035	Borna-disease-virus	heliotrine	0.01085	0.661848	1.28e-05
1944	Measles	moroxydine	0.0110338	0.662029	1.92e-05
3434	HSV-2	alpha-ergocryptine	0.0108587	0.662381	7e-06
7100	Rhinovirus-16	thapsigargin	0.0112517	0.66385	1e-07
4463	EBV	LY-294002	0.0112564	0.66413	1e-05
1063	dengue-2	tanespimycin	0.0110701	0.664207	1e-06
1063	HIV-2	tanespimycin	0.0110701	0.664207	1e-06
7094	Rhinovirus-16	lomustine	0.0108939	0.664528	0.0001
1520	RSV	azacyclonol	0.011094	0.665641	1.5e-05
3906	EBV	CP-690334-01	0.0109134	0.665719	1e-05
2392	Influenza-A	dyclonine	0.0109409	0.667397	1.22e-05
3840	Influenza-A	bendroflumethiazide	0.0109756	0.66951	9.4e-06
122	HSV-2	alpha-estradiol	0.0109813	0.66986	1e-08
3063	Ebola	2-aminobenzenesulfonamide	0.0111736	0.670416	2.32e-05
2857	EBV	mycophenolic acid	0.0111749	0.670493	1.24e-05
7154	Cowpox	vinburnine	0.0111793	0.67076	1.36e-05
7559	HSV-2	BCB000040	0.0110113	0.671692	1e-05
4199	HIV-1	molindone	0.0110321	0.672956	1.28e-05
1002	C.parvum	valproic acid	0.0110338	0.673063	5e-05
2739	Ebola	iopromide	0.0112386	0.674318	5e-06
1674	Polio	procaine	0.0110569	0.674473	1.46e-05
6972	RSV	trichostatin A	0.011252	0.675119	1e-07
1746	Newcastle-disease-virus	mometasone	0.0110701	0.675277	7.6e-06
911	Metapneumovirus	wortmannin	0.0110701	0.675277	1e-08
5240	Hantaan-virus	wortmannin	0.0110701	0.675277	1e-08
6778	Hantaan-virus	acetylsalicylsalicylic acid	0.0110701	0.675277	1.34e-05
4407	Metapneumovirus	terconazole	0.0110701	0.675277	7.6e-06
1463	Metapneumovirus	sulfathiazole	0.0110701	0.675277	1.56e-05
4698	Hantaan-virus	mephenesin	0.0110701	0.675277	2.2e-05
3309	Hantaan-virus	ceforanide	0.0110701	0.675277	7.6e-06
6029	Reovirus	famprofazone	0.0110733	0.675472	1.06e-05
3669	Ebola	metaraminol	0.0110754	0.6756	8.6e-06
3572	C.perfringens-epsilon-toxin	ramipril	0.0110767	0.675681	9.6e-06
6472	C.perfringens-epsilon-toxin	flurbiprofen	0.0110767	0.675681	1.64e-05
5266	Marburg	clenbuterol	0.0110928	0.676663	1.28e-05
7186	HSV-2	cefotaxime	0.011093	0.676671	8.4e-06
2109	HSV-2	ornidazole	0.011093	0.676671	1.82e-05
5213	Newcastle-disease-virus	LY-294002	0.0114801	0.677327	1e-07
222	C.perfringens-epsilon-toxin	tomelukast	0.0111223	0.678458	1e-06
5919	RSV	tanespimycin	0.0111646	0.68104	1e-06
2746	Polio	tomatidine	0.0111665	0.681158	9.6e-06
3168	RSV	oxybutynin	0.0111707	0.681412	1.02e-05
5588	Ebola	geldanamycin	0.0111736	0.681589	1e-06
2785	EBV	rescinnamine	0.0111749	0.681668	6.4e-06
4141	EBV	metronidazole	0.0111749	0.681668	2.34e-05
6466	EBV	bephenium hydroxynaphthoate	0.0111749	0.681668	9e-06
7218	Influenza-A	abamectin	0.0111803	0.681995	4.8e-06
486	HSV-2	calmidazolium	0.0111953	0.682914	5e-06
5679	Dengue-2	Prestwick-860	0.0111968	0.683003	3.5e-05
6863	Tularensis	PF-00562151-00	0.0112101	0.683814	1e-05
3769	HCV	sulfachlorpyridazine	0.0112137	0.684037	1.4e-05
4179	HSV-2	alprostadil	0.0112295	0.685001	1.12e-05
4278	Borna-disease-virus	bromopride	0.0112364	0.685419	1.16e-05
6764	Ebola	anisomycin	0.0112376	0.685491	1.5e-05
6835	EBV	clobetasol	0.0114304	0.685822	8.6e-06
1079	Dengue-2	estradiol	0.0112484	0.686151	1e-08
7137	Hendra-virus	methylprednisolone	0.0114495	0.68697	1.06e-05
7137	Nipah-virus	methylprednisolone	0.0114495	0.68697	1.06e-05
1312	Hendra-virus	levothyroxine sodium	0.0114495	0.68697	5.2e-06
1312	Nipah-virus	levothyroxine sodium	0.0114495	0.68697	5.2e-06
6179	Tularensis	vorinostat	0.0112636	0.687082	1e-05
3449	Varicella-zoster-virus	sulfanilamide	0.0114801	0.688807	2.32e-05
3526	HSV-2	tridihexethyl	0.0114855	0.689128	1.14e-05
4091	C.perfringens-epsilon-toxin	tiaprofenic acid	0.0113223	0.690659	1.54e-05
2195	Tularensis	lycorine	0.01134	0.691738	1.24e-05
4986	Reovirus	methyldopate	0.0113636	0.693181	1.46e-05
2878	Reovirus	iobenguane	0.0113636	0.693181	1.08e-05
3230	Polio	brinzolamide	0.0113756	0.693912	1.04e-05
6364	HSV-2	erastin	0.0115727	0.694363	2e-05
3275	RSV	digitoxigenin	0.0113923	0.694932	1.06e-05
256	C.parvum	rofecoxib	0.0113931	0.694981	1e-05
2275	HCV	nimesulide	0.0114047	0.695684	1.3e-05
2847	Vaccinia-virus	rifampicin	0.0114089	0.695945	4.8e-06
1995	EBV	sulfaguanidine	0.0114378	0.697705	1.86e-05
1806	H.pylori	homatropine	0.0114495	0.69842	1.12e-05
6965	Influenza-A	fulvestrant	0.0114579	0.698932	1e-06
7526	Influenza-A	15(S)-15-methylprostaglandin E2	0.0114628	0.69923	1e-05
2628	Tularensis	cefalexin	0.0114674	0.699511	1.1e-05
5006	Varicella-zoster-virus	hydroxyzine	0.0114801	0.700287	9e-06
1730	dengue-2	etamivan	0.0114801	0.700287	1.8e-05
1730	HIV-2	etamivan	0.0114801	0.700287	1.8e-05
1925	BK-virus	bromocriptine	0.0114801	0.700287	5.4e-06
3451	Varicella-zoster-virus	isoetarine	0.0114801	0.700287	1.2e-05
1426	BK-virus	alverine	0.0114801	0.700287	8.4e-06
6279	dengue-2	ifosfamide	0.0114801	0.700287	1.54e-05
4109	HSV-2	amiloride	0.0114855	0.700613	1.32e-05
5686	Borna-disease-virus	kanamycin	0.0115242	0.702975	6.8e-06
1172	Tularensis	15-delta prostaglandin J2	0.0117274	0.703644	1e-05
4602	RSV	procainamide	0.0115397	0.703919	1.48e-05
7320	EBV	harmol	0.0115443	0.704202	1.58e-05
6284	EBV	paracetamol	0.0115443	0.704202	2.64e-05
6767	EBV	Prestwick-1084	0.0115443	0.704202	1.62e-05
3240	Vaccinia-virus	vanoxerine	0.0115451	0.704254	7.6e-06
409	S.aureus-toxin	valproic acid	0.0115739	0.706011	0.001
2268	HBV	trichostatin A	0.0116131	0.708402	1e-07
5785	Borna-disease-virus	dorzolamide	0.0116308	0.70948	1.1e-05
5464	Borna-disease-virus	adrenosterone	0.0116308	0.70948	1.34e-05
3577	Marburg	benzylpenicillin	0.0116674	0.711711	1.12e-05
1602	Influenza-A	phenylpropanolamine	0.0116701	0.711873	2.14e-05
6639	Rhinovirus-16	lasalocid	0.0116751	0.712184	6.6e-06
3932	Rhinovirus-16	furaltadone	0.0116751	0.712184	1.1e-05
3562	Salmonella	cycloserine	0.0116853	0.712803	3.92e-05
2846	dengue-2	trimethadione	0.0118901	0.713407	2.8e-05
2801	Rhinovirus-16	emetine	0.0117198	0.71491	7.2e-06
4071	HCV	co-dergocrine mesilate	0.0117571	0.717182	6.4e-06
2495	Rhinovirus-16	ethionamide	0.0117698	0.717957	2.4e-05
1291	Rhinovirus-16	benzbromarone	0.0117698	0.717957	9.4e-06
2554	Reovirus	furaltadone	0.0117754	0.718296	1.1e-05
1273	HSV-2	cefalexin	0.0119775	0.718652	1.1e-05
1677	Dengue-2	todralazine	0.0117897	0.71917	1.48e-05
4773	HSV-2	spectinomycin	0.0117982	0.719691	9.8e-06
668	KSHV	monastrol	0.011802	0.719923	0.0001
2957	Polio	pyrvinium	0.0120273	0.721635	3.4e-06
2042	Ebola	chlortetracycline	0.0118681	0.723955	7.8e-06
3764	Influenza-A	ethoxyquin	0.011875	0.724377	1.84e-05
1957	HCV	methotrexate	0.0118788	0.724604	8.8e-06
3391	Metapneumovirus	monobenzone	0.0118901	0.725297	2e-05
4987	Metapneumovirus	khellin	0.0118901	0.725297	1.54e-05
3422	Metapneumovirus	sulfadimidine	0.0118901	0.725297	1.34e-05
1767	BK-virus	riboflavin	0.0118901	0.725297	1.06e-05
3811	EBV	pramocaine	0.0119192	0.72707	1.22e-05
6302	EBV	chlorhexidine	0.0119192	0.72707	8e-06
6320	EBV	nimodipine	0.0119192	0.72707	9.6e-06
5839	EBV	kaempferol	0.0119192	0.72707	1.4e-05
6071	EBV	fluorometholone	0.0119192	0.72707	1.06e-05
2951	Marburg	piribedil	0.0119286	0.727647	1.2e-05
6749	Polio	zaprinast	0.0119413	0.728418	1.48e-05
7541	Tularensis	16-phenyltetranorprostaglandin E2	0.0119901	0.731397	1e-05
3039	Borna-disease-virus	equilin	0.0120333	0.734032	1.5e-05
2540	Borna-disease-virus	podophyllotoxin	0.0124519	0.734664	9.6e-06
1049	Metapneumovirus	tretinoin	0.0123001	0.738007	1e-06
6578	WNV	PHA-00665752	0.0123317	0.7399	1e-05
6902	Rhinovirus-16	0297417-0002B	0.0121321	0.740056	1e-05
6946	C.perfringens-epsilon-toxin	geldanamycin	0.012144	0.740783	1e-06
6553	Polio	5194442	0.0121458	0.740894	2e-05
7389	Borna-disease-virus	0173570-0000	0.0121706	0.742404	1e-05
1302	Influenza-A	ouabain	0.0121843	0.743243	5.4e-06
6711	C.perfringens-epsilon-toxin	puromycin	0.0121951	0.743902	7.4e-06
3223	Influenza-A	probucol	0.0122309	0.746087	7.8e-06
4132	Influenza-A	sisomicin	0.0122309	0.746087	2.8e-06
2000	RSV	tolazoline	0.0122347	0.746317	2.04e-05
4004	Marburg	boldine	0.0122376	0.746492	1.22e-05
5351	C.parvum	ceforanide	0.0122548	0.747541	7.6e-06
4008	Influenza-A	rifampicin	0.0122636	0.748077	4.8e-06
5755	Influenza-A	racecadotril	0.0122636	0.748077	1.04e-05
1514	Hendra-virus	metolazone	0.0122648	0.748153	1.1e-05
1514	Nipah-virus	metolazone	0.0122648	0.748153	1.1e-05
1282	Echovirus-1	buspirone	0.0122648	0.748153	9.4e-06
2052	Echovirus-1	diazoxide	0.0122648	0.748153	1.74e-05
3684	Dengue-2	isocarboxazid	0.0122811	0.749148	1.72e-05
3257	Influenza-A	apigenin	0.0122823	0.749222	1.48e-05
2637	C.difficile-toxin	buspirone	0.0122983	0.750193	9.4e-06
3386	EBV	propofol	0.0122995	0.75027	2.24e-05
6688	EBV	debrisoquine	0.0122995	0.75027	9e-06
4462	EBV	fulvestrant	0.0122995	0.75027	1e-08
6599	Rhinovirus-2	5194442	0.0122995	0.75027	2e-05
2826	EBV	selegiline	0.0122995	0.75027	1.78e-05
3261	Metapneumovirus	lysergol	0.0123001	0.750308	1.58e-05
1489	Hantaan-virus	phenazone	0.0123001	0.750308	2.12e-05
1499	Varicella-zoster-virus	lidocaine	0.0123001	0.750308	1.48e-05
1521	Metapneumovirus	cyproheptadine	0.0123001	0.750308	1.24e-05
2243	Varicella-zoster-virus	tetracycline	0.0123001	0.750308	8.4e-06
1271	BVDV	N6-methyladenosine	0.0123001	0.750308	1.42e-05
7401	Varicella-zoster-virus	calcium folinate	0.0123001	0.750308	7.8e-06
6773	Metapneumovirus	chlorphenamine	0.0123001	0.750308	1.02e-05
3107	HPV-16	adrenosterone	0.0123001	0.750308	1.34e-05
4578	HCV	apigenin	0.0125237	0.751422	1.48e-05
7056	Tularensis	alsterpaullone	0.0125298	0.751788	1e-05
6569	C.difficile-toxin	5155877	0.0123612	0.754034	1e-05
7084	Hendra-virus	MS-275	0.0123963	0.756175	1e-05
7084	Nipah-virus	MS-275	0.0123963	0.756175	1e-05
2373	Rhinovirus-16	flavoxate	0.0124408	0.758886	9.4e-06
1520	Rhinovirus-16	azacyclonol	0.0128669	0.759148	1.5e-05
4566	C.parvum	sulpiride	0.0124464	0.759229	1.18e-05
7487	HCV	semustine	0.0124862	0.761656	0.0001
6573	M.tuberculosis	PNU-0293363	0.0124878	0.761756	1e-05
5640	Marburg	digoxigenin	0.012532	0.764453	1.02e-05
3935	Ebola	eucatropine	0.0125321	0.764456	1.22e-05
2381	Ebola	flunarizine	0.0125321	0.764456	8.4e-06
1942	Ebola	chlorhexidine	0.012546	0.765304	8e-06
4358	RSV	ciclacillin	0.0125506	0.765584	1.18e-05
1778	RSV	berberine	0.0125506	0.765584	1.08e-05
2281	HSV-2	aceclofenac	0.012564	0.766406	1.12e-05
2753	WNV	syrosingopine	0.0127841	0.767047	6e-06
6958	HCV	sirolimus	0.0128208	0.769246	1e-07
6225	Cowpox	butacaine	0.0126178	0.769689	1.3e-05
7177	HSV-2	nalbuphine	0.0126328	0.770599	1.02e-05
2996	Reovirus	piromidic acid	0.0126374	0.770884	1.38e-05
6188	WNV	clozapine	0.0126541	0.7719	1e-05
4600	HIV-1	iocetamic acid	0.0126561	0.772021	6.6e-06
579	WNV	fisetin	0.0131002	0.772911	5e-05
2296	Measles	sulfamethoxazole	0.0128891	0.773343	1.58e-05
2296	Salmonella	sulfamethoxazole	0.0128891	0.773343	1.58e-05
5765	Rhinovirus-2	naltrexone	0.0126853	0.7738	9.6e-06
5995	EBV	epirizole	0.0126853	0.7738	1.7e-05
2643	EBV	flupentixol	0.0126853	0.7738	7.8e-06
3433	EBV	lithocholic acid	0.0126853	0.7738	1.06e-05
2784	EBV	retrorsine	0.0126853	0.7738	1.14e-05
5255	Metapneumovirus	equilin	0.0127101	0.775318	1.5e-05
4760	Metapneumovirus	benzamil	0.0127101	0.775318	1.12e-05
1564	BK-virus	bupropion	0.0127101	0.775318	1.44e-05
1564	BVDV	bupropion	0.0127101	0.775318	1.44e-05
4758	Clostridium-perfringens-toxin	0179445-0000	0.0127101	0.775318	1e-06
5207	Varicella-zoster-virus	alpha-estradiol	0.0127101	0.775318	1e-08
5249	HIV-1	phthalylsulfathiazole	0.0127191	0.775862	1e-05
1870	Vaccinia-virus	acetohexamide	0.0127423	0.777279	1.24e-05
2862	Vaccinia-virus	molsidomine	0.0127423	0.777279	1.66e-05
3167	HIV-1	labetalol	0.01279	0.780189	1.1e-05
5925	Reovirus	pioglitazone	0.013015	0.780899	1e-05
5565	Ebola	fulvestrant	0.0130412	0.782473	1e-06
1388	HSV-1	pirenzepine	0.0130637	0.783823	9.4e-06
7062	C.perfringens-epsilon-toxin	GW-8510	0.0132876	0.783967	1e-05
3308	Hendra-virus	dinoprost	0.0130798	0.784786	8.4e-06
3308	Nipah-virus	dinoprost	0.0130798	0.784786	8.4e-06
2235	HIV-1	cefotaxime	0.0129012	0.786973	8.4e-06
5997	HIV-1	imipenem	0.0129148	0.787804	1.34e-05
2036	C.jejuni	baclofen	0.0131376	0.788257	1.88e-05
2036	Group-B-streptococcus	baclofen	0.0131376	0.788257	1.88e-05
4106	C.difficile-toxin	6-azathymine	0.0129315	0.788821	3.14e-05
6213	Rhinovirus-16	syrosingopine	0.0129357	0.78908	6e-06
4771	HSV-2	probenecid	0.0129369	0.789153	1.4e-05
6400	C.perfringens-epsilon-toxin	AG-013608	0.0130005	0.793032	1e-05
2563	Marburg	mephentermine	0.0130076	0.793461	9.4e-06
5855	WNV	harmine	0.0130143	0.793872	1.6e-05
4235	HSV-2	doxylamine	0.0130185	0.794131	1.02e-05
6585	HIV-1	6-bromoindirubin-3'-oxime	0.013023	0.794402	5e-07
1211	C.parvum	tretinoin	0.0134747	0.795008	1e-06
1211	Measles	tretinoin	0.0134747	0.795008	1e-06
1211	Salmonella	tretinoin	0.0134747	0.795008	1e-06
4319	HCV	spiramycin	0.0130433	0.795643	4.8e-06
4695	HCV	clemizole	0.0130433	0.795643	1.1e-05
7166	C.perfringens-epsilon-toxin	tomatidine	0.013269	0.796138	9.6e-06
2731	Influenza-A	gabapentin	0.0130515	0.796139	2.34e-05
1599	KSHV	methotrexate	0.0130637	0.796887	8.8e-06
5453	EBV	amitriptyline	0.0130764	0.79766	1.28e-05
4446	EBV	valproic acid	0.0130764	0.79766	5e-05
3254	EBV	lumicolchicine	0.0130764	0.79766	1e-05
2459	EBV	nitrofural	0.0130764	0.79766	2.02e-05
1728	Echovirus-1	Prestwick-559	0.0130798	0.797866	8.2e-06
2003	Echovirus-1	metronidazole	0.0130798	0.797866	2.34e-05
3710	Influenza-A	cloperastine	0.0133077	0.798463	1.1e-05
1565	HSV-2	etacrynic acid	0.0133387	0.800324	1.32e-05
3508	Varicella-zoster-virus	risperidone	0.0131201	0.800328	9.8e-06
5279	Metapneumovirus	biperiden	0.0131201	0.800328	1.14e-05
4823	Varicella-zoster-virus	fosfosal	0.0131201	0.800328	1.84e-05
4131	Metapneumovirus	brompheniramine	0.0131201	0.800328	9.2e-06
1888	BK-virus	minaprine	0.0131201	0.800328	1.08e-05
1888	HPV-16	minaprine	0.0131201	0.800328	1.08e-05
2812	Reovirus	hydroxyachillin	0.0138349	0.802426	1.42e-05
2656	Hendra-virus	ouabain	0.0136119	0.8031	5.4e-06
2656	Nipah-virus	ouabain	0.0136119	0.8031	5.4e-06
4151	Reovirus	L-methionine sulfoximine	0.0131676	0.803222	2.22e-05
2556	Vaccinia-virus	eucatropine	0.0131785	0.803889	1.22e-05
5668	Dengue-2	dimethadione	0.0131799	0.803975	3.1e-05
4301	Dengue-2	betonicine	0.0131799	0.803975	2.52e-05
1231	Cowpox	15-delta prostaglandin J2	0.0134162	0.804974	1e-05
6607	Influenza-A	benzthiazide	0.0131991	0.805144	9.2e-06
2130	HSV-2	rescinnamine	0.0132263	0.806803	6.4e-06
1807	Marburg	imipramine	0.0134529	0.807172	1.26e-05
6613	Rhinovirus-16	theobromine	0.0132422	0.807773	2.22e-05
4348	EBV	trichostatin A	0.0134729	0.808375	1e-07
4620	HSV-1	dehydrocholic acid	0.013269	0.809407	9.6e-06
3906	Marburg	CP-690334-01	0.0135034	0.810201	1e-05
1004	Dengue-2	trifluoperazine	0.013287	0.810509	1e-05
7255	dengue-2	moxisylyte	0.0135301	0.811808	1.26e-05
3444	Newcastle-disease-virus	ribostamycin	0.0135301	0.811808	7.2e-06
5857	RSV	isoconazole	0.0133345	0.813406	9.6e-06
5452	RSV	procarbazine	0.0133345	0.813406	1.56e-05
7543	Tularensis	IC-86621	0.0133437	0.813967	1e-06
4294	Tularensis	benzamil	0.0133437	0.813967	1.12e-05
1394	HCV	acenocoumarol	0.0135858	0.815145	1.14e-05
1114	HIV-1	tyrphostin AG-825	0.0138326	0.816122	2.52e-05
7548	RSV	IC-86621	0.0133885	0.8167	1e-06
3310	WNV	puromycin	0.013404	0.817645	7.4e-06
7045	Vaccinia-virus	lomustine	0.0138678	0.818201	0.0001
2652	Cowpox	coralyne	0.0134162	0.81839	9.6e-06
950	Rhinovirus-16	5211181	0.0134162	0.81839	1.2e-05
4651	C.perfringens-epsilon-toxin	cephaeline	0.0136495	0.818967	6e-06
2290	Vaccinia-virus	pentoxifylline	0.0134336	0.81945	1.44e-05
2099	Vaccinia-virus	scopolamine N-oxide	0.0134336	0.81945	1e-05
4587	Vaccinia-virus	tetramisole	0.0134336	0.81945	1.66e-05
5333	Influenza-A	zidovudine	0.0134401	0.819844	1.5e-05
3613	Influenza-A	Prestwick-664	0.01345	0.820448	8.4e-06
2559	RSV	ethoxyquin	0.0134545	0.820726	1.84e-05
7392	EBV	0175029-0000	0.0134729	0.821848	1e-06
4746	EBV	hydralazine	0.0134729	0.821848	2.04e-05
4240	EBV	letrozole	0.0134729	0.821848	1.4e-05
4817	EBV	procyclidine	0.0134729	0.821848	1.24e-05
3851	EBV	helveticoside	0.0134754	0.822	7.4e-06
6737	Dengue-2	ethaverine	0.0134771	0.822104	9.2e-06
2448	Influenza-A	puromycin	0.0134887	0.822812	7.4e-06
5620	WNV	equilin	0.0137314	0.823886	1.5e-05
3327	Hantaan-virus	spectinomycin	0.0135301	0.825338	9.8e-06
1396	Newcastle-disease-virus	dexamethasone	0.0135301	0.825338	9.2e-06
3349	Varicella-zoster-virus	arcaine	0.0135301	0.825338	1.48e-05
3401	Hantaan-virus	xamoterol	0.0135301	0.825338	5e-06
7316	Coronavirus-NL63	ribavirin	0.0135301	0.825338	1.64e-05
1474	Metapneumovirus	pyrimethamine	0.0135301	0.825338	1.6e-05
1532	Varicella-zoster-virus	diltiazem	0.0135301	0.825338	8.8e-06
6777	Newcastle-disease-virus	yohimbine	0.0135301	0.825338	1.02e-05
1467	Varicella-zoster-virus	sulpiride	0.0135301	0.825338	1.18e-05
1516	Varicella-zoster-virus	loxapine	0.0135301	0.825338	9e-06
4013	HIV-1	brompheniramine	0.0137826	0.826955	9.2e-06
6363	Influenza-A	PF-01378883-00	0.0135645	0.827436	1e-05
2378	HBV	fenoterol	0.0135676	0.827623	1.04e-05
2933	HBV	decamethonium bromide	0.0135676	0.827623	9.6e-06
6809	C.difficile-toxin	labetalol	0.0135854	0.828711	1.1e-05
376	Reovirus	raloxifene	0.0136333	0.83163	1e-07
4651	Vaccinia-virus	cephaeline	0.0141318	0.833775	6e-06
7525	Rhinovirus-16	daunorubicin	0.0136893	0.835045	1e-06
4983	HSV-2	daunorubicin	0.0141647	0.835719	7e-06
5273	Metapneumovirus	haloperidol	0.0139401	0.836408	1.06e-05
6941	HPV-16	valproic acid	0.0139401	0.836408	5e-05
3829	Borna-disease-virus	mepenzolate bromide	0.0137245	0.837194	9.6e-06
6438	Influenza-A	5707885	0.0139568	0.837407	5e-05
3986	Influenza-A	fusaric acid	0.0137298	0.837517	2.24e-05
4206	HCV	pepstatin	0.0139595	0.83757	5.8e-06
7367	WNV	nalidixic acid	0.0137749	0.840266	1.46e-05
4073	HIV-1	sitosterol	0.0140088	0.84053	9.6e-06
5058	EBV	homatropine	0.0140374	0.842245	1.12e-05
444	Reovirus	clofibrate	0.013826	0.843389	0.0001
3638	Influenza-A	karakoline	0.0138391	0.844182	1.06e-05
7509	M.tuberculosis	16-phenyltetranorprostaglandin E2	0.0140945	0.845671	1e-05
2532	Vaccinia-virus	alclometasone	0.0138678	0.845936	7.6e-06
2446	HCV	dinoprost	0.013868	0.845948	8.4e-06
2859	EBV	quercetin	0.0138748	0.846362	1.18e-05
3190	C.perfringens-epsilon-toxin	fendiline	0.0138923	0.847429	1.14e-05
1788	Hendra-virus	vinburnine	0.0138944	0.847558	1.36e-05
1788	Nipah-virus	vinburnine	0.0138944	0.847558	1.36e-05
3269	Hendra-virus	mebhydrolin	0.0138944	0.847558	4.8e-06
3269	Nipah-virus	mebhydrolin	0.0138944	0.847558	4.8e-06
7138	Echovirus-1	carbinoxamine	0.0138944	0.847558	9.8e-06
7238	HCV	leflunomide	0.013905	0.848204	1.48e-05
6346	Borna-disease-virus	sulfasalazine	0.0139068	0.848312	1e-05
7169	Vaccinia-virus	benzydamine	0.0141412	0.848471	1.16e-05
2067	HCV	ursolic acid	0.0141427	0.84856	8.8e-06
950	Influenza-A	5211181	0.0141496	0.848979	1.2e-05
7468	Metapneumovirus	pimethixene	0.0139401	0.850348	9.8e-06
3470	Metapneumovirus	securinine	0.0139401	0.850348	1.84e-05
2969	Newcastle-disease-virus	cyclic adenosine monophosphate	0.0139401	0.850348	1.22e-05
4848	HIV-2	iodixanol	0.0139401	0.850348	2.6e-06
3735	Coronavirus-NL63	PNU-0230031	0.0139401	0.850348	1e-06
5011	Clostridium-perfringens-toxin	famotidine	0.0139401	0.850348	1.18e-05
2440	Varicella-zoster-virus	niridazole	0.0139401	0.850348	1.86e-05
5457	Hantaan-virus	naproxen	0.0139401	0.850348	1.74e-05
6261	Varicella-zoster-virus	cefuroxime	0.0139401	0.850348	9e-06
6779	Metapneumovirus	butirosin	0.0139401	0.850348	5.4e-06
6769	Varicella-zoster-virus	tetryzoline	0.0139401	0.850348	1.68e-05
5327	Influenza-A	benfluorex	0.0139558	0.851302	1.04e-05
6797	HCV	aconitine	0.0139814	0.852866	6.2e-06
5078	C.parvum	dapsone	0.0139883	0.853284	1.62e-05
4303	Salmonella	flunisolide	0.0139883	0.853284	9.2e-06
2043	HSV-2	paclitaxel	0.0142449	0.854692	4.6e-06
893	Rhinovirus-16	pararosaniline	0.0140245	0.855492	1e-05
2902	EBV	pronetalol	0.0140374	0.856283	1.5e-05
4340	Reovirus	ethisterone	0.0140529	0.85723	1.28e-05
3414	RSV	fluocinonide	0.0140889	0.859426	8e-06
2887	dengue-2	tubocurarine chloride	0.0143501	0.861009	5.2e-06
2224	Metapneumovirus	nomifensine	0.0143501	0.861009	1.12e-05
3664	Dengue-2	griseofulvin	0.0141214	0.861406	1.12e-05
1171	Polio	thioridazine	0.0143662	0.861969	1e-05
7262	HCV	alfadolone	0.0141427	0.862703	1.02e-05
948	Influenza-A	Y-27632	0.0141496	0.863128	3e-06
1693	Influenza-A	sulindac	0.0141496	0.863128	1.12e-05
2202	Polio	gossypol	0.0141863	0.865364	7.8e-06
6608	HSV-1	nifurtimox	0.0141956	0.865934	1.4e-05
2446	Reovirus	dinoprost	0.014434	0.866043	8.4e-06
3743	HIV-1	diphenylpyraline	0.0142168	0.867223	1.26e-05
4421	Influenza-A	lidocaine	0.0142192	0.867374	1.48e-05
6056	HCV	benzamil	0.0144815	0.868891	1.12e-05
1525	HSV-2	chlorhexidine	0.0142449	0.868937	8e-06
5507	C.difficile-toxin	sulfaphenazole	0.0142603	0.869877	1.28e-05
1552	EBV	benzydamine	0.0142797	0.871059	1.16e-05
5497	EBV	pirlindole	0.014282	0.8712	1.24e-05
4062	EBV	metacycline	0.014282	0.8712	8.4e-06
3843	EBV	flecainide	0.014282	0.8712	8.4e-06
4496	EBV	pindolol	0.014282	0.8712	1.62e-05
1931	Marburg	amoxapine	0.0145269	0.871613	1.28e-05
7427	Metapneumovirus	econazole	0.0143501	0.875359	9e-06
6788	Metapneumovirus	sulfaquinoxaline	0.0143501	0.875359	1.24e-05
6788	Varicella-zoster-virus	sulfaquinoxaline	0.0143501	0.875359	1.24e-05
7006	Hantaan-virus	etodolac	0.0143501	0.875359	1.4e-05
4540	Metapneumovirus	tolbutamide	0.0143501	0.875359	1.48e-05
4540	Varicella-zoster-virus	tolbutamide	0.0143501	0.875359	1.48e-05
1311	BVDV	calcium pantothenate	0.0143501	0.875359	8e-06
3884	Coronavirus-NL63	phenelzine	0.0143501	0.875359	1.7e-05
5278	Metapneumovirus	aciclovir	0.0143501	0.875359	1.78e-05
3335	Varicella-zoster-virus	piromidic acid	0.0143501	0.875359	1.38e-05
4415	Hantaan-virus	etilefrine	0.0143501	0.875359	1.84e-05
4415	N.gonorrhoeae	etilefrine	0.0143501	0.875359	1.84e-05
459	dengue-2	copper sulfate	0.0143501	0.875359	0.0001
459	Metapneumovirus	copper sulfate	0.0143501	0.875359	0.0001
2021	HIV-2	cyproheptadine	0.0143501	0.875359	1.24e-05
4740	Varicella-zoster-virus	sulfamerazine	0.0143501	0.875359	1.52e-05
459	HSV-2	copper sulfate	0.0144495	0.875359	0.0001
4740	HSV-2	sulfamerazine	0.0144495	0.875359	1.52e-05
3976	Influenza-A	vincamine	0.0143591	0.875907	1.12e-05
4482	Polio	cefalotin	0.0143662	0.876335	9.6e-06
6678	Polio	etynodiol	0.0143662	0.876335	1.04e-05
2456	Influenza-A	ciclopirox	0.0146127	0.876762	1.5e-05
611	HBV	geldanamycin	0.0143937	0.878014	1e-06
5701	EBV	domperidone	0.0146385	0.878307	7.4e-06
1948	HSV-2	diltiazem	0.014641	0.87846	8.8e-06
6716	Rhinovirus-16	glycocholic acid	0.0144178	0.879488	8.6e-06
4835	Rhinovirus-2	nifuroxazide	0.0146945	0.881667	1.46e-05
2303	HCV	nitrofurantoin	0.0147009	0.882057	1.68e-05
1886	Hendra-virus	naphazoline	0.0147087	0.882521	1.62e-05
1886	Nipah-virus	naphazoline	0.0147087	0.882521	1.62e-05
1398	Reovirus	dihydroergotamine	0.0144741	0.882918	3e-06
5476	HCV	torasemide	0.0144815	0.883373	1.14e-05
6614	HCV	apramycin	0.0144815	0.883373	7.4e-06
1932	Influenza-A	metolazone	0.0144975	0.884347	1.1e-05
3807	Rhinovirus-16	beta-escin	0.014505	0.884805	3.2e-06
7422	Metapneumovirus	nortriptyline	0.0147601	0.885609	1.34e-05
166	dengue-2	rofecoxib	0.0147601	0.885609	1e-05
1657	Influenza-A	troglitazone	0.0145338	0.886562	1e-05
5671	RSV	doxorubicin	0.0147966	0.887793	6.8e-06
6187	HSV-1	geldanamycin	0.0145704	0.888792	1e-06
5207	Borna-disease-virus	alpha-estradiol	0.0148132	0.888792	1e-08
7138	HSV-2	carbinoxamine	0.0148147	0.88888	9.8e-06
2977	HIV-1	quinpirole	0.0148165	0.88899	1.56e-05
7076	HBV	PHA-00816795	0.0145971	0.89042	1e-05
2507	HIV-1	tetryzoline	0.0146036	0.890819	1.68e-05
2536	Borna-disease-virus	sulfamethizole	0.0146192	0.891773	1.48e-05
1320	RSV	dl-alpha tocopherol	0.0146361	0.892801	9.2e-06
1305	RSV	carcinine	0.0146361	0.892801	2.2e-05
1675	RSV	metrifonate	0.0146361	0.892801	1.56e-05
6055	Ebola	myosmine	0.0146401	0.893046	2.74e-05
578	Ebola	4,5-dianilinophthalimide	0.0146401	0.893046	1e-05
6225	Dengue-2	butacaine	0.0148855	0.893133	1.3e-05
1160	Coxsackievirus	monorden	0.0151702	0.895039	1e-07
1160	Duck-HBV	monorden	0.0151702	0.895039	1e-07
4439	EBV	prochlorperazine	0.0146945	0.896362	1e-05
4370	EBV	tinidazole	0.0146945	0.896362	1.62e-05
4320	Rhinovirus-2	piperacillin	0.0146945	0.896362	7.4e-06
4347	EBV	nialamide	0.0146945	0.896362	1.34e-05
2452	Reovirus	vigabatrin	0.0146962	0.896466	3.1e-05
6731	HCV	rolitetracycline	0.0147009	0.896758	7.6e-06
1802	Echovirus-1	dexpanthenol	0.0147087	0.89723	1.94e-05
1781	M.tuberculosis	demecarium bromide	0.0147087	0.89723	5.6e-06
3583	C.parvum	propoxycaine	0.0149643	0.897858	1.2e-05
1873	Newcastle-disease-virus	isoflupredone	0.0147601	0.900369	9.6e-06
7438	Metapneumovirus	isotretinoin	0.0147601	0.900369	1.34e-05
2842	dengue-2	tolazamide	0.0147601	0.900369	1.28e-05
7016	Newcastle-disease-virus	pargyline	0.0147601	0.900369	2.04e-05
1722	HTLV	propafenone	0.0147601	0.900369	1.06e-05
1505	Metapneumovirus	apomorphine	0.0147601	0.900369	6.4e-06
4969	Metapneumovirus	oxolamine	0.0147601	0.900369	9.2e-06
5433	Metapneumovirus	proxymetacaine	0.0147601	0.900369	1.2e-05
3899	Hantaan-virus	lithocholic acid	0.0147601	0.900369	1.06e-05
2864	Varicella-zoster-virus	dosulepin	0.0147601	0.900369	1.2e-05
6971	Tularensis	tretinoin	0.0147634	0.900569	1e-06
4115	Tularensis	oxybuprocaine	0.0147634	0.900569	1.16e-05
4402	WNV	tiabendazole	0.0147878	0.902054	1.98e-05
3906	Salmonella	CP-690334-01	0.0152966	0.902498	1e-05
6716	EBV	glycocholic acid	0.0150476	0.902855	8.6e-06
3574	C.difficile-toxin	piperacetazine	0.01481	0.90341	9.8e-06
1624	HSV-2	clofazimine	0.0148147	0.903695	8.4e-06
6029	HIV-1	famprofazone	0.0150849	0.905097	1.06e-05
6751	EBV	ceforanide	0.0148422	0.905372	7.6e-06
7195	Vaccinia-virus	doxycycline	0.0148649	0.906757	8.4e-06
2337	Vaccinia-virus	kawain	0.0148649	0.906757	1.74e-05
2380	Vaccinia-virus	lincomycin	0.0148649	0.906757	9e-06
1058	HIV-1	vorinostat	0.0151246	0.907478	1e-05
4567	C.difficile-toxin	cefixime	0.0148855	0.908018	8.8e-06
7008	Influenza-A	triprolidine	0.0148881	0.908174	1.28e-05
3224	Influenza-A	kanamycin	0.0148881	0.908174	6.8e-06
6562	WNV	16,16-dimethylprostaglandin E2	0.0148901	0.908299	1e-05
5388	HSV-1	butoconazole	0.0151503	0.909017	8.4e-06
1923	C.difficile-toxin	apomorphine	0.0156736	0.909071	6.4e-06
3310	Dengue-2	puromycin	0.0151649	0.909893	7.4e-06
1066	dengue-2	geldanamycin	0.0151702	0.910209	1e-06
1066	HIV-2	geldanamycin	0.0151702	0.910209	1e-06
2866	Measles	budesonide	0.0149643	0.912823	9.2e-06
4968	Dengue-2	harmaline	0.0149665	0.912956	1.4e-05
1151	Dengue-2	alpha-estradiol	0.0149665	0.912956	1e-08
4566	RSV	sulpiride	0.0152508	0.915047	1.18e-05
6843	Rhinovirus-16	isocorydine	0.0150209	0.916273	1.18e-05
454	Rhinovirus-16	cobalt chloride	0.0150209	0.916273	0.0001
3338	EBV	tetroquinone	0.0150476	0.917902	2.1e-05
6379	C.perfringens-epsilon-toxin	PF-00539758-00	0.015057	0.918476	1e-05
2151	Ebola	quinisocaine	0.0150581	0.918543	1.3e-05
1636	Polio	tretinoin	0.0150608	0.918709	1e-06
7169	Metapneumovirus	benzydamine	0.0155802	0.919229	1.16e-05
6612	RSV	palmatine	0.0150953	0.920815	1.04e-05
6030	HSV-2	metamizole sodium	0.015099	0.921039	1.2e-05
2244	EBV	dihydroergotamine	0.0151122	0.921845	3e-06
5943	HSV-2	rotenone	0.0151414	0.923627	1e-06
4064	C.perfringens-epsilon-toxin	corticosterone	0.0151503	0.924167	1.16e-05
7021	Newcastle-disease-virus	etamivan	0.0151702	0.925379	1.8e-05
2156	BVDV	dydrogesterone	0.0151702	0.925379	1.28e-05
641	dengue-2	benserazide	0.0151702	0.925379	1e-05
7172	Clostridium-perfringens-toxin	clindamycin	0.0151702	0.925379	8.6e-06
1825	HIV-2	heptaminol	0.0151702	0.925379	2.2e-05
2909	Varicella-zoster-virus	pancuronium bromide	0.0151702	0.925379	5.4e-06
4708	HIV-2	cefazolin	0.0151702	0.925379	8.4e-06
2840	Coronavirus-NL63	tiabendazole	0.0151702	0.925379	1.98e-05
978	Marburg	pyrvinium	0.0151902	0.926605	1.25e-06
978	Rhinovirus-16	pyrvinium	0.015215	0.926605	1.25e-06
5801	HIV-1	mephenytoin	0.0152036	0.927417	1.84e-05
2053	HBV	disulfiram	0.0154586	0.927518	1.34e-05
4128	HSV-2	azacitidine	0.0157409	0.928711	1.64e-05
6994	Influenza-A	genistein	0.0152325	0.929181	1e-05
2735	Ebola	cefoxitin	0.0152401	0.929645	8.8e-06
2225	Influenza-A	nalbuphine	0.0152742	0.931727	1.02e-05
5980	C.parvum	sirolimus	0.0152966	0.933091	1e-07
2176	Newcastle-disease-virus	citiolone	0.0155802	0.934809	2.52e-05
4680	Rhinovirus-16	digoxigenin	0.0155891	0.935346	1.02e-05
3755	Tularensis	citiolone	0.0153496	0.936325	2.52e-05
906	Rhinovirus-16	calmidazolium	0.0153598	0.93695	5e-06
4627	Influenza-A	altretamine	0.0153741	0.937822	1.9e-05
835	HIV-1	carbamazepine	0.0153812	0.938254	1e-07
370	Tularensis	troglitazone	0.0156466	0.938795	1e-05
3180	HSV-2	bupropion	0.0154021	0.93953	1.44e-05
2401	S.aureus-toxin	fenofibrate	0.0154351	0.941541	1.1e-05
6253	Rhinovirus-16	ellipticine	0.0157134	0.942805	1.62e-05
2279	Metapneumovirus	chlorphenesin	0.0159902	0.943419	1.62e-05
6908	Reovirus	BAS-012416453	0.0154724	0.943818	3.8e-05
2704	HCV	haloperidol	0.0154782	0.94417	1e-05
4657	HCV	amiodarone	0.0154782	0.94417	5.8e-06
1172	HSV-2	15-delta prostaglandin J2	0.0160246	0.94545	1e-05
2079	Hendra-virus	dexamethasone	0.0155226	0.946881	9.2e-06
2079	Nipah-virus	dexamethasone	0.0155226	0.946881	9.2e-06
4730	Hendra-virus	levonorgestrel	0.0155226	0.946881	1.28e-05
4730	Nipah-virus	levonorgestrel	0.0155226	0.946881	1.28e-05
1742	C.jejuni	scoulerine	0.0155226	0.946881	1.22e-05
1742	Group-B-streptococcus	scoulerine	0.0155226	0.946881	1.22e-05
2845	C.jejuni	orciprenaline	0.0155226	0.946881	7.6e-06
2845	Group-B-streptococcus	orciprenaline	0.0155226	0.946881	7.6e-06
3468	C.jejuni	azlocillin	0.0155226	0.946881	8.2e-06
3468	Group-B-streptococcus	azlocillin	0.0155226	0.946881	8.2e-06
973	WNV	quinostatin	0.0157903	0.947417	1e-05
5986	EBV	dosulepin	0.0155352	0.947649	1.2e-05
1638	Rhinovirus-16	alvespimycin	0.0155513	0.948627	1e-07
6513	Hantaan-virus	pizotifen	0.0155802	0.95039	9.4e-06
6211	HIV-2	etanidazole	0.0155802	0.95039	1.86e-05
3682	Hantaan-virus	Prestwick-675	0.0155802	0.95039	1e-05
7023	Newcastle-disease-virus	mecamylamine	0.0155802	0.95039	1.96e-05
2860	Clostridium-perfringens-toxin	tenoxicam	0.0155802	0.95039	1.18e-05
970	Newcastle-disease-virus	5230742	0.0155802	0.95039	1.7e-05
2733	HSV-2	methazolamide	0.0155857	0.950727	1.7e-05
6211	RSV	etanidazole	0.0158481	0.950889	1.86e-05
222	RSV	tomelukast	0.0158566	0.951398	1e-06
6803	Vaccinia-virus	propoxycaine	0.0156045	0.951874	1.2e-05
6151	HIV-1	azaperone	0.0156099	0.952205	1.22e-05
1927	HSV-2	verapamil	0.0156208	0.952867	8.2e-06
7283	Salmonella	norfloxacin	0.0156323	0.953569	1.26e-05
6685	C.parvum	meglumine	0.0156323	0.953569	2.04e-05
6161	C.perfringens-epsilon-toxin	propoxycaine	0.015638	0.953918	1.2e-05
4672	C.perfringens-epsilon-toxin	loperamide	0.015638	0.953918	7.8e-06
1993	Measles	acebutolol	0.0159116	0.954694	1.08e-05
1984	Measles	oxetacaine	0.0159116	0.954694	8.6e-06
5490	Influenza-A	niflumic acid	0.0156632	0.955454	1.42e-05
4800	Polio	minoxidil	0.015677	0.956295	1.92e-05
1066	Marburg	geldanamycin	0.0165144	0.957833	1e-06
6226	Cowpox	physostigmine	0.0157255	0.959254	6.2e-06
1761	BK-virus	syrosingopine	0.0159902	0.95941	6e-06
5013	Hantaan-virus	megestrol	0.0159902	0.95941	1.04e-05
7195	Varicella-zoster-virus	doxycycline	0.0159902	0.95941	8.4e-06
3574	Metapneumovirus	piperacetazine	0.0159902	0.95941	9.8e-06
6263	Varicella-zoster-virus	hydroquinine	0.0159902	0.95941	9.4e-06
7230	Borna-disease-virus	convolamine	0.0157448	0.960433	1.18e-05
6712	Ebola	dexibuprofen	0.01582	0.965021	1.94e-05
2381	HSV-2	flunarizine	0.0160907	0.96544	8.4e-06
4416	Dengue-2	diphemanil metilsulfate	0.0158447	0.966529	1.02e-05
6223	WNV	dizocilpine	0.0161277	0.96766	1.18e-05
961	C.difficile-toxin	5253409	0.0158647	0.967746	1.7e-05
5679	T.cruzi	Prestwick-860	0.0161423	0.968537	3.5e-05
593	S.aureus-toxin	geldanamycin	0.0161701	0.970207	1e-06
2448	Rhinovirus-16	puromycin	0.0162109	0.972653	7.4e-06
2298	Tularensis	metaraminol	0.0159461	0.972715	8.6e-06
6495	EBV	atropine methonitrate	0.0159635	0.973771	1.1e-05
5254	Rhinovirus-2	lorglumide	0.0159635	0.973771	8.4e-06
3197	Polio	furosemide	0.0159694	0.974131	1.2e-05
848	Metapneumovirus	felodipine	0.0159902	0.9754	1e-05
1822	BVDV	chlorpromazine	0.0159902	0.9754	1.12e-05
5608	Hantaan-virus	butyl hydroxybenzoate	0.0159902	0.9754	2.06e-05
4127	Hantaan-virus	sulmazole	0.0159902	0.9754	1.4e-05
3367	Hantaan-virus	dimethadione	0.0159902	0.9754	3.1e-05
6206	Ricin	ricinine	0.0159902	0.9754	2.44e-05
3347	Metapneumovirus	tolmetin	0.0159902	0.9754	1.26e-05
1470	Varicella-zoster-virus	amiloride	0.0159902	0.9754	1.32e-05
2331	Clostridium-perfringens-toxin	tiapride	0.0159902	0.9754	1.1e-05
1466	Varicella-zoster-virus	naphazoline	0.0159902	0.9754	1.62e-05
6774	Varicella-zoster-virus	anabasine	0.0159902	0.9754	2.46e-05
2966	Varicella-zoster-virus	ioxaglic acid	0.0159902	0.9754	3.2e-06
123	HSV-2	dexamethasone	0.0159993	0.975959	1e-06
2942	Echovirus-1	ozagrel	0.0160053	0.976323	1.52e-05
2836	HIV-1	benperidol	0.0160172	0.977047	1.04e-05
5016	Influenza-A	brinzolamide	0.0160571	0.979481	1.04e-05
6323	Influenza-A	cefoperazone	0.0160571	0.979481	5.8e-06
5392	WNV	metolazone	0.0160641	0.979911	1.1e-05
2840	HIV-1	tiabendazole	0.0163535	0.98121	1.98e-05
4236	HIV-1	SR-95531	0.016086	0.981244	1.08e-05
4988	HSV-2	doxazosin	0.0160907	0.98153	7.4e-06
6803	Varicella-zoster-virus	propoxycaine	0.0164002	0.98401	1.2e-05
1268	BVDV	pentoxyverine	0.0164002	0.98401	7.6e-06
1418	BK-virus	pargyline	0.0164002	0.98401	2.04e-05
5756	C.perfringens-epsilon-toxin	thiethylperazine	0.0161326	0.984088	6e-06
2473	HSV-1	pentamidine	0.0161326	0.984088	6.8e-06
4265	HIV-1	succinylsulfathiazole	0.0161454	0.98487	1.12e-05
6907	HCV	PF-00562151-00	0.0161612	0.985835	1e-05
1745	Rhinovirus-16	dihydroergocristine	0.0161894	0.987554	5.6e-06
1242	Rhinovirus-16	sirolimus	0.0161915	0.98768	1e-07
4463	HSV-1	LY-294002	0.0170376	0.988181	1e-05
5535	HCV	aztreonam	0.0162278	0.989895	9.2e-06
5465	HCV	pivampicillin	0.0162278	0.989895	8.6e-06
1171	RSV	thioridazine	0.0167873	0.990454	1e-05
5479	HIV-1	trimetazidine	0.0165221	0.991325	1.18e-05
253	HBV	LM-1685	0.0162745	0.992744	1e-05
3893	Rhinovirus-16	chlorcyclizine	0.0165507	0.993045	1.18e-05
7137	C.parvum	methylprednisolone	0.0171285	0.993453	1.06e-05
6705	Rhinovirus-16	moroxydine	0.0162912	0.993761	1.92e-05
6972	Tularensis	trichostatin A	0.0168556	0.994483	1e-07
5296	Rhinovirus-16	profenamine	0.0165845	0.995073	1.14e-05
3381	C.jejuni	nicotinic acid	0.0163363	0.996512	3.24e-05
3381	Group-B-streptococcus	nicotinic acid	0.0163363	0.996512	3.24e-05
2755	Echovirus-1	yohimbine	0.0163363	0.996512	1.02e-05
7074	Cocksackievirus-B3	MS-275	0.0166339	0.998035	1e-05
3785	EBV	fludrocortisone	0.0163969	1	9.4e-06
3531	EBV	cyclic adenosine monophosphate	0.0163969	1	1.22e-05
2937	Newcastle-disease-virus	gabexate	0.0164002	1	9.6e-06
6768	Metapneumovirus	tamoxifen	0.0164002	1	7e-06
424	BVDV	LY-294002	0.0164002	1	1e-07
2897	Hantaan-virus	lobelanidine	0.0164002	1	1.06e-05
2844	Newcastle-disease-virus	terconazole	0.0164002	1	7.6e-06
6618	Newcastle-disease-virus	protoveratrine A	0.0164002	1	5e-06
6834	Metapneumovirus	pindolol	0.0164002	1	1.62e-05
2768	Clostridium-perfringens-toxin	physostigmine	0.0164002	1	6.2e-06
3530	Varicella-zoster-virus	Prestwick-1082	0.0164002	1	1.2e-05
2950	Varicella-zoster-virus	roxarsone	0.0164002	1	1.52e-05
5605	Rhinovirus-16	alfuzosin	0.0164171	1	9.4e-06
4260	SARS	picrotoxinin	0.016423	1	1.36e-05
3557	C.parvum	ronidazole	0.0164866	1	2e-05
7454	Marburg	betulin	0.0165144	1	9e-06
6245	HSV-2	papaverine	0.0165238	1	1.06e-05
2719	HCV	pipenzolate bromide	0.0165769	1	9.2e-06
1607	Reovirus	methylergometrine	0.0166198	1	8.8e-06
3990	HSV-1	amiloride	0.016634	1	1.32e-05
2135	C.perfringens-epsilon-toxin	conessine	0.016634	1	1.12e-05
3506	HIV-1	pivampicillin	0.0167244	1	8.6e-06
164	EBV	dexverapamil	0.0167521	1	1e-05
921	Reovirus	sirolimus	0.0167554	1	1e-07
7510	HSV-2	BCB000039	0.0167867	1	1e-05
121	RSV	estradiol	0.0167873	1	1e-08
3684	Hantaan-virus	isocarboxazid	0.0168102	1	1.72e-05
5270	Hantaan-virus	thioperamide	0.0168102	1	9.8e-06
5421	Metapneumovirus	nimodipine	0.0168102	1	9.6e-06
4763	Varicella-zoster-virus	karakoline	0.0168102	1	1.06e-05
6947	HIV-2	clozapine	0.0168102	1	1e-05
3900	Newcastle-disease-virus	alpha-ergocryptine	0.0168102	1	7e-06
2198	N.gonorrhoeae	pramocaine	0.0168102	1	1.22e-05
4749	Hantaan-virus	prilocaine	0.0168102	1	1.56e-05
4749	Metapneumovirus	prilocaine	0.0168102	1	1.56e-05
5091	Coronavirus-NL63	nisoxetine	0.0168102	1	1.3e-05
3334	Hantaan-virus	theobromine	0.0168102	1	2.22e-05
3334	Metapneumovirus	theobromine	0.0168102	1	2.22e-05
3334	Newcastle-disease-virus	theobromine	0.0168102	1	2.22e-05
1468	Varicella-zoster-virus	minaprine	0.0168102	1	1.08e-05
7019	Hantaan-virus	hydroflumethiazide	0.0168102	1	1.2e-05
2824	dengue-2	salsolidin	0.0168102	1	1.64e-05
2329	Hantaan-virus	dantrolene	0.0168102	1	1.18e-05
1490	Varicella-zoster-virus	diflunisal	0.0168102	1	1.6e-05
1303	BVDV	arecoline	0.0168102	1	1.7e-05
4995	HCV	ketanserin	0.0168321	1	7e-06
5437	EBV	propafenone	0.0168355	1	1.06e-05
4280	EBV	tropicamide	0.0168355	1	1.4e-05
4281	EBV	lomefloxacin	0.0168355	1	1.04e-05
5826	Rhinovirus-16	strophanthidin	0.0168638	1	9.8e-06
5941	WNV	H-7	0.0168892	1	0.0001
2506	EBV	estropipate	0.0169487	1	9.2e-06
1776	C.difficile-toxin	physostigmine	0.016961	1	6.2e-06
4650	Marburg	cotinine	0.0170277	1	2.26e-05
1745	HBV	dihydroergocristine	0.0170444	1	5.6e-06
3203	Polio	alfuzosin	0.017054	1	9.4e-06
5079	HCV	mafenide	0.0170813	1	1.8e-05
6914	Rhinovirus-16	carmustine	0.0170895	1	0.0001
312	C.perfringens-epsilon-toxin	staurosporine	0.0171082	1	1e-06
1042	Rhinovirus-2	acetylsalicylic acid	0.0171145	1	0.0001
1899	Measles	idoxuridine	0.0171285	1	1.12e-05
7459	Influenza-A	esculetin	0.0171294	1	2.24e-05
1475	Vaccinia-virus	ticlopidine	0.017131	1	1.34e-05
2441	C.perfringens-epsilon-toxin	amphotericin B	0.0171423	1	4.4e-06
2459	C.perfringens-epsilon-toxin	nitrofural	0.0171423	1	2.02e-05
994	Hendra-virus	valproic acid	0.0171495	1	0.0002
994	Nipah-virus	valproic acid	0.0171495	1	0.0002
5279	Reovirus	biperiden	0.0171672	1	1.14e-05
4131	Reovirus	brompheniramine	0.0171672	1	9.2e-06
6610	C.difficile-toxin	carisoprodol	0.0171733	1	1.54e-05
7094	RSV	lomustine	0.0171799	1	0.0001
463	HCV	rofecoxib	0.0171802	1	1e-05
1079	WNV	estradiol	0.0171854	1	1e-08
3164	EBV	albendazole	0.0171953	1	1.5e-05
7188	Rhinovirus-16	fendiline	0.0172092	1	1.14e-05
941	HSV-2	rottlerin	0.0172102	1	1e-05
5691	WNV	hycanthone	0.0172102	1	1.12e-05
2758	EBV	ellipticine	0.0172174	1	1.62e-05
1475	Varicella-zoster-virus	ticlopidine	0.0172202	1	1.34e-05
3831	Varicella-zoster-virus	eldeline	0.0172202	1	7.8e-06
3402	Newcastle-disease-virus	primidone	0.0172202	1	1.84e-05
5878	SIV	acenocoumarol	0.0172202	1	1.14e-05
5878	WSN	acenocoumarol	0.0172202	1	1.14e-05
6670	Hantaan-virus	brinzolamide	0.0172202	1	1.04e-05
6230	Metapneumovirus	sulfinpyrazone	0.0172202	1	9.8e-06
6836	Metapneumovirus	diperodon	0.0172202	1	9.2e-06
6656	Hantaan-virus	colecalciferol	0.0172202	1	1.04e-05
6656	Metapneumovirus	colecalciferol	0.0172202	1	1.04e-05
2932	Varicella-zoster-virus	zalcitabine	0.0172202	1	1.9e-05
1482	Varicella-zoster-virus	hexamethonium bromide	0.0172202	1	1e-05
873	HSV-1	trichostatin A	0.0172288	1	1e-06
2000	HBV	tolazoline	0.0172466	1	2.04e-05
4404	HSV-2	proscillaridin	0.0172735	1	7.6e-06
5410	EBV	oxybenzone	0.0172793	1	1.76e-05
3924	Rhinovirus-2	solasodine	0.0172793	1	9.6e-06
3924	EBV	solasodine	0.0172793	1	9.6e-06
7074	Influenza-A	MS-275	0.0173072	1	1e-05
6416	HSV-2	PF-00539758-00	0.0173684	1	1e-05
1705	Dengue-2	dapsone	0.0173732	1	1.62e-05
874	Polio	depudecin	0.0173904	1	1e-06
6206	Cowpox	ricinine	0.0173915	1	2.44e-05
481	Polio	pirinixic acid	0.017397	1	0.0001
7052	Polio	0316684-0000	0.017397	1	1e-05
7486	Polio	CP-319743	0.0174064	1	1e-05
4258	HSV-2	buflomedil	0.0174187	1	1.16e-05
4289	EBV	0179445-0000	0.0174195	1	1e-05
367	SARS	fulvestrant	0.0174909	1	1e-06
7543	Borna-disease-virus	IC-86621	0.0175026	1	1e-06
1783	HSV-1	epivincamine	0.0175824	1	1.12e-05
6905	WNV	orlistat	0.0175876	1	1e-05
3283	Hendra-virus	digoxin	0.0175996	1	5.2e-06
3283	Nipah-virus	digoxin	0.0175996	1	5.2e-06
3860	HSV-2	phentolamine	0.0176038	1	1.26e-05
6905	Dengue-2	orlistat	0.0176063	1	1e-05
2403	Reovirus	pergolide	0.0176273	1	9.8e-06
6989	Metapneumovirus	thioridazine	0.0176302	1	1e-05
3103	Newcastle-disease-virus	nimodipine	0.0176302	1	9.6e-06
5020	Clostridium-perfringens-toxin	bretylium tosilate	0.0176302	1	9.6e-06
3455	Varicella-zoster-virus	drofenine	0.0176302	1	1.14e-05
5114	Newcastle-disease-virus	bethanechol	0.0176302	1	2.04e-05
3837	Varicella-zoster-virus	benfotiamine	0.0176302	1	8.6e-06
2138	Varicella-zoster-virus	palmatine	0.0176302	1	1.04e-05
4555	Coronavirus-NL63	citalopram	0.0176302	1	1e-06
4555	Metapneumovirus	citalopram	0.0176302	1	1e-06
6804	Hantaan-virus	midodrine	0.0176302	1	1.38e-05
4371	Coronavirus-229E	guaifenesin	0.0176302	1	2.02e-05
4371	Metapneumovirus	guaifenesin	0.0176302	1	2.02e-05
4371	Newcastle-disease-virus	guaifenesin	0.0176302	1	2.02e-05
6272	Newcastle-disease-virus	sulfamethizole	0.0176302	1	1.48e-05
3800	Coronavirus-NL63	ciclacillin	0.0176302	1	1.18e-05
6215	Varicella-zoster-virus	gallamine triethiodide	0.0176302	1	4.4e-06
2772	Clostridium-perfringens-toxin	cinchonidine	0.0176302	1	1.36e-05
4392	Metapneumovirus	novobiocin	0.0176302	1	6.4e-06
4392	Newcastle-disease-virus	novobiocin	0.0176302	1	6.4e-06
1500	Varicella-zoster-virus	tolazoline	0.0176302	1	2.04e-05
839	Reovirus	5224221	0.0176408	1	1.2e-05
7402	Reovirus	monensin	0.0176408	1	5.8e-06
5974	Rhinovirus-16	PF-00539745-00	0.0176432	1	1e-05
6672	C.perfringens-epsilon-toxin	metixene	0.0176572	1	1.16e-05
3287	C.perfringens-epsilon-toxin	progesterone	0.0176572	1	1.28e-05
2554	C.perfringens-epsilon-toxin	furaltadone	0.0176572	1	1.1e-05
5782	Rhinovirus-16	bupropion	0.0176648	1	1.44e-05
2927	WNV	sanguinarine	0.0176672	1	1.2e-05
3470	Borna-disease-virus	securinine	0.0176823	1	1.84e-05
913	Rhinovirus-16	colforsin	0.0177129	1	5e-05
4835	Rhinovirus-16	nifuroxazide	0.0177129	1	1.46e-05
1004	EBV	trifluoperazine	0.0177282	1	1e-05
3262	RSV	N-acetylmuramic acid	0.017761	1	1.36e-05
2569	HCV	guaifenesin	0.0177666	1	2.02e-05
4628	Polio	crotamiton	0.0177676	1	1.96e-05
5419	Tularensis	methotrexate	0.0177974	1	8.8e-06
2536	HIV-1	sulfamethizole	0.0177974	1	1.48e-05
6045	Marburg	methylbenzethonium chloride	0.0178057	1	8.6e-06
3773	Rhinovirus-16	PHA-00851261E	0.0178072	1	1e-05
7486	HSV-1	CP-319743	0.0178179	1	1e-05
1948	Polio	diltiazem	0.0178904	1	8.8e-06
5399	HSV-2	carbimazole	0.0179023	1	2.14e-05
4346	HIV-1	levcycloserine	0.01791	1	3.92e-05
3715	Vaccinia-virus	Prestwick-664	0.0179176	1	8.4e-06
1500	Vaccinia-virus	tolazoline	0.0179176	1	2.04e-05
4779	Rhinovirus-16	pyrimethamine	0.0179526	1	1.6e-05
6695	C.difficile-toxin	felodipine	0.017956	1	1.04e-05
1855	Influenza-A	triflupromazine	0.0179576	1	1.02e-05
1692	Influenza-A	nifedipine	0.0179576	1	1.16e-05
7264	C.jejuni	clorsulon	0.0179625	1	1.06e-05
7264	Group-B-streptococcus	clorsulon	0.0179625	1	1.06e-05
7404	Hendra-virus	ifenprodil	0.0179625	1	8.4e-06
7404	Nipah-virus	ifenprodil	0.0179625	1	8.4e-06
7251	Echovirus-1	chloroquine	0.0179625	1	7.8e-06
2927	Dengue-2	sanguinarine	0.0179663	1	1.2e-05
5479	Borna-disease-virus	trimetazidine	0.0180124	1	1.18e-05
5244	Coronavirus-229E	meclozine	0.0180402	1	8.6e-06
5244	Metapneumovirus	meclozine	0.0180402	1	8.6e-06
4477	Metapneumovirus	kinetin	0.0180402	1	1.86e-05
4832	Metapneumovirus	indoprofen	0.0180402	1	1.42e-05
5725	Clostridium-perfringens-toxin	ricinine	0.0180402	1	2.44e-05
5725	Hantaan-virus	ricinine	0.0180402	1	2.44e-05
5725	Metapneumovirus	ricinine	0.0180402	1	2.44e-05
5725	Varicella-zoster-virus	ricinine	0.0180402	1	2.44e-05
2489	Coronavirus-229E	tetramisole	0.0180402	1	1.66e-05
7357	Metapneumovirus	gabexate	0.0180402	1	9.6e-06
7357	Varicella-zoster-virus	gabexate	0.0180402	1	9.6e-06
6660	Metapneumovirus	hydroxyzine	0.0180402	1	9e-06
1823	HIV-2	amitriptyline	0.0180402	1	1.28e-05
5360	BVDV	chlortetracycline	0.0180402	1	7.8e-06
5093	Newcastle-disease-virus	carbamazepine	0.0180402	1	1.7e-05
7462	Newcastle-disease-virus	Prestwick-559	0.0180402	1	8.2e-06
4345	Newcastle-disease-virus	chlorambucil	0.0180402	1	1.32e-05
3418	HIV-2	flecainide	0.0180402	1	8.4e-06
4396	Varicella-zoster-virus	pentamidine	0.0180402	1	6.8e-06
2765	Varicella-zoster-virus	hydrocotarnine	0.0180402	1	1.32e-05
5947	Marburg	monorden	0.0180489	1	1e-07
2779	HSV-2	(+)-chelidonine	0.0180892	1	1.08e-05
2498	WNV	vancomycin	0.0180894	1	2.6e-06
3576	C.difficile-toxin	thiethylperazine	0.0180991	1	6e-06
4358	HSV-2	ciclacillin	0.0181023	1	1.18e-05
2462	Rhinovirus-2	thiostrepton	0.0181025	1	2.4e-06
7520	Tularensis	BCB000038	0.0181149	1	1e-05
5623	WNV	clioquinol	0.0181498	1	1.3e-05
3322	HSV-1	iohexol	0.018179	1	4.8e-06
5806	EBV	suxibuzone	0.0181821	1	9.2e-06
1319	HSV-2	cefotetan	0.0181979	1	7e-06
6717	HSV-2	promethazine	0.018204	1	1.24e-05
1791	Influenza-A	8-azaguanine	0.0182215	1	2.62e-05
3245	Measles	fusaric acid	0.0182593	1	2.24e-05
5084	HCV	resveratrol	0.0182594	1	1.76e-05
1929	HCV	cotinine	0.0182631	1	2.26e-05
369	Influenza-A	rosiglitazone	0.0182678	1	1e-05
6590	Influenza-A	dinoprostone	0.0182678	1	1e-05
7194	HIV-1	streptomycin	0.0182733	1	2.8e-06
3414	HSV-2	fluocinonide	0.0182888	1	8e-06
5696	Borna-disease-virus	androsterone	0.0183261	1	1.38e-05
1024	Tularensis	haloperidol	0.0183294	1	1e-05
7093	HSV-2	0316684-0000	0.0183375	1	1e-05
5301	Borna-disease-virus	nicotinic acid	0.0183444	1	3.24e-05
4782	C.perfringens-epsilon-toxin	canavanine	0.0183495	1	1.36e-05
4336	Influenza-A	phentolamine	0.0183498	1	1.26e-05
2344	Reovirus	salbutamol	0.0183554	1	1.68e-05
627	HIV-1	monastrol	0.018371	1	0.0001
4529	HIV-1	quinethazone	0.018371	1	1.38e-05
3210	Polio	chlorpropamide	0.0183926	1	1.44e-05
1822	Rhinovirus-16	chlorpromazine	0.0183946	1	1.12e-05
5756	RSV	thiethylperazine	0.0184056	1	6e-06
2938	Reovirus	alprostadil	0.0184125	1	1.12e-05
202	Marburg	raloxifene	0.0184318	1	1e-07
3740	Vaccinia-virus	gossypol	0.0184431	1	7.8e-06
2393	Newcastle-disease-virus	prednisolone	0.0184502	1	1.1e-05
5637	Clostridium-perfringens-toxin	methyldopa	0.0184502	1	1.9e-05
7461	Hantaan-virus	acetazolamide	0.0184502	1	1.8e-05
3225	Hantaan-virus	ascorbic acid	0.0184502	1	2.24e-05
6010	Varicella-zoster-virus	triamterene	0.0184502	1	1.58e-05
7189	BK-virus	iopamidol	0.0184502	1	5.2e-06
7189	BVDV	iopamidol	0.0184502	1	5.2e-06
2043	BK-virus	paclitaxel	0.0184502	1	4.6e-06
3739	Metapneumovirus	foliosidine	0.0184502	1	1.3e-05
2287	Coronavirus-NL63	mafenide	0.0184502	1	1.8e-05
5277	Metapneumovirus	clofazimine	0.0184502	1	8.4e-06
5563	Newcastle-disease-virus	haloperidol	0.0184502	1	1e-05
6771	Varicella-zoster-virus	monocrotaline	0.0184502	1	1.22e-05
2182	P.vivax	bromopride	0.0184502	1	1.16e-05
4312	Marburg	benfotiamine	0.0184595	1	8.6e-06
6611	Polio	betahistine	0.0184978	1	1.72e-05
2923	HIV-1	moxonidine	0.0185306	1	1.66e-05
4844	Borna-disease-virus	tolazoline	0.0185307	1	2.04e-05
2503	Borna-disease-virus	suxibuzone	0.0185307	1	9.2e-06
1547	Rhinovirus-16	albendazole	0.0185581	1	1.5e-05
575	WNV	copper sulfate	0.0185613	1	0.0001
3075	WNV	cantharidin	0.0185659	1	2.04e-05
6142	Rhinovirus-16	dorzolamide	0.0185856	1	1.1e-05
7532	Reovirus	CP-319743	0.0186114	1	1e-05
[truncated: 4,391 more rows]

## Sheet: Predicted drugs for anti-HIV-1
Drug ID	Associated Pathogen	Predicted drugs for anti-HIV-1 indications	p-value (Fisher'e exact test)	Adjusted p-value	Tested drug concentration in CMap database
2321	HIV-1	camptothecin	6.09e-05	0.0037149	1.14e-05
4475	HIV-1	sertaconazole	9.39e-05	0.0057279	8e-06
7051	HIV-1	alsterpaullone	0.000174467	0.0106425	1e-05
3808	HIV-1	lycorine	0.000232709	0.0141952	1.24e-05
2927	HIV-1	sanguinarine	0.00031902	0.0194602	1.2e-05
5271	HIV-1	testosterone	0.000619918	0.037815	1.16e-05
4089	HIV-1	amylocaine	0.000740992	0.0452005	1.48e-05
6049	HIV-1	2,6-dimethylpiperidine	0.000752301	0.0458904	2.68e-05
7408	HIV-1	triprolidine	0.000906921	0.0553222	1.28e-05
2929	HIV-1	fursultiamine	0.0009652	0.0588772	9.2e-06
6916	HIV-1	trichostatin A	0.00112535	0.0686463	1e-06
3291	HIV-1	doxorubicin	0.00118782	0.0712692	6.8e-06
383	HIV-1	cobalt chloride	0.00121136	0.0738929	0.0001
6867	HIV-1	fulvestrant	0.00127753	0.0779296	1e-06
6477	HIV-1	promethazine	0.00134809	0.0808857	1.24e-05
3541	HIV-1	viomycin	0.00135041	0.0823748	5.2e-06
1791	HIV-1	8-azaguanine	0.00169316	0.103283	2.62e-05
3630	HIV-1	0179445-0000	0.00196116	0.119631	1e-05
1432	HIV-1	chlorphenesin	0.0022216	0.135518	1.62e-05
312	HIV-1	staurosporine	0.00238209	0.145307	1e-06
3289	HIV-1	biotin	0.00250589	0.152859	1.64e-05
2915	HIV-1	etamsylate	0.00260251	0.148343	1.52e-05
1961	HIV-1	guanabenz	0.00266979	0.162857	1.38e-05
2546	HIV-1	meclofenoxate	0.00292943	0.178695	1.36e-05
5320	HIV-1	paclitaxel	0.00295204	0.180075	4.6e-06
4463	HIV-1	LY-294002	0.00305045	0.183027	1e-05
7067	HIV-1	GW-8510	0.00324839	0.198152	1e-05
2658	HIV-1	anisomycin	0.00337785	0.206049	1.5e-05
6306	HIV-1	ascorbic acid	0.00372624	0.227301	2.24e-05
4371	HIV-1	guaifenesin	0.00372624	0.223574	2.02e-05
1749	HIV-1	ajmaline	0.00376461	0.225876	1.22e-05
1420	HIV-1	flufenamic acid	0.00405994	0.247656	1.42e-05
6900	HIV-1	0297417-0002B	0.0040707	0.248312	1e-05
2739	HIV-1	iopromide	0.00418243	0.255128	5e-06
2763	HIV-1	lobeline	0.00424638	0.259029	1.06e-05
2439	HIV-1	menadione	0.0049386	0.296316	2.32e-05
3449	HIV-1	sulfanilamide	0.00494991	0.301945	2.32e-05
3035	HIV-1	sulconazole	0.0050144	0.305879	8.6e-06
436	HIV-1	fasudil	0.00507762	0.309735	1e-05
4082	HIV-1	yohimbic acid	0.00538587	0.328538	1.12e-05
3729	HIV-1	ketoprofen	0.00553301	0.337514	1.58e-05
2750	HIV-1	harmine	0.0055852	0.340697	1.6e-05
3267	HIV-1	ciclosporin	0.00605393	0.36929	3.4e-06
3412	HIV-1	fenoprofen	0.00606702	0.370088	7.2e-06
2167	HIV-1	benzocaine	0.00606702	0.370088	2.42e-05
2691	HIV-1	15-delta prostaglandin J2	0.00615761	0.369456	1e-05
3382	HIV-1	3-acetylcoumarin	0.00625585	0.381607	2.12e-05
6666	HIV-1	dicloxacillin	0.0064321	0.392358	8.2e-06
6864	HIV-1	STOCK1N-28457	0.00672288	0.410096	2e-05
1761	HIV-1	syrosingopine	0.0068956	0.420632	6e-06
6396	HIV-1	F0447-0125	0.00699795	0.426875	1e-05
1673	HIV-1	sulfaphenazole	0.0072039	0.432234	1.28e-05
4983	HIV-1	daunorubicin	0.00730949	0.43857	7e-06
3739	HIV-1	foliosidine	0.00741544	0.452342	1.3e-05
5629	HIV-1	pentetic acid	0.00744849	0.454358	1.02e-05
4313	HIV-1	furaltadone	0.00806677	0.492073	1.1e-05
3078	HIV-1	urapidil	0.00858902	0.52393	9.4e-06
141	HIV-1	chlorpropamide	0.00879985	0.536791	0.0001
2505	HIV-1	ricinine	0.00889784	0.53387	2.44e-05
5729	HIV-1	disulfiram	0.00970932	0.592269	1.34e-05
3794	HIV-1	oxaprozin	0.00985627	0.601232	1.36e-05
5487	HIV-1	metformin	0.0102123	0.622952	2.42e-05
2850	HIV-1	nifuroxazide	0.0103856	0.633522	1.46e-05
4199	HIV-1	molindone	0.0110321	0.672956	1.28e-05
4600	HIV-1	iocetamic acid	0.0126561	0.772021	6.6e-06
5249	HIV-1	phthalylsulfathiazole	0.0127191	0.775862	1e-05
3167	HIV-1	labetalol	0.01279	0.780189	1.1e-05
2235	HIV-1	cefotaxime	0.0129012	0.786973	8.4e-06
5997	HIV-1	imipenem	0.0129148	0.787804	1.34e-05
6585	HIV-1	6-bromoindirubin-3'-oxime	0.013023	0.794402	5e-07
4013	HIV-1	brompheniramine	0.0137826	0.826955	9.2e-06
1114	HIV-1	tyrphostin AG-825	0.0138326	0.816122	2.52e-05
4073	HIV-1	sitosterol	0.0140088	0.84053	9.6e-06
3743	HIV-1	diphenylpyraline	0.0142168	0.867223	1.26e-05
2507	HIV-1	tetryzoline	0.0146036	0.890819	1.68e-05
2977	HIV-1	quinpirole	0.0148165	0.88899	1.56e-05
6029	HIV-1	famprofazone	0.0150849	0.905097	1.06e-05
1058	HIV-1	vorinostat	0.0151246	0.907478	1e-05
5801	HIV-1	mephenytoin	0.0152036	0.927417	1.84e-05
835	HIV-1	carbamazepine	0.0153812	0.938254	1e-07
6151	HIV-1	azaperone	0.0156099	0.952205	1.22e-05
2836	HIV-1	benperidol	0.0160172	0.977047	1.04e-05
4236	HIV-1	SR-95531	0.016086	0.981244	1.08e-05
4265	HIV-1	succinylsulfathiazole	0.0161454	0.98487	1.12e-05
2840	HIV-1	tiabendazole	0.0163535	0.98121	1.98e-05
5479	HIV-1	trimetazidine	0.0165221	0.991325	1.18e-05
3506	HIV-1	pivampicillin	0.0167244	1	8.6e-06
2536	HIV-1	sulfamethizole	0.0177974	1	1.48e-05
4346	HIV-1	levcycloserine	0.01791	1	3.92e-05
7194	HIV-1	streptomycin	0.0182733	1	2.8e-06
627	HIV-1	monastrol	0.018371	1	0.0001
4529	HIV-1	quinethazone	0.018371	1	1.38e-05
2923	HIV-1	moxonidine	0.0185306	1	1.66e-05
5000	HIV-1	methotrexate	0.0189259	1	8.8e-06
3123	HIV-1	denatonium benzoate	0.018981	1	9e-06
1923	HIV-1	apomorphine	0.0193365	1	6.4e-06
2251	HIV-1	ranitidine	0.0194401	1	1.14e-05
6807	HIV-1	astemizole	0.0195036	1	8.8e-06
3324	HIV-1	liothyronine	0.0197512	1	6.2e-06
5782	HIV-1	bupropion	0.0198113	1	1.44e-05
6651	HIV-1	velnacrine	0.0200618	1	1.22e-05
2965	HIV-1	iopanoic acid	0.0202057	1	7e-06
7535	HIV-1	irinotecan	0.0202255	1	0.0001
5743	HIV-1	cicloheximide	0.0203603	1	1.42e-05
4766	HIV-1	finasteride	0.0203854	1	1.08e-05
3421	HIV-1	ethoxyquin	0.0203854	1	1.84e-05
2447	HIV-1	ceforanide	0.0213149	1	7.6e-06
5769	HIV-1	papaverine	0.0219336	1	1.06e-05
2093	HIV-1	etofylline	0.0221264	1	1.78e-05
7202	HIV-1	glibenclamide	0.0221806	1	8e-06
3397	HIV-1	digoxigenin	0.0225059	1	1.02e-05
430	HIV-1	rosiglitazone	0.0226845	1	1e-05
7239	HIV-1	bambuterol	0.0227872	1	1e-05
411	HIV-1	sodium phenylbutyrate	0.0229615	1	0.001
5053	HIV-1	antimycin A	0.0229615	1	7.2e-06
6123	HIV-1	meprylcaine	0.0231565	1	1.48e-05
7341	HIV-1	cefalonium	0.0232476	1	8.8e-06
2033	HIV-1	loperamide	0.0232476	1	7.8e-06
6899	HIV-1	SB-203580	0.0232653	1	1e-06
882	HIV-1	ionomycin	0.0239448	1	2e-06
4136	HIV-1	niclosamide	0.0246124	1	1.22e-05
5463	HIV-1	ifenprodil	0.024719	1	8.4e-06
2967	HIV-1	lansoprazole	0.0248628	1	1.08e-05
4807	HIV-1	nystatin	0.024908	1	4.4e-06
7226	HIV-1	pirenzepine	0.025164	1	9.4e-06
5219	HIV-1	valproic acid	0.0252293	1	5e-05
3190	HIV-1	fendiline	0.0254582	1	1.14e-05
5677	HIV-1	bisacodyl	0.0256159	1	1.1e-05
3741	HIV-1	karakoline	0.0260721	1	1.06e-05
3827	HIV-1	PHA-00745360	0.0260721	1	1e-06
165	HIV-1	exemestane	0.0260721	1	1e-08
2875	HIV-1	thiocolchicoside	0.0264008	1	7e-06
6555	HIV-1	alprostadil	0.0264573	1	1e-05
5691	HIV-1	hycanthone	0.0264854	1	1.12e-05
4222	HIV-1	amantadine	0.026609	1	9.6e-06
5875	HIV-1	gabapentin	0.0271489	1	2.34e-05
2357	HIV-1	phenelzine	0.0271489	1	1.7e-05
6172	HIV-1	alvespimycin	0.0273558	1	1e-07
5805	HIV-1	ifosfamide	0.0274328	1	1.54e-05
3701	HIV-1	levomepromazine	0.0274413	1	9e-06
7131	HIV-1	ronidazole	0.0281265	1	2e-05
1526	HIV-1	midecamycin	0.0281265	1	5e-06
6558	HIV-1	5194442	0.0282179	1	2e-05
3419	HIV-1	spiramycin	0.028789	1	4.8e-06
3012	HIV-1	(+/-)-catechin	0.0288338	1	1.38e-05
1553	HIV-1	oxytetracycline	0.029049	1	8e-06
1742	HIV-1	scoulerine	0.02943	1	1.22e-05
1940	HIV-1	dehydrocholic acid	0.0297335	1	9.6e-06
5303	HIV-1	methylergometrine	0.0297335	1	8.8e-06
1953	HIV-1	lynestrenol	0.0297335	1	1.4e-05
4506	HIV-1	oxyphenbutazone	0.0303684	1	1.24e-05
2919	HIV-1	tracazolate	0.0305367	1	1.18e-05
2169	HIV-1	mepenzolate bromide	0.0311357	1	9.6e-06
1413	HIV-1	pyrantel	0.0313173	1	1.12e-05
6639	HIV-1	lasalocid	0.0320614	1	6.6e-06
3992	HIV-1	phenacetin	0.0320851	1	2.24e-05
4461	HIV-1	fluphenazine	0.0323578	1	1e-05
6723	HIV-1	primidone	0.0326227	1	1.84e-05
5941	HIV-1	H-7	0.0334082	1	0.0001
6947	HIV-1	clozapine	0.0340867	1	1e-05
6355	HIV-1	10-methoxyharmalan	0.0340867	1	1.86e-05
3357	HIV-1	scopolamine	0.0343043	1	1.18e-05
7103	HIV-1	thapsigargin	0.0352792	1	1e-07
7030	HIV-1	laudanosine	0.0353062	1	1.12e-05
3374	HIV-1	aminophylline	0.0353062	1	9.6e-06
2931	HIV-1	tocainide	0.0353062	1	1.74e-05
1687	HIV-1	hydroflumethiazide	0.0353062	1	1.2e-05
4963	HIV-1	protoveratrine A	0.0353429	1	5e-06
5269	HIV-1	flurbiprofen	0.0354792	1	1.64e-05
7480	HIV-1	Prestwick-983	0.0355452	1	1.7e-05
4489	HIV-1	hydrocotarnine	0.0355675	1	1.32e-05
2207	HIV-1	betonicine	0.0355675	1	2.52e-05
7004	HIV-1	asiaticoside	0.0355675	1	4.2e-06
972	HIV-1	geldanamycin	0.0357428	1	1e-06
6514	HIV-1	alfaxalone	0.0357428	1	1.2e-05
4366	HIV-1	ethotoin	0.0357428	1	1.96e-05
6170	HIV-1	tretinoin	0.0358693	1	1e-06
3603	HIV-1	medrysone	0.0358959	1	1.16e-05
204	HIV-1	sulfasalazine	0.0359917	1	0.0001
3254	HIV-1	lumicolchicine	0.036453	1	1e-05
5811	HIV-1	benzydamine	0.036453	1	1.16e-05
5920	HIV-1	rotenone	0.0368163	1	1e-06
6319	HIV-1	hexetidine	0.0368171	1	1.18e-05
6672	HIV-1	metixene	0.0369094	1	1.16e-05
2726	HIV-1	bergenin	0.0369094	1	1.16e-05
7277	HIV-1	azapropazone	0.0373477	1	1.34e-05
2486	HIV-1	trimethadione	0.0373477	1	2.8e-05
6617	HIV-1	pyrazinamide	0.037801	1	3.24e-05
5385	HIV-1	amoxicillin	0.037801	1	1.1e-05
663	HIV-1	U0125	0.037801	1	1e-06
6028	HIV-1	promazine	0.0381731	1	1.24e-05
3773	HIV-1	PHA-00851261E	0.0381731	1	1e-05
4234	HIV-1	gibberellic acid	0.03818	1	1.16e-05
6163	HIV-1	haloperidol	0.0382681	1	1e-05
5358	HIV-1	propranolol	0.0384922	1	1.36e-05
256	HIV-1	rofecoxib	0.0385037	1	1e-05
3106	HIV-1	chrysin	0.0386589	1	1.58e-05
1103	HIV-1	demecolcine	0.0386614	1	1.17e-05
1403	HIV-1	midodrine	0.0394825	1	1.38e-05
3045	HIV-1	hymecromone	0.0395387	1	2.28e-05
1402	HIV-1	ampyrone	0.0395634	1	1.96e-05
7276	HIV-1	disopyramide	0.0397167	1	1.18e-05
1508	HIV-1	glipizide	0.0399189	1	9e-06
2905	HIV-1	cyclopenthiazide	0.0399931	1	1.06e-05
2831	HIV-1	L-methionine sulfoximine	0.0401931	1	2.22e-05
7253	HIV-1	atropine methonitrate	0.0401931	1	1.1e-05
3384	HIV-1	(+)-isoprenaline	0.0401931	1	1.1e-05
1540	HIV-1	perphenazine	0.0409337	1	1e-05
5605	HIV-1	alfuzosin	0.0409337	1	9.4e-06
7354	HIV-1	memantine	0.0410678	1	1.86e-05
4823	HIV-1	fosfosal	0.0410678	1	1.84e-05
5476	HIV-1	torasemide	0.0410823	1	1.14e-05
449	HIV-1	monorden	0.0415171	1	1e-07
3325	HIV-1	etidronic acid	0.0417025	1	1.6e-05
3447	HIV-1	hexylcaine	0.0417025	1	1.34e-05
4090	HIV-1	myricetin	0.0417199	1	1.26e-05
1830	HIV-1	diphenhydramine	0.0418203	1	1.38e-05
6361	HIV-1	acemetacin	0.0420757	1	9.6e-06
1942	HIV-1	chlorhexidine	0.0420988	1	8e-06
3348	HIV-1	azacitidine	0.0427614	1	1.64e-05
2951	HIV-1	piribedil	0.04285	1	1.2e-05
4105	HIV-1	fusaric acid	0.0434154	1	2.24e-05
4327	HIV-1	helveticoside	0.0436671	1	7.4e-06
422	HIV-1	thioridazine	0.0441711	1	1e-06
2317	HIV-1	nefopam	0.0441711	1	1.38e-05
2107	HIV-1	xylometazoline	0.0441711	1	1.42e-05
1768	HIV-1	atropine	0.0445402	1	5.8e-06
2734	HIV-1	clidinium bromide	0.0447526	1	9.2e-06
1782	HIV-1	racecadotril	0.0447641	1	1.04e-05
4624	HIV-1	ketoconazole	0.0447896	1	7.6e-06
4774	HIV-1	meptazinol	0.0447896	1	1.48e-05
2528	HIV-1	sulfaquinoxaline	0.0450497	1	1.24e-05
3093	HIV-1	pipemidic acid	0.0450533	1	1.32e-05
1769	HIV-1	ipratropium bromide	0.0461265	1	9.8e-06
6315	HIV-1	prazosin	0.0461702	1	9.6e-06
1436	HIV-1	hydrastinine	0.0462973	1	1.64e-05
4367	HIV-1	chlorcyclizine	0.0468297	1	1.18e-05
6958	HIV-1	sirolimus	0.048356	1	1e-07
6228	HIV-1	dihydrostreptomycin	0.048356	1	2.8e-06
4175	HIV-1	4-hydroxyphenazone	0.0484452	1	1.96e-05
4394	HIV-1	levodopa	0.0484452	1	2.02e-05
1301	HIV-1	domperidone	0.0485766	1	7.4e-06
5790	HIV-1	tropine	0.0488301	1	2.84e-05
7015	HIV-1	moxisylyte	0.0488301	1	1.26e-05
3879	HIV-1	homosalate	0.0490179	1	1.52e-05
2491	HIV-1	colistin	0.0490179	1	3e-06
3310	HIV-1	puromycin	0.0495448	1	7.4e-06

## Sheet: Predicted drugs for anti-Ebola
Drug ID	Associated Pathogen	Predicted drugs for anti-HIV-1 indications	p-value (Fisher'e exact test)	Adjusted p-value	Tested drug concentration in CMap database
1749	Ebola	ajmaline	3.39e-05	0.0020679	1.22e-05
2505	Ebola	ricinine	0.000123851	0.00755491	2.44e-05
3220	Ebola	clopamide	0.000256447	0.0156433	1.16e-05
7445	Ebola	piroxicam	0.000476497	0.0290663	1.2e-05
2038	Ebola	danazol	0.000869437	0.0530357	1.18e-05
2020	Ebola	azacyclonol	0.00150862	0.0920256	1.5e-05
1402	Ebola	ampyrone	0.00152618	0.0930968	1.96e-05
1726	Ebola	thiocolchicoside	0.0032508	0.198299	7e-06
1546	Ebola	glibenclamide	0.00386733	0.235907	8e-06
5212	Ebola	prochlorperazine	0.0053271	0.324953	1e-05
6264	Ebola	tropine	0.0056339	0.338034	2.84e-05
3348	Ebola	azacitidine	0.0057539	0.350988	1.64e-05
2424	Ebola	meclozine	0.00595122	0.363024	8.6e-06
2727	Ebola	azlocillin	0.0060136	0.36683	8.2e-06
411	Ebola	sodium phenylbutyrate	0.00622263	0.37958	0.001
3065	Ebola	primidone	0.00645168	0.393553	1.84e-05
1373	Ebola	clindamycin	0.00755339	0.460757	8.6e-06
5601	Ebola	estradiol	0.00769901	0.469639	1e-08
2540	Ebola	podophyllotoxin	0.00834392	0.500635	9.6e-06
6086	Ebola	cefmetazole	0.00887992	0.541675	8.2e-06
3045	Ebola	hymecromone	0.00912421	0.556577	2.28e-05
1416	Ebola	chlorzoxazone	0.0104451	0.637154	2.36e-05
425	Ebola	staurosporine	0.0105599	0.633595	1e-08
3669	Ebola	metaraminol	0.0110754	0.6756	8.6e-06
5588	Ebola	geldanamycin	0.0111736	0.681589	1e-06
3063	Ebola	2-aminobenzenesulfonamide	0.0111736	0.670416	2.32e-05
6764	Ebola	anisomycin	0.0112376	0.685491	1.5e-05
2739	Ebola	iopromide	0.0112386	0.674318	5e-06
2042	Ebola	chlortetracycline	0.0118681	0.723955	7.8e-06
3935	Ebola	eucatropine	0.0125321	0.764456	1.22e-05
2381	Ebola	flunarizine	0.0125321	0.764456	8.4e-06
1942	Ebola	chlorhexidine	0.012546	0.765304	8e-06
5565	Ebola	fulvestrant	0.0130412	0.782473	1e-06
6055	Ebola	myosmine	0.0146401	0.893046	2.74e-05
578	Ebola	4,5-dianilinophthalimide	0.0146401	0.893046	1e-05
2151	Ebola	quinisocaine	0.0150581	0.918543	1.3e-05
2735	Ebola	cefoxitin	0.0152401	0.929645	8.8e-06
6712	Ebola	dexibuprofen	0.01582	0.965021	1.94e-05
4713	Ebola	0175029-0000	0.0193435	1	1e-05
4983	Ebola	daunorubicin	0.0201737	1	7e-06
2689	Ebola	clozapine	0.0208902	1	1e-05
1712	Ebola	dirithromycin	0.0211542	1	4.8e-06
5673	Ebola	capsaicin	0.0218405	1	1.3e-05
2986	Ebola	theophylline	0.0221264	1	2.02e-05
6136	Ebola	trifluridine	0.0221264	1	1.36e-05
327	Ebola	arachidonyltrifluoromethane	0.0228301	1	1e-05
3022	Ebola	iocetamic acid	0.0233164	1	6.6e-06
143	Ebola	tamoxifen	0.0242744	1	1e-06
6167	Ebola	sirolimus	0.0243343	1	1e-07
1833	Ebola	8-azaguanine	0.025628	1	2.62e-05
2000	Ebola	tolazoline	0.0279458	1	2.04e-05
3503	Ebola	ozagrel	0.028905	1	1.52e-05
871	Ebola	ionomycin	0.0294145	1	2e-06
5599	Ebola	LY-294002	0.0297201	1	1e-05
313	Ebola	NU-1025	0.0304267	1	0.0001
4224	Ebola	benzocaine	0.0304678	1	2.42e-05
3413	Ebola	furaltadone	0.030914	1	1.1e-05
978	Ebola	pyrvinium	0.0331045	1	1.25e-06
2512	Ebola	anabasine	0.0331045	1	2.46e-05
4786	Ebola	atovaquone	0.033537	1	1.1e-05
7067	Ebola	GW-8510	0.0335611	1	1e-05
4765	Ebola	diphenylpyraline	0.0340033	1	1.26e-05
1155	Ebola	valproic acid	0.0340033	1	0.0002
2253	Ebola	norfloxacin	0.0340033	1	1.26e-05
5671	Ebola	doxorubicin	0.034137	1	6.8e-06
4847	Ebola	succinylsulfathiazole	0.034871	1	1.12e-05
5270	Ebola	thioperamide	0.0355922	1	9.8e-06
5073	Ebola	loracarbef	0.0357727	1	1.08e-05
3100	Ebola	promethazine	0.0372099	1	1.24e-05
2695	Ebola	genistein	0.0380495	1	1e-05
4220	Ebola	gabexate	0.0386375	1	9.6e-06
4371	Ebola	guaifenesin	0.038856	1	2.02e-05
2772	Ebola	cinchonidine	0.038856	1	1.36e-05
5053	Ebola	antimycin A	0.0395025	1	7.2e-06
5499	Ebola	mafenide	0.0404655	1	1.8e-05
4122	Ebola	boldine	0.04053	1	1.22e-05
3894	Ebola	pramocaine	0.04053	1	1.22e-05
3216	Ebola	hemicholinium	0.0422316	1	7e-06
2182	Ebola	bromopride	0.0422316	1	1.16e-05
3058	Ebola	trichostatin A	0.0432956	1	1e-07
2285	Ebola	nifenazone	0.043428	1	1.3e-05
1316	Ebola	SR-95531	0.0435153	1	1.08e-05
1968	Ebola	minaprine	0.0435153	1	1.08e-05
1556	Ebola	antazoline	0.0435153	1	1.32e-05
4603	Ebola	practolol	0.0437957	1	1.5e-05
123	Ebola	dexamethasone	0.0439601	1	1e-06
6420	Ebola	orlistat	0.0449983	1	1e-05
2552	Ebola	flunixin	0.04509	1	8.2e-06
428	Ebola	tanespimycin	0.0454636	1	1e-06
609	Ebola	5666823	0.0457153	1	0.0001
3725	Ebola	phenformin	0.0457153	1	1.66e-05
7542	Ebola	BCB000038	0.045953	1	1e-05
2724	Ebola	amrinone	0.0464995	1	2.14e-05
3582	Ebola	oxyphenbutazone	0.0474966	1	1.24e-05
6249	Ebola	DL-thiorphan	0.0474966	1	1.58e-05
5432	Ebola	fenoterol	0.0474966	1	1.04e-05
5930	Ebola	pioglitazone	0.0486075	1	1e-05
2529	Ebola	nadide	0.0486075	1	6e-06
2992	Ebola	roxithromycin	0.0496794	1	4.8e-06

## Sheet: Predicted drugs for anti-HCV
Drug ID	Associated Pathogen	Predicted_drugs_for_anti-HIV-1_indications	p-value (Fisher'e exact test)	Adjusted p-value	Tested drug concentration in CMap database
3780	HCV	proglumide	0.000265141	0.0161736	1.2e-05		proglumide	N/A
2848	HCV	methoxamine	0.000531883	0.0324449	1.62e-05		methoxamine	N/A
4221	HCV	tolnaftate	0.000611231	0.0372851	1.3e-05		tolnaftate	N/A
2756	HCV	diclofenac	0.000641389	0.0391247	1.26e-05		diclofenac	N/A
2531	HCV	butamben	0.000692851	0.0422639	2.06e-05		butamben	N/A
2449	HCV	serotonin	0.000755661	0.0460953	1.88e-05		serotonin	N/A
7417	HCV	homochlorcyclizine	0.000755822	0.0461051	1.04e-05		homochlorcyclizine	0.47	Sci. Transl. Med. 7, 282ra49 (2015)
5493	HCV	chlorpromazine	0.000778251	0.0474733	1.12e-05		chlorpromazine	>100	Sci. Transl. Med. 7, 282ra49 (2015)
1923	HCV	apomorphine	0.000798939	0.0487353	6.4e-06		apomorphine	N/A
6078	HCV	trioxysalen	0.00123191	0.0751463	1.76e-05		trioxysalen	N/A
7513	HCV	IC-86621	0.00135685	0.082768	1e-06		IC-86621	N/A
2799	HCV	gramine	0.00188467	0.114965	2.3e-05		gramine	N/A
4413	HCV	vitexin	0.00209798	0.127977	9.2e-06		vitexin	N/A
3608	HCV	cloperastine	0.00236186	0.144074	1.1e-05		cloperastine	N/A
7175	HCV	hecogenin	0.00287402	0.175315	9.2e-06		hecogenin	N/A
6728	HCV	betamethasone	0.0028885	0.176198	1.02e-05		betamethasone	N/A
4274	HCV	fenoprofen	0.00310575	0.189451	7.2e-06		fenoprofen	N/A
3701	HCV	levomepromazine	0.00319654	0.194989	9e-06		levomepromazine	N/A
2934	HCV	memantine	0.00332155	0.202615	1.86e-05		memantine	N/A
7459	HCV	esculetin	0.00380928	0.232366	2.24e-05		esculetin	N/A
3218	HCV	sulfafurazole	0.00385705	0.23528	1.5e-05		sulfafurazole	N/A
2915	HCV	etamsylate	0.00420183	0.2311	1.52e-05		etamsylate	N/A
4781	HCV	benperidol	0.00434547	0.256383	1.04e-05		benperidol	N/A
1844	HCV	dexpanthenol	0.00436236	0.266104	1.94e-05		dexpanthenol	N/A
7154	HCV	vinburnine	0.00503177	0.306938	1.36e-05		vinburnine	N/A
1237	HCV	fluphenazine	0.00522888	0.318961	1e-05		fluphenazine	N/A
2698	HCV	fulvestrant	0.0052686	0.321385	1e-08		fulvestrant	N/A
2498	HCV	vancomycin	0.00561081	0.34226	2.6e-06		vancomycin	N/A
3747	HCV	flunisolide	0.00592856	0.361642	9.2e-06		flunisolide	N/A
2094	HCV	levamisole	0.00626016	0.38187	1.66e-05		levamisole	N/A
2043	HCV	paclitaxel	0.00656034	0.400181	4.6e-06		paclitaxel	N/A
407	HCV	sodium_phenylbutyrate	0.00660136	0.402683	0.001		sodium_phenylbutyrate	N/A
370	HCV	troglitazone	0.00714645	0.435933	1e-05		troglitazone	N/A
3928	HCV	famprofazone	0.00736006	0.448964	1.06e-05		famprofazone	N/A
5908	HCV	trichostatin_A	0.00779498	0.475494	1e-06		trichostatin_A	N/A
2786	HCV	corynanthine	0.00928059	0.556835	1.02e-05		corynanthine	N/A
2432	HCV	neostigmine_bromide	0.00959497	0.585293	1.32e-05		neostigmine_bromide	N/A
425	HCV	staurosporine	0.00978724	0.597022	1e-08		staurosporine	N/A
4822	HCV	seneciphylline	0.00978761	0.597044	1.2e-05		seneciphylline	N/A
6475	HCV	prazosin	0.00984958	0.600825	9.6e-06		prazosin	N/A
1872	HCV	adiphenine	0.010086	0.615244	1.14e-05		adiphenine	N/A
7332	HCV	sitosterol	0.0101409	0.618596	9.6e-06		sitosterol	N/A
2451	HCV	metixene	0.0102107	0.622856	1.16e-05		metixene	N/A
3047	HCV	nizatidine	0.0103335	0.630341	1.2e-05		nizatidine	N/A
5701	HCV	domperidone	0.0105837	0.645604	7.4e-06		domperidone	N/A
3784	HCV	vincamine	0.010611	0.64727	1.12e-05		vincamine	N/A
3769	HCV	sulfachlorpyridazine	0.0112137	0.684037	1.4e-05		sulfachlorpyridazine	N/A
2275	HCV	nimesulide	0.0114047	0.695684	1.3e-05		nimesulide	N/A
4071	HCV	co-dergocrine_mesilate	0.0117571	0.717182	6.4e-06		co-dergocrine_mesilate	N/A
1957	HCV	methotrexate	0.0118788	0.724604	8.8e-06		methotrexate	N/A
7487	HCV	semustine	0.0124862	0.761656	0.0001		semustine	N/A
4578	HCV	apigenin	0.0125237	0.751422	1.48e-05		apigenin	N/A
6958	HCV	sirolimus	0.0128208	0.769246	1e-07		sirolimus	N/A
4319	HCV	spiramycin	0.0130433	0.795643	4.8e-06		spiramycin	N/A
4695	HCV	clemizole	0.0130433	0.795643	1.1e-05		clemizole	7.15	Sci. Transl. Med. 7, 282ra49 (2015)
1394	HCV	acenocoumarol	0.0135858	0.815145	1.14e-05		acenocoumarol	N/A
2446	HCV	dinoprost	0.013868	0.845948	8.4e-06		dinoprost	N/A
7238	HCV	leflunomide	0.013905	0.848204	1.48e-05		leflunomide	N/A
4206	HCV	pepstatin	0.0139595	0.83757	5.8e-06		pepstatin	N/A
6797	HCV	aconitine	0.0139814	0.852866	6.2e-06		aconitine	N/A
7262	HCV	alfadolone	0.0141427	0.862703	1.02e-05		alfadolone	N/A
2067	HCV	ursolic_acid	0.0141427	0.84856	8.8e-06		ursolic_acid	N/A
6056	HCV	benzamil	0.0144815	0.868891	1.12e-05		benzamil	N/A
5476	HCV	torasemide	0.0144815	0.883373	1.14e-05		torasemide	N/A
6614	HCV	apramycin	0.0144815	0.883373	7.4e-06		apramycin	N/A
2303	HCV	nitrofurantoin	0.0147009	0.882057	1.68e-05		nitrofurantoin	N/A
6731	HCV	rolitetracycline	0.0147009	0.896758	7.6e-06		rolitetracycline	N/A
2704	HCV	haloperidol	0.0154782	0.94417	1e-05		haloperidol	N/A
4657	HCV	amiodarone	0.0154782	0.94417	5.8e-06		amiodarone	N/A
6907	HCV	PF-00562151-00	0.0161612	0.985835	1e-05		PF-00562151-00	N/A
5535	HCV	aztreonam	0.0162278	0.989895	9.2e-06		aztreonam	N/A
5465	HCV	pivampicillin	0.0162278	0.989895	8.6e-06		pivampicillin	N/A
2719	HCV	pipenzolate_bromide	0.0165769	1	9.2e-06		pipenzolate_bromide	N/A
4995	HCV	ketanserin	0.0168321	1	7e-06		ketanserin	N/A
5079	HCV	mafenide	0.0170813	1	1.8e-05		mafenide	N/A
463	HCV	rofecoxib	0.0171802	1	1e-05		rofecoxib	N/A
2569	HCV	guaifenesin	0.0177666	1	2.02e-05		guaifenesin	N/A
5084	HCV	resveratrol	0.0182594	1	1.76e-05		resveratrol	N/A
1929	HCV	cotinine	0.0182631	1	2.26e-05		cotinine	N/A
5695	HCV	eticlopride	0.0186258	1	1.06e-05		eticlopride	N/A
6948	HCV	15-delta_prostaglandin_J2	0.01881	1	1e-05		15-delta_prostaglandin_J2	N/A
4250	HCV	Prestwick-967	0.0191909	1	2.58e-05		Prestwick-967	N/A
3343	HCV	suprofen	0.0193343	1	1.54e-05		suprofen	N/A
3468	HCV	azlocillin	0.0194693	1	8.2e-06		azlocillin	N/A
1003	HCV	nordihydroguaiaretic_acid	0.0194693	1	1e-06		nordihydroguaiaretic_acid	N/A
3545	HCV	cyproterone	0.0198531	1	9.6e-06		cyproterone	N/A
2643	HCV	flupentixol	0.0202139	1	7.8e-06		flupentixol	N/A
3801	HCV	orphenadrine	0.0205377	1	1.3e-05		orphenadrine	10.5	Sci. Transl. Med. 7, 282ra49 (2015)
6903	HCV	AH-23848	0.0210223	1	1e-06		AH-23848	N/A
4567	HCV	cefixime	0.0211977	1	8.8e-06		cefixime	N/A
4545	HCV	ethotoin	0.0212191	1	1.96e-05		ethotoin	N/A
6693	HCV	desipramine	0.0212325	1	1.32e-05		desipramine	N/A
4434	HCV	alpha-estradiol	0.0216204	1	1e-08		alpha-estradiol	N/A
5683	HCV	N-acetyl-L-leucine	0.0222842	1	2.3e-05		N-acetyl-L-leucine	N/A
5824	HCV	meropenem	0.0226846	1	1.04e-05		meropenem	N/A
4980	HCV	Prestwick-857	0.0229672	1	1.22e-05		Prestwick-857	N/A
6033	HCV	Prestwick-664	0.0234208	1	8.4e-06		Prestwick-664	N/A
2726	HCV	bergenin	0.0234208	1	1.16e-05		bergenin	N/A
2149	HCV	harmaline	0.0236227	1	1.4e-05		harmaline	N/A
1544	HCV	guanabenz	0.0240102	1	1.38e-05		guanabenz	N/A
2939	HCV	benzathine_benzylpenicillin	0.0240102	1	4.2e-06		benzathine_benzylpenicillin	N/A
1949	HCV	loperamide	0.0241322	1	7.8e-06		loperamide	N/A
7141	HCV	alprenolol	0.0241322	1	1.4e-05		alprenolol	N/A
3757	HCV	fluocinonide	0.0251141	1	8e-06		fluocinonide	N/A
7496	HCV	suramin_sodium	0.0252633	1	1e-05		suramin_sodium	N/A
4272	HCV	flumetasone	0.025497	1	9.8e-06		flumetasone	N/A
4380	HCV	CP-690334-01	0.0257387	1	1e-05		CP-690334-01	N/A
2975	HCV	bethanechol	0.0260543	1	2.04e-05		bethanechol	N/A
7368	HCV	metaraminol	0.0261984	1	8.6e-06		metaraminol	N/A
1778	HCV	berberine	0.0261984	1	1.08e-05		berberine	N/A
5644	HCV	biperiden	0.02663	1	1.14e-05		biperiden	N/A
5491	HCV	pizotifen	0.0267002	1	9.4e-06		pizotifen	N/A
5773	HCV	methacholine_chloride	0.0267505	1	2.04e-05		methacholine_chloride	N/A
5262	HCV	azathioprine	0.027004	1	1.44e-05		azathioprine	N/A
4121	HCV	ginkgolide_A	0.0271403	1	9.8e-06		ginkgolide_A	N/A
5486	HCV	tridihexethyl	0.0273248	1	1.14e-05		tridihexethyl	N/A
283	HCV	quercetin	0.0274577	1	1e-06		quercetin	N/A
2059	HCV	gallamine_triethiodide	0.0275186	1	4.4e-06		gallamine_triethiodide	N/A
7325	HCV	cyclopenthiazide	0.0275186	1	1.06e-05		cyclopenthiazide	N/A
7379	HCV	halcinonide	0.0276363	1	8.8e-06		halcinonide	N/A
4584	HCV	harman	0.0276363	1	1.82e-05		harman	N/A
2877	HCV	Prestwick-559	0.0278387	1	8.2e-06		Prestwick-559	N/A
5606	HCV	naloxone	0.028204	1	1.1e-05		naloxone	N/A
3039	HCV	equilin	0.028285	1	1.5e-05		equilin	N/A
2801	HCV	emetine	0.0283014	1	7.2e-06		emetine	N/A
2503	HCV	suxibuzone	0.0289958	1	9.2e-06		suxibuzone	N/A
5849	HCV	glibenclamide	0.029664	1	8e-06		glibenclamide	N/A
7389	HCV	0173570-0000	0.0301177	1	1e-05		0173570-0000	N/A
6642	HCV	doxazosin	0.0311466	1	7.4e-06		doxazosin	N/A
2340	HCV	ofloxacin	0.0330759	1	1.1e-05		ofloxacin	N/A
2399	HCV	niflumic_acid	0.03329	1	1.42e-05		niflumic_acid	N/A
6659	HCV	clorgiline	0.0337721	1	1.3e-05		clorgiline	N/A
2728	HCV	butacaine	0.033808	1	1.3e-05		butacaine	N/A
5433	HCV	proxymetacaine	0.0338205	1	1.2e-05		proxymetacaine	N/A
7004	HCV	asiaticoside	0.0338205	1	4.2e-06		asiaticoside	N/A
1491	HCV	amylocaine	0.0340111	1	1.48e-05		amylocaine	N/A
2186	HCV	Prestwick-665	0.0348116	1	1.16e-05		Prestwick-665	N/A
5395	HCV	aminophylline	0.0350037	1	9.6e-06		aminophylline	N/A
5994	HCV	lymecycline	0.0350037	1	6.6e-06		lymecycline	N/A
5467	HCV	etofylline	0.0350037	1	1.78e-05		etofylline	N/A
313	HCV	NU-1025	0.0350049	1	0.0001		NU-1025	N/A
4204	HCV	epitiostanol	0.036148	1	1.3e-05		epitiostanol	N/A
3048	HCV	propofol	0.036183	1	2.24e-05		propofol	N/A
2653	HCV	estradiol	0.0362655	1	1.46e-05		estradiol	N/A
5688	HCV	altretamine	0.0367376	1	1.9e-05		altretamine	N/A
309	HCV	exisulind	0.0368962	1	5e-05		exisulind	N/A
2397	HCV	enalapril	0.0368962	1	8.2e-06		enalapril	N/A
2541	HCV	propidium_iodide	0.0370476	1	6e-06		propidium_iodide	N/A
3992	HCV	phenacetin	0.0371238	1	2.24e-05		phenacetin	N/A
6044	HCV	acacetin	0.0371238	1	1.4e-05		acacetin	N/A
1333	HCV	mebhydrolin	0.0374899	1	4.8e-06		mebhydrolin	N/A
6639	HCV	lasalocid	0.0380574	1	6.6e-06		lasalocid	N/A
6677	HCV	ciclopirox	0.0395412	1	1.5e-05		ciclopirox	N/A
1856	HCV	nifedipine	0.0397241	1	1.16e-05		nifedipine	N/A
464	HCV	pirinixic_acid	0.0397298	1	0.0001		pirinixic_acid	N/A
2532	HCV	alclometasone	0.0404096	1	7.6e-06		alclometasone	N/A
2764	HCV	calycanthine	0.0407583	1	1.16e-05		calycanthine	N/A
4194	HCV	pyrimethamine	0.0410001	1	1.6e-05		pyrimethamine	N/A
204	HCV	sulfasalazine	0.0422599	1	0.0001		sulfasalazine	N/A
2812	HCV	hydroxyachillin	0.042686	1	1.42e-05		hydroxyachillin	N/A
3142	HCV	ribavirin	0.0427104	1	1.64e-05		ribavirin	N/A
5682	HCV	niridazole	0.0427945	1	1.86e-05		niridazole	N/A
3902	HCV	withaferin_A	0.0434202	1	1e-06		withaferin_A	N/A
6068	HCV	estropipate	0.044294	1	9.2e-06		estropipate	N/A
6729	HCV	erythromycin	0.0444022	1	5.4e-06		erythromycin	N/A
7498	HCV	irinotecan	0.0444082	1	0.0001		irinotecan	N/A
5942	HCV	LY-294002	0.044687	1	1e-05		LY-294002	N/A
2901	HCV	metacycline	0.0447503	1	8.4e-06		metacycline	N/A
2828	HCV	omeprazole	0.0447503	1	1.16e-05		omeprazole	N/A
3290	HCV	cephaeline	0.0450883	1	6e-06		cephaeline	N/A
4260	HCV	picrotoxinin	0.0450969	1	1.36e-05		picrotoxinin	N/A
5442	HCV	trifluoperazine	0.0451015	1	8.4e-06		trifluoperazine	N/A
5774	HCV	Prestwick-1085	0.0453561	1	1.46e-05		Prestwick-1085	N/A
5294	HCV	felodipine	0.046206	1	1.04e-05		felodipine	N/A
2254	HCV	etodolac	0.046206	1	1.4e-05		etodolac	N/A
1508	HCV	glipizide	0.0462766	1	9e-06		glipizide	N/A
3790	HCV	nialamide	0.0470401	1	1.34e-05		nialamide	N/A
7210	HCV	milrinone	0.0470401	1	1.9e-05		milrinone	N/A
6684	HCV	hydrocortisone	0.0471861	1	1.1e-05		hydrocortisone	N/A
4168	HCV	sanguinarine	0.0476463	1	1.2e-05		sanguinarine	N/A
4133	HCV	trihexyphenidyl	0.0477166	1	1.18e-05		trihexyphenidyl	N/A
4668	HCV	bephenium_hydroxynaphthoate	0.0477166	1	9e-06		bephenium_hydroxynaphthoate	N/A
4379	HCV	CP-320650-01	0.0477166	1	1e-05		CP-320650-01	N/A
5388	HCV	butoconazole	0.0477166	1	8.4e-06		butoconazole	N/A
6669	HCV	benzbromarone	0.0477166	1	9.4e-06		benzbromarone	N/A
1684	HCV	homatropine	0.0486231	1	1.12e-05		homatropine	N/A
2326	HCV	ethisterone	0.0486701	1	1.28e-05		ethisterone	N/A
6723	HCV	primidone	0.048956	1	1.84e-05		primidone	N/A
6655	HCV	edrophonium_chloride	0.0491921	1	1.98e-05		edrophonium_chloride	N/A
2473	HCV	pentamidine	0.0492546	1	6.8e-06		pentamidine	N/A
5694	HCV	terguride	0.0496573	1	8.8e-06		terguride	N/A
627	HCV	monastrol	0.0498485	1	0.0001		monastrol	N/A
1532	HCV	diltiazem	0.0498485	1	8.8e-06		diltiazem	N/A

## Sheet: experimetanl data fro anti-HCV
Drug_name	EC50 (uM)	Reference
Dexchlorpheniramine	16.8	Sci. Transl. Med. 7, 282ra49 (2015)
Dexbrompheniramine	21.1	Sci. Transl. Med. 7, 282ra49 (2015)
Iproheptine	>100	Sci. Transl. Med. 7, 282ra49 (2015)
Clemizole	7.15	Sci. Transl. Med. 7, 282ra49 (2015)
Mizolastine	0.2	Sci. Transl. Med. 7, 282ra49 (2015)
Chlorcyclizine	0.2	Sci. Transl. Med. 7, 282ra49 (2015)
Hydroxyzine	0.38	Sci. Transl. Med. 7, 282ra49 (2015)
Homochlorcyclizine	0.47	Sci. Transl. Med. 7, 282ra49 (2015)
Cetirizine_amide	0.67	Sci. Transl. Med. 7, 282ra49 (2015)
Cyclizine	2.01	Sci. Transl. Med. 7, 282ra49 (2015)
Cinnarizine	5.06	Sci. Transl. Med. 7, 282ra49 (2015)
Cetirizine	>100	Sci. Transl. Med. 7, 282ra49 (2015)
Cyproheptadine	0.94	Sci. Transl. Med. 7, 282ra49 (2015)
Desloratadine	11.8	Sci. Transl. Med. 7, 282ra49 (2015)
Epinastine	11.8	Sci. Transl. Med. 7, 282ra49 (2015)
Ketotifen	14.9	Sci. Transl. Med. 7, 282ra49 (2015)
Loratadine	23.7	Sci. Transl. Med. 7, 282ra49 (2015)
Azatadine	>100	Sci. Transl. Med. 7, 282ra49 (2015)
Olopatadine	>100	Sci. Transl. Med. 7, 282ra49 (2015)
Antazoline	10.5	Sci. Transl. Med. 7, 282ra49 (2015)
Diphenhydramine	3.35	Sci. Transl. Med. 7, 282ra49 (2015)
Orphenadrine	10.5	Sci. Transl. Med. 7, 282ra49 (2015)
Carbinoxamine	18.8	Sci. Transl. Med. 7, 282ra49 (2015)
Doxylamine	>100	Sci. Transl. Med. 7, 282ra49 (2015)
Alverine	10	Sci. Transl. Med. 7, 282ra49 (2015)
Dimethindene	11.8	Sci. Transl. Med. 7, 282ra49 (2015)
Clemastine	23.7	Sci. Transl. Med. 7, 282ra49 (2015)
Azelastine	23.7	Sci. Transl. Med. 7, 282ra49 (2015)
Cyromazine	>100	Sci. Transl. Med. 7, 282ra49 (2015)
Amlexanox	>100	Sci. Transl. Med. 7, 282ra49 (2015)
Bromisovalum	>100	Sci. Transl. Med. 7, 282ra49 (2015)
Thonylamine	>100	Sci. Transl. Med. 7, 282ra49 (2015)
Nedocromil	>100	Sci. Transl. Med. 7, 282ra49 (2015)
Nedocromil	>100	Sci. Transl. Med. 7, 282ra49 (2015)
Meclozine	6.37	Sci. Transl. Med. 7, 282ra49 (2015)
Adanton	8.41	Sci. Transl. Med. 7, 282ra49 (2015)
Trimeprazine	9	Sci. Transl. Med. 7, 282ra49 (2015)
Mequitazine	13.3	Sci. Transl. Med. 7, 282ra49 (2015)
Etymemazine	23.7	Sci. Transl. Med. 7, 282ra49 (2015)
Levomequitazine	>100	Sci. Transl. Med. 7, 282ra49 (2015)
Chlorpromazine	>100	Sci. Transl. Med. 7, 282ra49 (2015)
Promethazine	>100	Sci. Transl. Med. 7, 282ra49 (2015)
Oxomemazine	>100	Sci. Transl. Med. 7, 282ra49 (2015)
Monatepil	9.44	Sci. Transl. Med. 7, 282ra49 (2015)
Chlobenztropine	0.84	Sci. Transl. Med. 7, 282ra49 (2015)
Terfenadine	1.68	Sci. Transl. Med. 7, 282ra49 (2015)
Astemizole	2.66	Sci. Transl. Med. 7, 282ra49 (2015)
Ebastine	2.99	Sci. Transl. Med. 7, 282ra49 (2015)
Diphenylpyraline	4.02	Sci. Transl. Med. 7, 282ra49 (2015)
Thenalidine	10.5	Sci. Transl. Med. 7, 282ra49 (2015)
Diphenidol	14.9	Sci. Transl. Med. 7, 282ra49 (2015)
Fexofenadine	>100	Sci. Transl. Med. 7, 282ra49 (2015)
Phenylpropanalamine	0.47	Sci. Transl. Med. 7, 282ra49 (2015)
Chloropyramine	5.06	Sci. Transl. Med. 7, 282ra49 (2015)
Methapyrilene	13.3	Sci. Transl. Med. 7, 282ra49 (2015)
Triprolidine	>100	Sci. Transl. Med. 7, 282ra49 (2015)
Pheniramine	>100	Sci. Transl. Med. 7, 282ra49 (2015)
Acrivastine	>100	Sci. Transl. Med. 7, 282ra49 (2015)
Mepyramine	>100	Sci. Transl. Med. 7, 282ra49 (2015)
Quifenadine	16.709	Sci. Transl. Med. 7, 282ra49 (2015)
Tazanolast	>100	Sci. Transl. Med. 7, 282ra49 (2015)
Pemirolast	>100	Sci. Transl. Med. 7, 282ra49 (2015)
Histamine	NA	Sci. Transl. Med. 7, 282ra49 (2015)
